# Supplementary material for: Iron-catalyzed cross-aldol reactions of ortho-diketones and methyl ketones
Source: Royal Society of Chemistry journal article supplement (doi:10.1039/b903515j), 2009-01-01

# Supporting Materials

## Iron-catalyzed cross-aldol reactions of ortho-diketones and methyl ketones

Haijun Li,<sup>a</sup> Wenjuan Li<sup>a</sup> and Zhiping Li<sup>\*a,b</sup>

<sup>a</sup> Department of Chemistry, Renmin University of China, Beijing 100872, China.

<sup>b</sup> State Key Laboratory of Fine Chemicals, Dalian University of Technology, Dalian 116012, China

Email: [zhipingli@ruc.edu.cn](mailto:zhipingli@ruc.edu.cn)

### Contents

|                                                                                        |    |
|----------------------------------------------------------------------------------------|----|
| 1) Experimental details and characterization data for all compounds.....               | 2  |
| 2) X-ray crystallography data for <b>4b</b> .....                                      | 10 |
| 3) Copies of <sup>1</sup> H NMR and <sup>13</sup> C NMR spectra for all compounds..... | 17 |
| 4) Standard isotopic distribution for compounds containing chlorine and bromine.....   | 56 |
| 5) Copies of the representative mass spectra.....                                      | 56 |

## 1) Experimental details and characterization data for all compounds

**General information:**  $^1\text{H}$  NMR spectra were recorded on AVANCE 400 MHz, JEOL 400 MHz and JEOL 600 MHz spectrometers and the chemical shifts were reported in parts per million ( $\delta$ ) relative to internal standard TMS (0 ppm) for  $\text{CDCl}_3$ . The peak patterns are indicated as follows: s, singlet; d, doublet; bs, broad singlet; dd, doublet of doublet; t, triplet; m, multiplet; q, quartet. The coupling constants,  $J$ , are reported in Hertz (Hz).  $^{13}\text{C}$  NMR spectra were obtained on AVANCE 100.6 MHz, JEOL 99.5 and JEOL 150.9 MHz and referenced to the internal solvent signals (central peak is 77.0 ppm in  $\text{CDCl}_3$ ). Mass spectra were determined with AEI-MS 50 for EI-MS; APEX II (Bruker Inc.) for HR-MS and ESI-MS. IR spectra were recorded by a Nicolet 5MX-S infrared spectrometer. Flash column chromatography was performed over silica gel 200-300. X-ray data collections were performed at 20 °C on a Rigaku RAXIS RAPID IP diffractometer, using graphite-monochromated Mo  $K\alpha$  radiation ( $\lambda = 0.71073 \text{ \AA}$ ). The determination of crystal class and unit cell parameters was carried out by the Rapid-AUTO (Rigaku 2000) program package. The raw frame data were processed using Crystal Structure (Rigaku/MS 2000) to yield the reflection data file. The structure was solved by use of SHELXTL program. Refinement was performed on  $F^2$  anisotropically for all the non-hydrogen atoms by the full-matrix least-squares method. (G. M. Sheldrick, *SHELXTL 5.10 for Windows NT: Structure Determination Software Programs*; Bruker Analytical X-ray Systems, Inc.: Madison, WI, 1997.) All reagents were weighed and handled in air at room temperature. Unless otherwise noted, all reactions were performed under a nitrogen atmosphere. All chemicals were purchased from Alfa, Acros, Aldrich, TCI, and Strem and used without further purification.

**General procedure for products 3:** To a 2.0 mL solution of **1** (0.5 mmol) in petroleum ether (PE) under  $\text{N}_2$  at room temperature was added **2** (0.75 mmol, 1.5 eq). The resulting mixture was stirred for 24h at room temperature. The resulting reaction solution was mixed with few silica gel and evaporated in vacuo. The residue was purified by flash column chromatography using silica gel (ethyl acetate : PE = 1 : 5) to afford the desired products.

**General procedure for products 4:** An oven-dried Schlenk tube was charged with **3** (0.2 mmol) under  $\text{N}_2$  at room temperature. The Schlenk tube was put into a pre-heated oil

bath at 130 °C for 40 minutes. The reaction mixture was quenched with saturated NaHCO<sub>3</sub> and washed with 10 mL ether. The resulting aqua phase was acidified by 2 mL 3N HCl and extracted with 15 mL ether. The extract was washed with water and dried over Na<sub>2</sub>SO<sub>4</sub>. The solvent was evaporated in vacuo to afford the desired products.

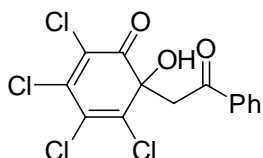

**2,3,4,5-Tetrachloro-6-hydroxy-6-(2-oxo-2-phenylethyl)cyclohexa-2,4-dienone (3a).**

Isolated by flash column chromatography (ethyl acetate/petroleum ether = 1:5, R<sub>f</sub> = 0.4). <sup>1</sup>H NMR (ppm) δ 7.86(dd, *J* = 8.4, 1.2Hz, 2H), 7.62-7.59(m, 1H), 7.48-7.45(m, 2H), 4.17(d, *J* = 16.8Hz, 1H), 3.96(d, *J* = 16.8Hz, 1H), 3.60(bs, 1H); <sup>13</sup>C NMR (ppm) δ 196.1, 189.6, 145.2, 138.3, 135.0, 134.3, 129.8, 128.9, 128.3, 127.6, 76.3, 51.3; MS(EI) *m/z*(%): 366(M<sup>+</sup>), 330, 293, 248, 219, 147, 120, 105(100), 91, 77, 51, 36; HRMS(ESI) calcd for C<sub>14</sub>H<sub>8</sub>Cl<sub>4</sub>O<sub>3</sub>(M<sup>+</sup>+Na): 386.9120; found: 386.9128.

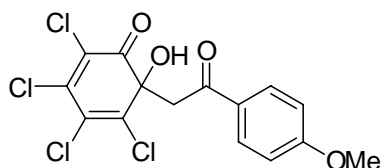

**2,3,4,5-Tetrachloro-6-hydroxy-6-(2-(4-methoxyphenyl)-2-oxoethyl)cyclohexa-2,4-**

**dienone (3b).** Isolated by flash column chromatography (ethyl acetate/petroleum ether = 1:5, R<sub>f</sub> = 0.3). <sup>1</sup>H NMR (ppm) δ 7.79(d, *J* = 8.8Hz, 2H), 6.87(d, *J* = 8.8Hz, 2H), 4.06(d, *J* = 16.8Hz, 1H), 3.85(d, *J* = 16.8Hz, 1H), 3.82(s, 3H), 3.59(bs, 1H); <sup>13</sup>C NMR (ppm) δ 194.4, 189.6, 164.4, 144.9, 138.5, 130.7, 129.8, 128.2, 127.4, 114.0, 76.5, 55.6, 51.0; MS(EI) *m/z*(%): 396(M<sup>+</sup>), 256, 248, 223, 177, 169, 149, 135(100), 113, 107, 85, 71, 57, 43, 30; HRMS(ESI) calcd for C<sub>15</sub>H<sub>10</sub>Cl<sub>4</sub>O<sub>4</sub> (M<sup>+</sup>+Na): 416.9225; found: 416.9229.

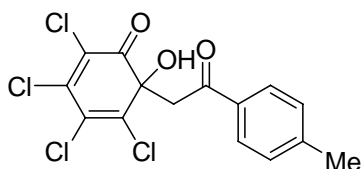

**2,3,4,5-Tetrachloro-6-hydroxy-6-(2-oxo-2-p-tolylethyl)cyclohexa-2,4-dienone (3c).**

Isolated by flash column chromatography (ethyl acetate/petroleum ether = 1:5, R<sub>f</sub> = 0.4). <sup>1</sup>H NMR (ppm) δ 7.78(d, *J* = 8.0Hz, 2H), 7.26(d, *J* = 8.0Hz, 2H), 4.32(bs, 1H), 4.18(d, *J*

= 17.2Hz, 1H), 3.98(d,  $J$  = 17.2Hz, 1H), 2.41(s, 3H);  $^{13}\text{C}$  NMR (ppm)  $\delta$  195.9, 189.5, 145.3, 144.8, 138.7, 132.6, 129.7, 129.5, 128.4, 127.2, 76.2, 51.1, 21.7; MS(EI)  $m/z$ (%): 380( $\text{M}^+$ ), 342, 329, 327, 299, 281, 248, 222, 185, 183, 161, 149, 134, 119(100), 105, 91, 73, 65, 55, 40; HRMS(ESI) calcd for  $\text{C}_{15}\text{H}_{10}\text{Cl}_4\text{O}_3$  ( $\text{M}^+\text{+Na}$ ): 400.9276; found: 402.9257.

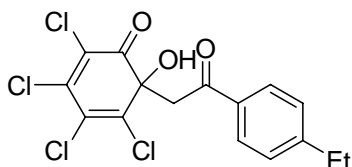

**2,3,4,5-Tetrachloro-6-(2-(4-ethylphenyl)-2-oxoethyl)-6-hydroxycyclohexa-2,4-**

**dienone (3d).** Isolated by flash column chromatography (ethyl acetate/petroleum ether = 1:5,  $R_f$  = 0.4).  $^1\text{H}$  NMR (ppm)  $\delta$  7.79(d,  $J$  = 8.4Hz, 2H), 7.28(d,  $J$  = 8.4Hz, 2H), 4.15(d,  $J$  = 17.4Hz, 1H), 3.94(d,  $J$  = 17.4Hz, 1H), 3.71(bs, 1H), 2.70(q,  $J$  = 7.8Hz, 2H), 1.24(t,  $J$  = 7.8Hz, 3H);  $^{13}\text{C}$  NMR (ppm)  $\delta$  195.7, 189.6, 151.5, 145.0, 138.4, 132.7, 129.7, 128.5, 128.3, 127.5, 76.3, 51.2, 29.0, 15.0; MS(EI)  $m/z$ (%): 394( $\text{M}^+$ ), 358, 327, 299, 248, 224, 222, 175, 148, 133(100), 119, 105, 91, 77, 51, 37; HRMS(ESI) calcd for  $\text{C}_{16}\text{H}_{12}\text{Cl}_4\text{O}_3$  ( $\text{M}^+\text{+Na}$ ): 414.9433; found: 416.9406.

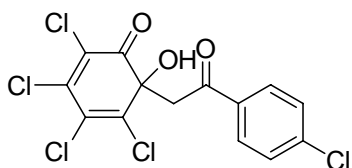

**2,3,4,5-Tetrachloro-6-(2-(4-chlorophenyl)-2-oxoethyl)-6-hydroxycyclohexa-2,4-**

**dienone (3e).** Isolated by flash column chromatography (ethyl acetate/petroleum ether = 1:5,  $R_f$  = 0.4).  $^1\text{H}$  NMR (ppm)  $\delta$  7.76(d,  $J$  = 8.8Hz, 2H), 7.39(d,  $J$  = 8.8Hz, 2H), 4.07(d,  $J$  = 17.2Hz, 1H), 3.88(d,  $J$  = 17.2Hz, 1H), 3.68(bs, 1H);  $^{13}\text{C}$  NMR (ppm)  $\delta$  195.0, 189.4, 145.1, 140.9, 138.3, 133.3, 129.7, 129.2, 127.5, 76.2, 51.1; MS(EI)  $m/z$ (%): 400( $\text{M}^+$ ), 384, 248, 212, 181, 154, 139(100), 113, 111, 87, 75, 50, 37; HRMS(ESI) calcd for  $\text{C}_{14}\text{H}_7\text{Cl}_5\text{O}_3$  ( $\text{M}^+\text{+Na}$ ): 420.8730; found: 420.8726.

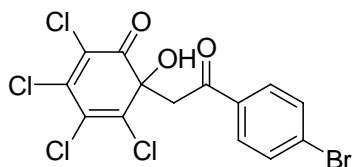

**6-(2-(4-Bromophenyl)-2-oxoethyl)-2,3,4,5-tetrachloro-6-hydroxycyclohexa-2,4-**

**dienone (3f).** Isolated by flash column chromatography (ethyl acetate/petroleum ether =

1:5,  $R_f = 0.3$ ).  $^1\text{H}$  NMR (ppm)  $\delta$  7.73(d,  $J = 8.8\text{Hz}$ , 2H), 7.62(d,  $J = 8.8\text{Hz}$ , 2H), 4.10(d,  $J = 16.8\text{Hz}$ , 1H), 3.91(d,  $J = 16.8\text{Hz}$ , 1H), 3.50(bs, 1H);  $^{13}\text{C}$  NMR (ppm)  $\delta$  195.1, 189.5, 145.2, 138.0, 133.7, 132.2, 129.8, 129.7, 129.6, 127.7, 76.2, 51.1; MS(EI)  $m/z(\%)$ : 442( $\text{M}^+$ ), 410, 408, 380, 373, 345, 327, 303, 299, 250, 248, 222, 198, 185(100), 169, 155, 131, 119, 104, 76, 63, 50; HRMS(ESI) calcd for  $\text{C}_{14}\text{H}_7\text{BrCl}_4\text{O}_3$  ( $\text{M}^+ + \text{Na}$ ): 464.8225; found: 464.8236.

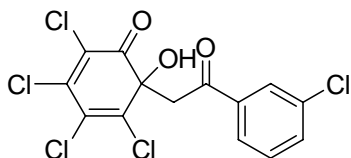

**2,3,4,5-Tetrachloro-6-(2-(3-chlorophenyl)-2-oxoethyl)-6-hydroxycyclohexa-2,4-**

**dienone(3g).** Isolated by flash column chromatography (ethyl acetate/petroleum ether = 1:5,  $R_f = 0.3$ ).  $^1\text{H}$  NMR (ppm)  $\delta$  7.79(s, 1H), 7.70(d,  $J = 7.6\text{Hz}$ , 1H), 7.51(d,  $J = 7.6\text{Hz}$ , 1H), 7.36(t,  $J = 7.6\text{Hz}$ , 1H), 4.08(d,  $J = 17.2\text{Hz}$ , 1H), 3.92(d,  $J = 17.2\text{Hz}$ , 1H);  $^{13}\text{C}$  NMR (ppm)  $\delta$  195.0, 189.4, 145.2, 138.2, 136.4, 135.2, 134.1, 130.2, 129.7, 128.3, 127.6, 126.4, 76.1, 51.1; MS(EI)  $m/z(\%)$ : 400( $\text{M}^+$ ), 384, 250, 248, 223, 181, 154, 139(100), 125, 111, 97, 79, 75, 52; HRMS(ESI) calcd for  $\text{C}_{14}\text{H}_7\text{Cl}_5\text{O}_3$  ( $\text{M}^+ + \text{Na}$ ): 420.8730; found: 420.8732.

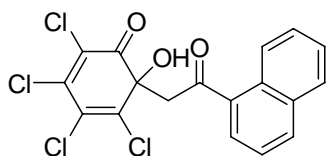

**2,3,4,5-Tetrachloro-6-hydroxy-6-(2-(naphthalen-1-yl)-2-oxoethyl)cyclohexa-2,4-**

**dienone (3h).** Isolated by flash column chromatography (ethyl acetate/petroleum ether = 1:5,  $R_f = 0.3$ ).  $^1\text{H}$  NMR (ppm)  $\delta$  8.49(d,  $J = 8.0\text{Hz}$ , 1H), 7.95(d,  $J = 8.0\text{Hz}$ , 1H), 7.88(d,  $J = 7.2\text{Hz}$ , 1H), 7.79(d,  $J = 8.0\text{Hz}$ , 1H), 7.54-7.40(m, 3H), 4.18(d,  $J = 17.2\text{Hz}$ , 1H), 4.09(d,  $J = 17.2\text{Hz}$ , 1H);  $^{13}\text{C}$  NMR (ppm)  $\delta$  199.5, 189.6, 145.0, 138.6, 134.3, 133.8, 132.6, 129.8, 129.7, 129.4, 128.6, 128.4, 127.4, 126.7, 125.4, 124.2, 77.2, 53.9; MS(EI)  $m/z(\%)$ : 416( $\text{M}^+$ ), 380, 377, 351, 349, 315, 250, 248, 223, 212, 195, 182, 170, 155(100), 147, 127, 111, 101, 81, 77, 59; HRMS(ESI) calcd for  $\text{C}_{18}\text{H}_{10}\text{Cl}_4\text{O}_3$  ( $\text{M}^+ + \text{Na}$ ): 436.9276; found: 438.9244.

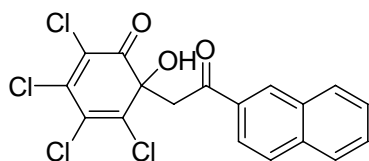

**2,3,4,5-Tetrachloro-6-hydroxy-6-(2-(naphthalen-2-yl)-2-oxoethyl)cyclohexa-2,4-dienone (3i).** Isolated by flash column chromatography (ethyl acetate/petroleum ether = 1:5,  $R_f$  = 0.3).  $^1\text{H}$  NMR (ppm)  $\delta$  8.43(s,1H), 7.96(d,  $J$  = 8.0Hz, 1H), 7.87(s,1H), 7.86(d,  $J$  = 8.0Hz, 2H), 7.64(t,  $J$  = 8.0Hz, 1H), 7.57(t,  $J$  = 8.0Hz, 1H), 4.35(d,  $J$  = 17.2Hz, 1H), 4.14(d,  $J$  = 17.2Hz, 1H), 3.68(bs,1H);  $^{13}\text{C}$  NMR (ppm)  $\delta$  196.1, 189.7, 145.1, 138.4, 135.9, 132.2, 132.1, 130.6, 129.8, 129.7, 129.1, 128.7, 127.8, 127.5, 127.1, 123.2, 76.3, 51.4; MS(EI)  $m/z$ (%): 416( $\text{M}^+$ ), 250, 248, 210, 197, 181, 165, 155, 149, 123(100), 111, 95, 87, 75, 57; HRMS(ESI) calcd for  $\text{C}_{18}\text{H}_{10}\text{Cl}_4\text{O}_3$  ( $\text{M}^+$ ): 414.9457; found: 416.9430.

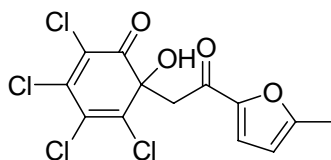

**2,3,4,5-Tetrachloro-6-hydroxy-6-(2-(5-methylfuran-2-yl)-2-oxoethyl)cyclohexa-2,4-dienone (3j).** Isolated by flash column chromatography (ethyl acetate/petroleum ether = 1:5,  $R_f$  = 0.4).  $^1\text{H}$  NMR (ppm)  $\delta$  7.11(d,  $J$  = 3.2Hz, 1H), 6.12(d,  $J$  = 3.2Hz, 1H), 4.35(bs, 1H), 3.83(d,  $J$  = 16.8Hz, 1H), 3.63(d,  $J$  = 16.8Hz, 1H), 2.32(s, 3H);  $^{13}\text{C}$  NMR (ppm)  $\delta$  189.6, 183.0, 159.4, 149.9, 144.8, 138.6, 129.7, 127.0, 121.3, 109.7, 76.6, 50.0, 14.0; MS(EI)  $m/z$ (%): 360, 337, 326, 309, 293, 284, 260, 248, 239, 214, 212, 197, 183, 169, 149, 141, 127, 109, 97, 71, 57(100), 43, 41, 27; HRMS(ESI) calcd for  $\text{C}_{13}\text{H}_8\text{Cl}_4\text{O}_4$  ( $\text{M}^+\text{+H}$ ): 368.9250; found: 370.3785.

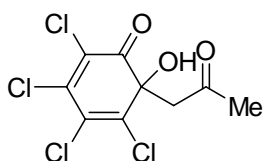

**2,3,4,5-Tetrachloro-6-hydroxy-6-(2-oxopropyl)cyclohexa-2,4-dienone (3k).**<sup>1</sup> Isolated by flash column chromatography (ethyl acetate/petroleum ether = 1:5,  $R_f$  = 0.3).  $^1\text{H}$  NMR (ppm)  $\delta$  3.79(bs,1H), 3.51(d,  $J$  = 17.4Hz, 1H), 3.44(d,  $J$  = 17.4Hz, 1H), 2.15(s, 3H);  $^{13}\text{C}$  NMR (ppm)  $\delta$  205.3, 189.6, 145.2, 138.1, 129.5, 127.4, 75.9, 54.8, 29.9; MS(EI)  $m/z$ (%):

304(M<sup>+</sup>), 143, 105, 85, 58, 43(100), 36; HRMS(ESI) calcd for C<sub>9</sub>H<sub>6</sub>Cl<sub>4</sub>O<sub>3</sub> (M<sup>+</sup>+H): 301.9071; found: 301.9031.

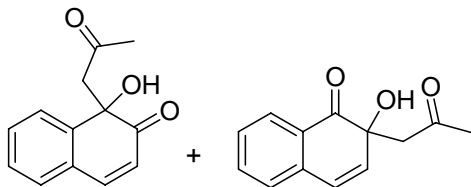

**1-Hydroxy-1-(2-oxopropyl)naphthalen-2(1H)-one and 2-hydroxy-2-(2-oxopropyl)naphthalene-1(2H)-one (3l+3l')**. A ratio of two isomers is 4:3. Isolated by flash column chromatography (ethyl acetate/petroleum ether = 1:2, R<sub>f</sub> = 0.5). **overlap:** <sup>1</sup>H NMR (ppm) δ 7.96(d, *J* = 7.6Hz, 1H), 7.65(d, *J* = 7.6Hz, 1H), 7.59(t, *J* = 7.6Hz, 1H), 7.45-7.28(m, 5H), 7.21(d, *J* = 7.6Hz, 1H), 6.55(d, *J* = 10.0Hz, 1H), 6.30(d, *J* = 10.0Hz, 1H), 6.23(d, *J* = 10.0Hz, 1H); **major isomer:** <sup>1</sup>H NMR (ppm) δ 4.31(s, 1H), 2.93(dd, *J* = 14.0Hz, 8.4 Hz, 2H), 2.10(s, 3H), **minor isomer:** <sup>1</sup>H NMR (ppm) δ 3.98(s, 1H), 2.87(dd, *J* = 15.2Hz, 6.4Hz, 2H), 2.18(s, 3H); <sup>13</sup>C NMR (ppm) δ 205.8, 205.5, 202.7, 201.2, 145.1, 142.5, 137.1, 135.0, 134.3, 130.3, 129.5, 128.7, 128.4, 128.3, 128.2, 127.5, 127.1, 126.0, 125.9, 122.8, 77.5, 74.7, 55.8, 52.6, 31.9, 31.7; MS(EI) *m/z*(%): 216(M<sup>+</sup>), 198, 188, 173, 160, 158, 145, 131(100), 117, 115, 102, 91, 85, 77, 63, 58, 51, 43, 27, 25; HRMS(ESI) calcd for C<sub>13</sub>H<sub>12</sub>O<sub>3</sub>(M<sup>+</sup>+Na): 239.0679; found: 239.0676.

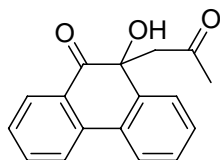

**10-Hydroxy-10-(2-oxo-propyl)-10H-phenanthren-9-one (3m).**<sup>2</sup> Isolated by flash column chromatography (ethyl acetate/hexane = 1:5, R<sub>f</sub> = 0.2). <sup>1</sup>H NMR (ppm) δ 7.91(d, *J* = 7.8Hz, 1H), 7.87(d, *J* = 7.8Hz, 1H), 7.79-7.78(m, 1H), 7.74-7.72(m, 1H), 7.66(t, *J* = 7.8Hz, 1H), 7.42-7.37(m, 3H), 4.51(bs, 1H), 2.97(d, *J* = 15.0Hz, 1H), 2.79(d, *J* = 15.0Hz, 1H), 2.06(s, 3H); <sup>13</sup>C NMR (ppm) δ 205.5, 202.2, 139.2, 136.6, 134.7, 129.2, 129.1, 128.8, 128.6, 128.5, 127.5, 125.8, 124.3, 123.0, 78.2, 55.4, 31.9.

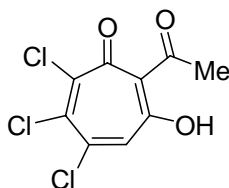

**(2Z,4E,6E)-7-Acetyl-2,3,4-trichloro-6-hydroxycyclohepta-2,4,6-trienone (4a).**<sup>1</sup> <sup>1</sup>H NMR (ppm)  $\delta$  7.03(s, 1H), 2.41(s, 3H); <sup>13</sup>C NMR (ppm)  $\delta$  204.6, 181.5, 171.3, 140.6, 140.5, 133.9, 128.2, 116.6, 28.7; MS(EI)  $m/z$ (%): 266(M<sup>+</sup>), 251, 238, 225, 223, 210, 196, 189, 171, 167, 159, 147, 133, 119, 107, 97, 87, 84, 69, 61, 43(100), 37, 27; HRMS(ESI) calcd for C<sub>9</sub>D<sub>6</sub>Cl<sub>4</sub>O<sub>3</sub> (M<sup>+</sup>): 266.9377; found: 266.9378.

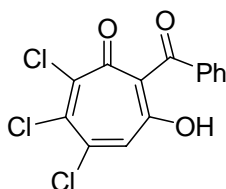

**(2Z,4E,6E)-7-Benzoyl-2,3,4-trichloro-6-hydroxycyclohepta-2,4,6-trienone (4b).** Crystals for X-ray analyses of **4b** were obtained on slow solvent evaporation of ether and petroleum ether. <sup>1</sup>H NMR (ppm)  $\delta$  7.56-7.53(m, 3H), 7.46-7.42(m, 2H), 7.22(s, 1H); <sup>13</sup>C NMR (ppm)  $\delta$  200.2, 181.4, 169.6, 141.2, 140.8, 136.5, 134.8, 132.8, 128.5, 128.3, 128.1, 115.3; MS(EI)  $m/z$ (%): 328(M<sup>+</sup>), 301, 299, 225, 223, 173, 119, 105, 97, 77(100), 63, 51, 40, 37; HRMS(ESI) calcd for C<sub>14</sub>H<sub>7</sub>Cl<sub>3</sub>O<sub>3</sub> (M<sup>+</sup>): 328.9534; found: 328.9542.

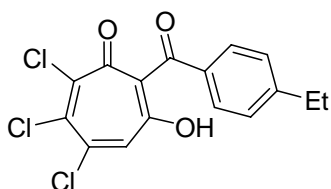

**(2Z,4E,6E)-2,3,4-Trichloro-7-(4-ethylbenzoyl)-6-hydroxycyclohepta-2,4,6-trienone (4c).** <sup>1</sup>H NMR (ppm)  $\delta$  7.48(dd,  $J$  = 8.4, 1.8Hz, 2H), 7.26-7.25(m, 2H), 7.21(s, 1H), 2.70(q,  $J$  = 7.8Hz, 2H), 1.26(t,  $J$  = 7.8Hz, 3H); <sup>13</sup>C NMR (ppm)  $\delta$  199.7, 181.6, 168.4, 150.0, 140.9, 140.7, 134.7, 133.8, 128.5, 128.4, 128.0, 115.2, 28.9, 14.9; MS(EI)  $m/z$ (%): 356(M<sup>+</sup>), 355, 329, 327, 299, 285, 265, 249, 236, 222, 207, 186, 173, 167, 149, 133(100), 119, 105, 91, 77, 63, 51, 37, 27; HRMS(ESI) calcd for C<sub>16</sub>H<sub>11</sub>Cl<sub>3</sub>O<sub>3</sub> (M<sup>+</sup>+H): 356.9847; found: 356.9843.



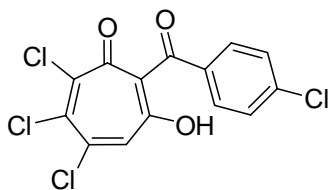

**(2Z,4E,6E)-2,3,4-Trichloro-7-(4-chlorobenzoyl)-6-hydroxycyclohepta-2,4,6-trienone**

**(4d).**  $^1\text{H}$  NMR (ppm)  $\delta$  7.49(d,  $J = 8.4\text{Hz}$ , 2H), 7.41(d,  $J = 8.4\text{Hz}$ , 2H), 7.23(s, 1H);  $^{13}\text{C}$  NMR (ppm)  $\delta$  198.9, 181.3, 168.8, 141.5, 140.9, 139.2, 135.1, 134.9, 129.5, 128.9, 128.2, 115.2; MS(EI)  $m/z$ (%): 382( $\text{M}^+$ ), 364, 336, 299, 248, 222, 167, 149, 139, 119, 111, 91, 71, 57, 43(100), 41, 28; HRMS(ESI) calcd for  $\text{C}_{14}\text{H}_6\text{Cl}_4\text{O}_3$  ( $\text{M}^+\text{+Na}$ ): 384.8963; found: 384.8970.

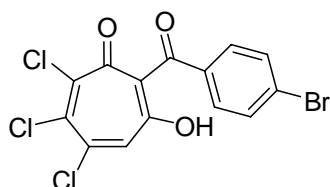

**(2Z,4E,6E)-7-(4-Bromobenzoyl)-2,3,4-trichloro-6-hydroxycyclohepta-2,4,6-trienone**

**(4e).**  $^1\text{H}$  NMR (ppm)  $\delta$  7.59-7.57(m, 2H), 7.42-7.40(m, 2H), 7.23(s, 1H);  $^{13}\text{C}$  NMR (ppm)  $\delta$  199.1, 181.2, 168.9, 141.6, 141.0, 135.3, 135.1, 131.8, 129.5, 128.2, 127.8, 115.2; MS(EI)  $m/z$ (%): 408( $\text{M}^+$ ), 406, 380, 377, 363, 345, 327, 309, 299, 282, 264, 250, 236, 224, 207, 196, 183(100), 167, 155, 139, 131, 111, 97, 84, 76, 50; HRMS(ESI) calcd for  $\text{C}_{14}\text{H}_6\text{BrCl}_3\text{O}_3$  ( $\text{M}^+\text{+H}$ ): 406.9639; found: 406.8638.

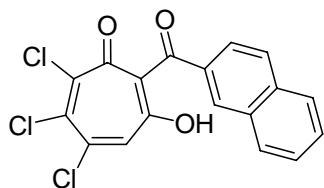

**(2Z,4E,6E)-7-(2-naphthoyl)-2,3,4-trichloro-6-hydroxycyclohepta-2,4,6-trienone (4f).**

$^1\text{H}$  NMR (ppm)  $\delta$  8.05(s, 1H), 7.87-7.83(m, 3H), 7.60-7.51(m, 3H), 7.21(s, 1H);  $^{13}\text{C}$  NMR (ppm)  $\delta$  199.9, 181.6, 168.4, 141.1, 140.7, 135.3, 134.8, 133.5, 132.2, 129.8, 129.2, 128.6, 128.5, 128.3, 127.8, 127.0, 124.0, 115.5; MS(EI)  $m/z$ (%): 378( $\text{M}^+$ ), 351, 279, 250, 248, 223, 205, 189, 184, 170, 155, 149, 127(100), 115, 101, 93, 77, 63, 57; HRMS(ESI) calcd for  $\text{C}_{18}\text{H}_9\text{Cl}_3\text{O}_3$  ( $\text{M}^+\text{+Na}$ ): 400.9510; found: 400.9509.

## References:

- (1) H. Kogler, H.-W. Fehlhaber, K. Leube, W. Durckheimer, *Chem. Ber.* 1989, **122**, 2205-2206.
- (2) R. V. Linko, V. K. Belsky, A. V. Varlamov, B. E. Zaitsev, A. I. Chernyshev, *Russ. Chem. Bull. Int. Ed.* 2001, **50**, 1625-1629.

## 2) X-ray crystallography data for 4b

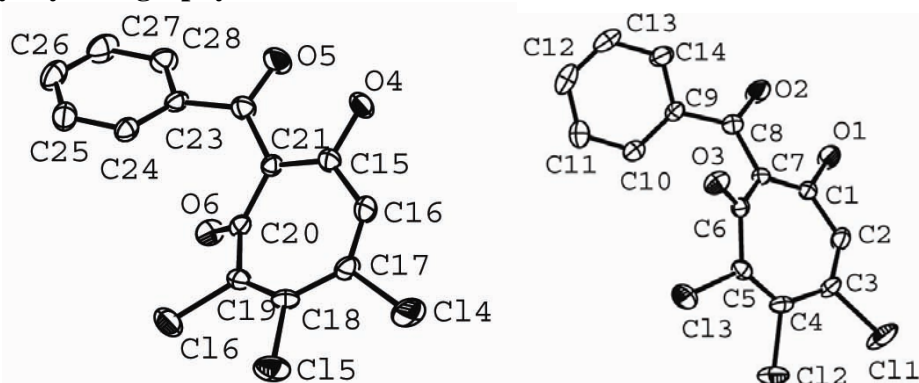

**Fig. 1** ORTEP drawing of **4b** with 30% thermal ellipsoids.  
Hydrogen atoms omitted for clarity.

(**Note:** Intramolecular hydrogen bonding is responsible for the two configurations of troponone **4b** as shown in Fig. 1. The two configurations break the symmetry and change the crystal system to triclinic.)

**Table 1.** Crystal data and structure refinement for **4b**.

|                      |                                                               |                |
|----------------------|---------------------------------------------------------------|----------------|
| Identification code  | lzpa                                                          |                |
| Empirical formula    | C <sub>14</sub> H <sub>7</sub> Cl <sub>3</sub> O <sub>3</sub> |                |
| Formula weight       | 329.55                                                        |                |
| Temperature          | 293(2) K                                                      |                |
| Wavelength           | 0.71073 Å                                                     |                |
| Crystal system       | Triclinic                                                     |                |
| Space group          | P-1                                                           |                |
| Unit cell dimensions | a = 4.1248(8) Å                                               | α = 62.21(3) ° |
|                      | b = 18.813(4) Å                                               | β = 89.89(3) ° |
|                      | c = 19.845(4) Å                                               | γ = 89.83(3) ° |

|                                   |                                             |
|-----------------------------------|---------------------------------------------|
| Volume                            | 1362.3(5) Å <sup>3</sup>                    |
| Z                                 | 4                                           |
| Density (calculated)              | 1.607 Mg/m <sup>3</sup>                     |
| Absorption coefficient            | 0.674 mm <sup>-1</sup>                      |
| F(000)                            | 664                                         |
| Crystal size                      | 0.50 x 0.30 x 0.20 mm <sup>3</sup>          |
| Theta range for data collection   | 1.16 to 27.48°.                             |
| Index ranges                      | -5<=h<=5, -24<=k<=24, -25<=l<=22            |
| Reflections collected             | 12452                                       |
| Independent reflections           | 6165 [R(int) = 0.0332]                      |
| Completeness to theta = 27.48°    | 98.1 %                                      |
| Absorption correction             | Empirical                                   |
| Max. and min. transmission        | 0.8769 and 0.7291                           |
| Refinement method                 | Full-matrix least-squares on F <sup>2</sup> |
| Data / restraints / parameters    | 6165 / 1 / 369                              |
| Goodness-of-fit on F <sup>2</sup> | 1.058                                       |
| Final R indices [I>2sigma(I)]     | R1 = 0.0417, wR2 = 0.0724                   |
| R indices (all data)              | R1 = 0.1080, wR2 = 0.0780                   |
| Largest diff. peak and hole       | 0.241 and -0.354 e. Å <sup>-3</sup>         |

**Table 2.** Atomic coordinates ( x 10<sup>4</sup>) and equivalent isotropic displacement parameters (Å<sup>2</sup> x 10<sup>3</sup>) for **4b**. U(eq) is defined as one third of the trace of the orthogonalized U<sup>ij</sup> tensor.

|      | x       | y       | z       | U(eq) |
|------|---------|---------|---------|-------|
| C(1) | 3334(6) | 674(2)  | 570(2)  | 41(1) |
| C(2) | 2784(6) | -175(2) | 955(2)  | 49(1) |
| C(3) | 2903(6) | -701(1) | 1693(2) | 44(1) |
| C(4) | 3688(6) | -564(1) | 2328(1) | 41(1) |
| C(5) | 5182(6) | 102(2)  | 2278(1) | 38(1) |
| C(6) | 6445(6) | 816(1)  | 1585(1) | 34(1) |
| C(7) | 4801(6) | 1143(1) | 851(1)  | 35(1) |
| C(8) | 4949(6) | 2026(2) | 349(2)  | 45(1) |
| C(9) | 5512(6) | 2623(1) | 621(2)  | 38(1) |

|       |          |          |         |       |
|-------|----------|----------|---------|-------|
| C(10) | 4384(6)  | 2524(2)  | 1315(2) | 44(1) |
| C(11) | 4736(6)  | 3154(2)  | 1494(2) | 56(1) |
| C(12) | 6202(7)  | 3863(2)  | 987(2)  | 67(1) |
| C(13) | 7324(7)  | 3954(2)  | 307(2)  | 65(1) |
| C(14) | 6967(6)  | 3338(2)  | 115(2)  | 52(1) |
| C(15) | 1652(6)  | 5675(2)  | 5570(2) | 43(1) |
| C(16) | 2238(6)  | 4823(2)  | 5956(2) | 49(1) |
| C(17) | 2097(6)  | 4302(1)  | 6697(2) | 44(1) |
| C(18) | 1306(6)  | 4441(1)  | 7330(1) | 39(1) |
| C(19) | -165(6)  | 5105(2)  | 7272(1) | 37(1) |
| C(20) | -1454(6) | 5817(1)  | 6583(1) | 35(1) |
| C(21) | 217(6)   | 6143(1)  | 5848(1) | 35(1) |
| C(22) | 43(6)    | 7023(2)  | 5350(2) | 45(1) |
| C(23) | -502(6)  | 7619(1)  | 5623(2) | 39(1) |
| C(24) | 618(6)   | 7529(2)  | 6314(2) | 42(1) |
| C(25) | 282(7)   | 8145(2)  | 6499(2) | 55(1) |
| C(26) | -1203(7) | 8860(2)  | 5989(2) | 64(1) |
| C(27) | -2309(7) | 8954(2)  | 5307(2) | 67(1) |
| C(28) | -1977(6) | 8342(2)  | 5113(2) | 52(1) |
| Cl(1) | 1931(2)  | -1681(1) | 1908(1) | 91(1) |
| Cl(2) | 2643(2)  | -1314(1) | 3220(1) | 70(1) |
| Cl(3) | 6007(2)  | 178(1)   | 3088(1) | 67(1) |
| Cl(4) | 3074(2)  | 3321(1)  | 6907(1) | 91(1) |
| Cl(5) | 2355(2)  | 3686(1)  | 8220(1) | 70(1) |
| Cl(6) | -1009(2) | 5178(1)  | 8087(1) | 68(1) |
| O(1)  | 2309(5)  | 990(1)   | -148(1) | 69(1) |
| O(2)  | 4390(6)  | 2284(1)  | -342(1) | 82(1) |
| O(3)  | 8827(4)  | 1158(1)  | 1662(1) | 49(1) |
| O(4)  | 2701(5)  | 5990(1)  | 4851(1) | 68(1) |
| O(5)  | 622(6)   | 7285(1)  | 4659(1) | 82(1) |
| O(6)  | -3831(4) | 6158(1)  | 6664(1) | 49(1) |
| H(2)  | 2256     | -396     | 637     | 59    |
| H(10) | 3406     | 2045     | 1657    | 53    |
| H(11) | 3977     | 3096     | 1958    | 67    |
| H(12) | 6423     | 4280     | 1112    | 80    |
| H(13) | 8333     | 4430     | -30     | 78    |

|       |          |          |          |         |
|-------|----------|----------|----------|---------|
| H(14) | 7704     | 3405     | -354     | 62      |
| H(16) | 2803     | 4601     | 5641     | 59      |
| H(24) | 1600     | 7050     | 6656     | 51      |
| H(25) | 1046     | 8084     | 6963     | 66      |
| H(26) | -1439    | 9276     | 6115     | 77      |
| H(27) | -3296    | 9434     | 4970     | 80      |
| H(28) | -2731    | 8410     | 4645     | 62      |
| H(1)  | 3020(90) | 1580(30) | -340(20) | 138(15) |
| H(4)  | 1940(80) | 6539(13) | 4640(20) | 129(14) |

**Table 3.** Bond lengths [ $\text{\AA}$ ] and angles [ $^\circ$ ] for **4b**.

|             |          |             |          |
|-------------|----------|-------------|----------|
| C(1)-O(1)   | 1.331(3) | C(12)-H(12) | 0.9300   |
| C(1)-C(7)   | 1.385(3) | C(13)-C(14) | 1.387(4) |
| C(1)-C(2)   | 1.433(3) | C(13)-H(13) | 0.9300   |
| C(2)-C(3)   | 1.332(4) | C(14)-H(14) | 0.9300   |
| C(2)-H(2)   | 0.9300   | C(15)-O(4)  | 1.336(3) |
| C(3)-C(4)   | 1.438(4) | C(15)-C(21) | 1.372(3) |
| C(3)-Cl(1)  | 1.736(3) | C(15)-C(16) | 1.438(3) |
| C(4)-C(5)   | 1.358(3) | C(16)-C(17) | 1.335(4) |
| C(4)-Cl(2)  | 1.726(3) | C(16)-H(16) | 0.9300   |
| C(5)-C(6)   | 1.499(3) | C(17)-C(18) | 1.435(4) |
| C(5)-Cl(3)  | 1.713(3) | C(17)-Cl(4) | 1.738(2) |
| C(6)-O(3)   | 1.224(3) | C(18)-C(19) | 1.343(3) |
| C(6)-C(7)   | 1.458(3) | C(18)-Cl(5) | 1.728(2) |
| C(7)-C(8)   | 1.488(3) | C(19)-C(20) | 1.496(3) |
| C(8)-O(2)   | 1.244(3) | C(19)-Cl(6) | 1.720(3) |
| C(8)-C(9)   | 1.476(3) | C(20)-O(6)  | 1.222(3) |
| C(9)-C(10)  | 1.380(3) | C(20)-C(21) | 1.463(3) |
| C(9)-C(14)  | 1.385(3) | C(21)-C(22) | 1.482(3) |
| C(10)-C(11) | 1.395(3) | C(22)-O(5)  | 1.244(3) |
| C(10)-H(10) | 0.9300   | C(22)-C(23) | 1.472(3) |
| C(11)-C(12) | 1.381(4) | C(23)-C(24) | 1.382(3) |
| C(11)-H(11) | 0.9300   | C(23)-C(28) | 1.399(3) |
| C(12)-C(13) | 1.360(4) | C(24)-C(25) | 1.375(3) |

|                 |            |                   |            |
|-----------------|------------|-------------------|------------|
| C(24)-H(24)     | 0.9300     | C(10)-C(9)-C(14)  | 120.3(2)   |
| C(25)-C(26)     | 1.392(4)   | C(10)-C(9)-C(8)   | 122.6(2)   |
| C(25)-H(25)     | 0.9300     | C(14)-C(9)-C(8)   | 116.8(2)   |
| C(26)-C(27)     | 1.359(4)   | C(9)-C(10)-C(11)  | 118.8(3)   |
| C(26)-H(26)     | 0.9300     | C(9)-C(10)-H(10)  | 120.6      |
| C(27)-C(28)     | 1.381(4)   | C(11)-C(10)-H(10) | 120.6      |
| C(27)-H(27)     | 0.9300     | C(12)-C(11)-C(10) | 120.6(3)   |
| C(28)-H(28)     | 0.9300     | C(12)-C(11)-H(11) | 119.7      |
| O(1)-H(1)       | 1.03(5)    | C(10)-C(11)-H(11) | 119.7      |
| O(2)-H(1)       | 1.44(5)    | C(13)-C(12)-C(11) | 120.2(3)   |
| O(4)-H(4)       | 0.968(19)  | C(13)-C(12)-H(12) | 119.9      |
|                 |            | C(11)-C(12)-H(12) | 119.9      |
| O(1)-C(1)-C(7)  | 121.4(2)   | C(12)-C(13)-C(14) | 120.1(3)   |
| O(1)-C(1)-C(2)  | 110.4(2)   | C(12)-C(13)-H(13) | 119.9      |
| C(7)-C(1)-C(2)  | 128.1(2)   | C(14)-C(13)-H(13) | 119.9      |
| C(3)-C(2)-C(1)  | 130.7(3)   | C(9)-C(14)-C(13)  | 120.0(3)   |
| C(3)-C(2)-H(2)  | 114.7      | C(9)-C(14)-H(14)  | 120.0      |
| C(1)-C(2)-H(2)  | 114.7      | C(13)-C(14)-H(14) | 120.0      |
| C(2)-C(3)-C(4)  | 128.9(2)   | O(4)-C(15)-C(21)  | 121.4(2)   |
| C(2)-C(3)-Cl(1) | 114.8(2)   | O(4)-C(15)-C(16)  | 110.2(2)   |
| C(4)-C(3)-Cl(1) | 116.2(2)   | C(21)-C(15)-C(16) | 128.5(2)   |
| C(5)-C(4)-C(3)  | 125.1(2)   | C(17)-C(16)-C(15) | 130.1(3)   |
| C(5)-C(4)-Cl(2) | 118.3(2)   | C(17)-C(16)-H(16) | 114.9      |
| C(3)-C(4)-Cl(2) | 116.54(19) | C(15)-C(16)-H(16) | 114.9      |
| C(4)-C(5)-C(6)  | 128.9(2)   | C(16)-C(17)-C(18) | 129.3(2)   |
| C(4)-C(5)-Cl(3) | 120.0(2)   | C(16)-C(17)-Cl(4) | 114.0(2)   |
| C(6)-C(5)-Cl(3) | 111.07(19) | C(18)-C(17)-Cl(4) | 116.6(2)   |
| O(3)-C(6)-C(7)  | 119.8(2)   | C(19)-C(18)-C(17) | 124.7(2)   |
| O(3)-C(6)-C(5)  | 117.7(2)   | C(19)-C(18)-Cl(5) | 119.2(2)   |
| C(7)-C(6)-C(5)  | 122.3(2)   | C(17)-C(18)-Cl(5) | 116.14(19) |
| C(1)-C(7)-C(6)  | 123.7(2)   | C(18)-C(19)-C(20) | 129.6(2)   |
| C(1)-C(7)-C(8)  | 118.1(2)   | C(18)-C(19)-Cl(6) | 119.2(2)   |
| C(6)-C(7)-C(8)  | 118.0(2)   | C(20)-C(19)-Cl(6) | 111.05(19) |
| O(2)-C(8)-C(9)  | 117.4(2)   | O(6)-C(20)-C(21)  | 120.4(2)   |
| O(2)-C(8)-C(7)  | 118.1(2)   | O(6)-C(20)-C(19)  | 117.7(2)   |
| C(9)-C(8)-C(7)  | 124.4(2)   | C(21)-C(20)-C(19) | 121.7(2)   |

|                   |          |                   |           |
|-------------------|----------|-------------------|-----------|
| C(15)-C(21)-C(20) | 123.6(2) | C(26)-C(25)-H(25) | 120.1     |
| C(15)-C(21)-C(22) | 118.6(2) | C(27)-C(26)-C(25) | 120.3(3)  |
| C(20)-C(21)-C(22) | 117.6(2) | C(27)-C(26)-H(26) | 119.8     |
| O(5)-C(22)-C(23)  | 117.1(2) | C(25)-C(26)-H(26) | 119.8     |
| O(5)-C(22)-C(21)  | 118.1(2) | C(26)-C(27)-C(28) | 120.5(3)  |
| C(23)-C(22)-C(21) | 124.5(2) | C(26)-C(27)-H(27) | 119.7     |
| C(24)-C(23)-C(28) | 119.5(2) | C(28)-C(27)-H(27) | 119.7     |
| C(24)-C(23)-C(22) | 123.6(2) | C(27)-C(28)-C(23) | 119.7(3)  |
| C(28)-C(23)-C(22) | 116.7(2) | C(27)-C(28)-H(28) | 120.2     |
| C(25)-C(24)-C(23) | 120.2(3) | C(23)-C(28)-H(28) | 120.2     |
| C(25)-C(24)-H(24) | 119.9    | C(1)-O(1)-H(1)    | 100(2)    |
| C(23)-C(24)-H(24) | 119.9    | C(8)-O(2)-H(1)    | 100.4(16) |
| C(24)-C(25)-C(26) | 119.9(3) | C(15)-O(4)-H(4)   | 102(2)    |
| C(24)-C(25)-H(25) | 120.1    |                   |           |

---

Symmetry transformations used to generate equivalent atoms:

**Table 4.** Anisotropic displacement parameters ( $\text{\AA}^2 \times 10^3$ ) for **4b**. The anisotropic displacement factor exponent takes the form:  $-2\pi^2 [h^2 a^{*2} U^{11} + \dots + 2 h k a^* b^* U^{12}]$

|       | U <sup>11</sup> | U <sup>22</sup> | U <sup>33</sup> | U <sup>23</sup> | U <sup>13</sup> | U <sup>12</sup> |
|-------|-----------------|-----------------|-----------------|-----------------|-----------------|-----------------|
| C(1)  | 62(2)           | 33(2)           | 29(2)           | -14(1)          | 2(1)            | -3(1)           |
| C(2)  | 67(2)           | 38(2)           | 47(2)           | -25(2)          | -5(1)           | -2(1)           |
| C(3)  | 53(2)           | 24(1)           | 50(2)           | -13(1)          | -6(1)           | -3(1)           |
| C(4)  | 39(2)           | 31(2)           | 38(2)           | -3(1)           | 3(1)            | 1(1)            |
| C(5)  | 36(2)           | 42(2)           | 32(1)           | -15(1)          | -1(1)           | 6(1)            |
| C(6)  | 33(2)           | 31(1)           | 40(2)           | -17(1)          | 4(1)            | 5(1)            |
| C(7)  | 41(2)           | 29(1)           | 30(1)           | -11(1)          | 5(1)            | 1(1)            |
| C(8)  | 56(2)           | 37(2)           | 39(2)           | -14(1)          | 2(1)            | -1(1)           |
| C(9)  | 41(2)           | 29(1)           | 41(2)           | -15(1)          | -3(1)           | 0(1)            |
| C(10) | 42(2)           | 37(2)           | 52(2)           | -19(1)          | 1(1)            | -1(1)           |
| C(11) | 53(2)           | 62(2)           | 68(2)           | -43(2)          | -4(2)           | 9(2)            |
| C(12) | 67(2)           | 49(2)           | 99(3)           | -46(2)          | -17(2)          | 2(2)            |
| C(13) | 67(2)           | 34(2)           | 84(3)           | -19(2)          | 2(2)            | -13(1)          |
| C(14) | 59(2)           | 37(2)           | 52(2)           | -14(2)          | 3(1)            | -8(1)           |
| C(15) | 61(2)           | 36(2)           | 32(2)           | -14(1)          | -2(1)           | 4(1)            |
| C(16) | 66(2)           | 38(2)           | 49(2)           | -24(2)          | 3(1)            | 7(1)            |
| C(17) | 53(2)           | 26(2)           | 49(2)           | -13(1)          | 3(1)            | 7(1)            |
| C(18) | 38(2)           | 34(2)           | 32(2)           | -3(1)           | -2(1)           | 2(1)            |
| C(19) | 35(2)           | 40(2)           | 32(1)           | -14(1)          | 3(1)            | -5(1)           |
| C(20) | 36(2)           | 30(1)           | 39(2)           | -16(1)          | -3(1)           | -4(1)           |
| C(21) | 41(2)           | 27(1)           | 33(1)           | -13(1)          | -5(1)           | 4(1)            |
| C(22) | 56(2)           | 39(2)           | 36(2)           | -14(1)          | 0(1)            | 6(1)            |
| C(23) | 44(2)           | 25(1)           | 44(2)           | -12(1)          | 6(1)            | 0(1)            |
| C(24) | 42(2)           | 34(2)           | 51(2)           | -20(1)          | 3(1)            | 2(1)            |
| C(25) | 55(2)           | 60(2)           | 65(2)           | -40(2)          | 7(2)            | -7(2)           |
| C(26) | 64(2)           | 47(2)           | 95(3)           | -44(2)          | 18(2)           | -4(2)           |
| C(27) | 67(2)           | 38(2)           | 87(3)           | -23(2)          | 6(2)            | 13(1)           |
| C(28) | 58(2)           | 40(2)           | 48(2)           | -14(2)          | -1(1)           | 8(1)            |
| Cl(1) | 141(1)          | 30(1)           | 85(1)           | -13(1)          | -26(1)          | -17(1)          |
| Cl(2) | 84(1)           | 52(1)           | 45(1)           | 3(1)            | 7(1)            | -14(1)          |
| Cl(3) | 90(1)           | 72(1)           | 40(1)           | -27(1)          | -2(1)           | -5(1)           |
| Cl(4) | 141(1)          | 32(1)           | 83(1)           | -13(1)          | 28(1)           | 20(1)           |
| Cl(5) | 85(1)           | 52(1)           | 45(1)           | 2(1)            | -5(1)           | 15(1)           |
| Cl(6) | 92(1)           | 73(1)           | 39(1)           | -27(1)          | 4(1)            | 7(1)            |
| O(1)  | 127(2)          | 43(1)           | 36(1)           | -18(1)          | -15(1)          | -7(1)           |



|      |        |       |       |        |        |        |
|------|--------|-------|-------|--------|--------|--------|
| O(2) | 165(2) | 38(1) | 32(1) | -8(1)  | -14(1) | -14(1) |
| O(3) | 35(1)  | 44(1) | 64(1) | -21(1) | -4(1)  | -3(1)  |
| O(4) | 126(2) | 43(1) | 33(1) | -16(1) | 15(1)  | 11(1)  |
| O(5) | 161(2) | 37(1) | 35(1) | -7(1)  | 13(1)  | 17(1)  |
| O(6) | 35(1)  | 47(1) | 63(1) | -23(1) | 6(1)   | 5(1)   |

---

**3) Copies of  $^1\text{H}$  NMR and  $^{13}\text{C}$  NMR spectra for all compounds**

7.873  
7.871  
7.859  
7.857  
7.617  
7.616  
7.605  
7.595  
7.478  
7.465  
7.451  
7.261

4.185  
4.157  
3.972  
3.943  
3.597

0.000

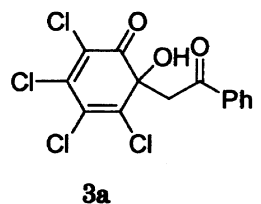

DFILE C:\DOCUME~1\nmr\LOCALS~1\Te  
COMNT lee-R867-0H  
DATIM 11-02-2009 21:14:54  
OBNUC 1H  
EXMOD single\_pulse.ex2  
OBFREQ 600.17 MHz  
OBSET 5.30 KHz  
OBFIN 5.47 Hz  
POINT 32768  
FREQU 11261.26 Hz  
SCANS 8  
ACQTM 2.9098 sec  
PD 5.0000 sec  
PW1 6.90 usec  
IRNUC 1H  
CTEMP 18.9 c  
SLVNT CDCL3  
EXREF 0.00 ppm  
BF 0.12 Hz  
RGAIN 50

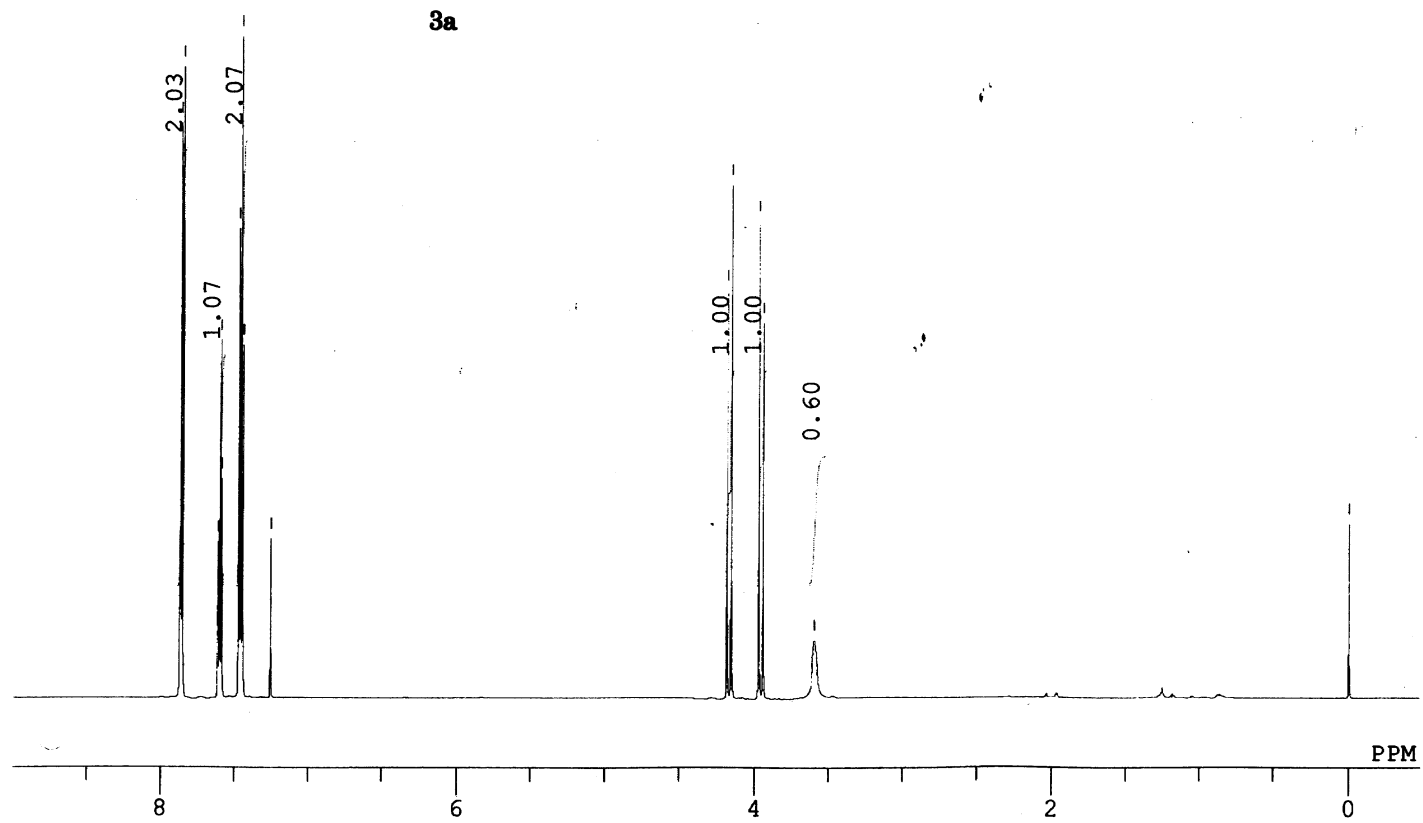

C:\DOCUME~1\nmr\LOCALS~1\Temp\lee-R867-0C-1.jdf  
single pulse decoupled gated NOE

196.130  
189.619

145.173  
138.250  
135.004  
134.315  
129.767  
128.876  
128.302  
127.641

77.249  
77.029  
76.818  
76.349

51.321

0.000

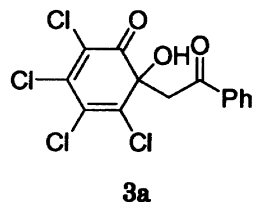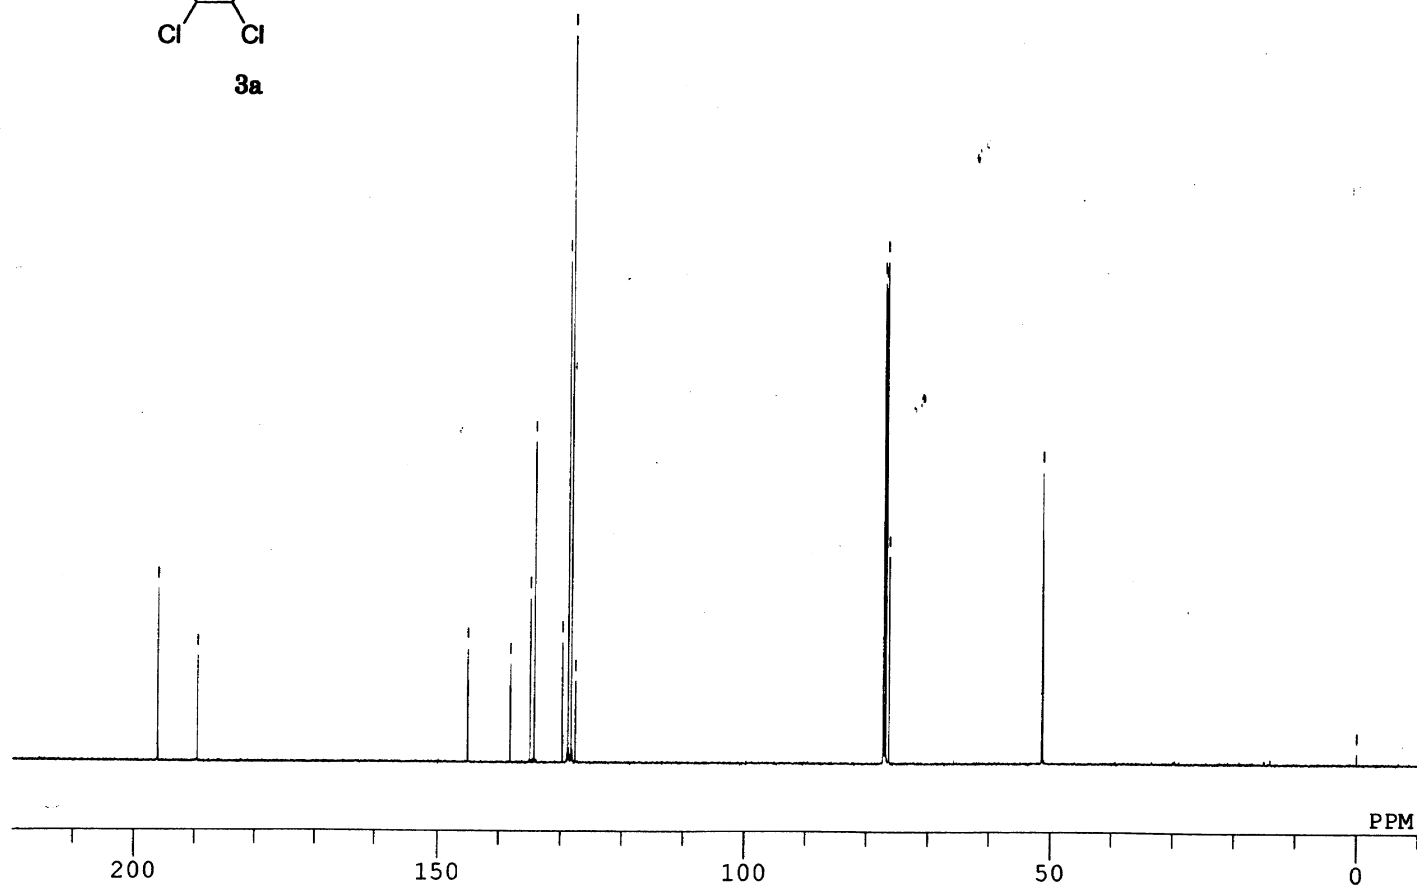

DFILE C:\DOCUME~1\nmr\LOCALS~1\Te  
COMNT single pulse decoupled gate  
DATIM 11-02-2009 22:46:55  
OBNUC 13C  
EXMOD single\_pulse\_dec  
OBFRQ 150.92 MHz  
OBSET 8.52 KHz  
OBFIN 1.74 Hz  
POINT 32768  
FREQU 47348.49 Hz  
SCANS 2000  
ACQTM 0.6921 sec  
PD 2.0000 sec  
PW1 4.17 usec  
IRNUC 1H  
CTEMP 19.8 c  
SLVNT CDCL3  
EXREF 0.00 ppm  
BF 1.20 Hz  
RGAIN 50

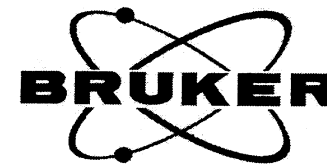

NAME guoxw-lihj-788+-20081211  
EXPNO 1  
PROCNO 1  
Date\_ 20081211  
Time 14.37  
INSTRUM spect  
PROBHD 5 mm PABBO BB-  
PULPROG zg30  
TD 65536  
SOLVENT CDCl3  
NS 8  
DS 2  
SWH 8223.685 Hz  
FIDRES 0.125483 Hz  
AQ 3.9846387 sec  
RG 101  
DW 60.800 usec  
DE 6.50 usec  
TE 291.7 K  
D1 1.00000000 sec  
TD0 1

===== CHANNEL f1 =====  
NUC1 1H  
P1 12.30 usec  
PL1 -1.00 dB  
PL1W 17.01305389 W  
SFO1 400.1324710 MHz  
SI 32768  
SF 400.1300259 MHz  
WDW EM  
SSB 0  
LB 0.30 Hz  
GB 0  
PC 1.00

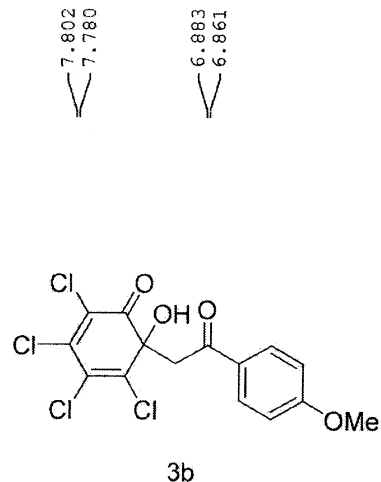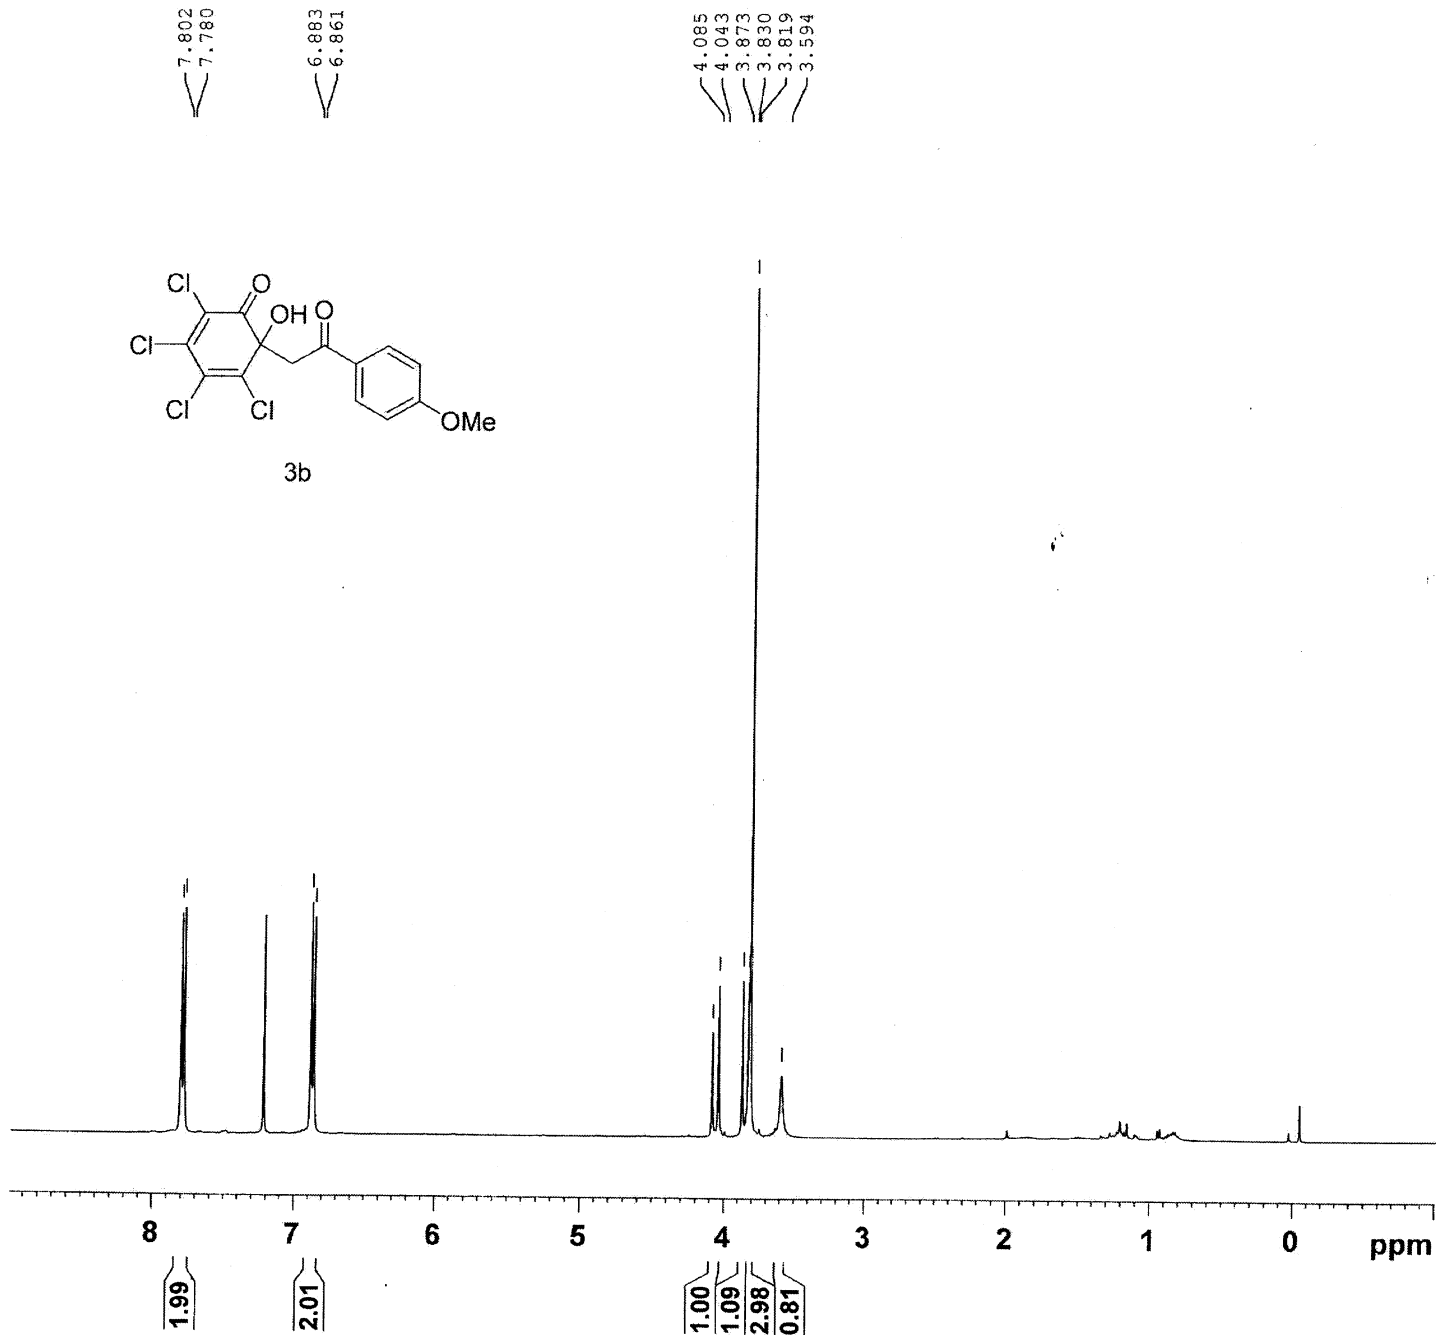

— 194.430  
 — 189.625  
 — 164.426  
 — 144.908  
 — 138.497  
 — 130.762  
 — 129.806  
 — 128.236  
 — 127.458  
 — 114.078

77.370  
 77.053  
 76.734

— 55.611  
 — 51.002

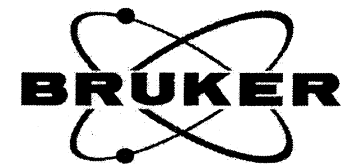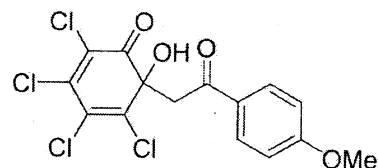

3b

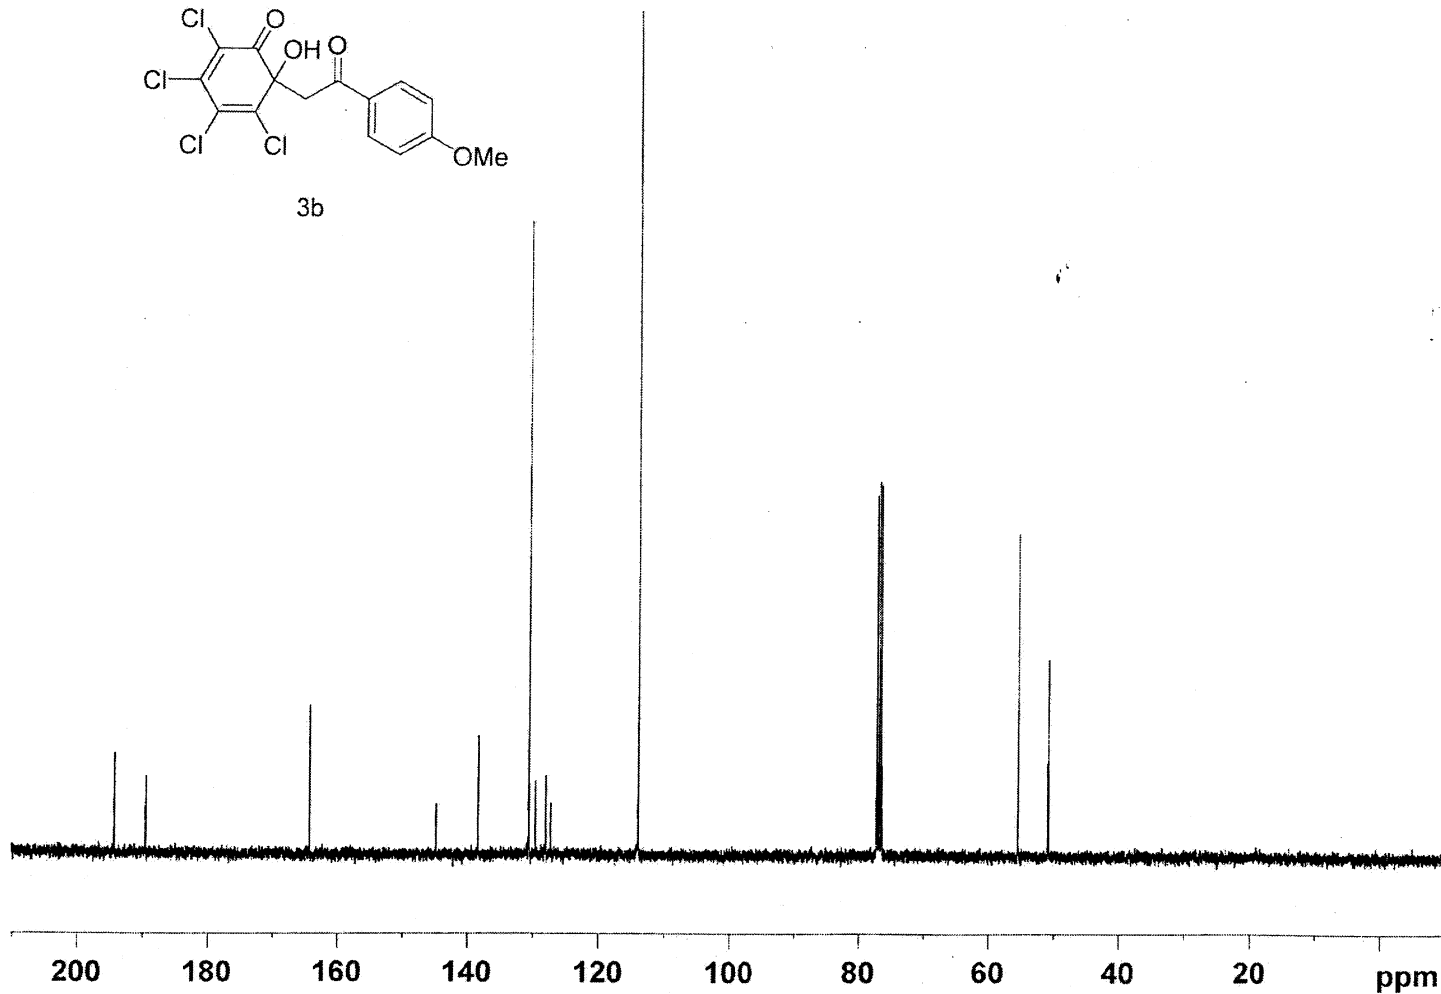

```

NAME      guoxw-lihj-788-20081212
EXPNO     2
PROCNO    1
Date_     20081212
Time      10.44
INSTRUM   spect
PROBHD    5 mm PABBO BB-
PULPROG   zgpg30
TD         65536
SOLVENT   CDCl3
NS         161
DS         4
SWH        24038.461 Hz
FIDRES     0.366798 Hz
AQ         1.3631988 sec
RG         80.6
DW         20.800 usec
DE         6.50 usec
TE         292.6 K
D1         2.00000000 sec
D11        0.03000000 sec
TD0        1
  
```

```

===== CHANNEL f1 =====
NUC1       13C
P1         12.80 usec
PL1        2.00 dB
PL1W       55.31277084 W
SFO1       100.6228298 MHz
  
```

```

===== CHANNEL f2 =====
CPDPRG2    waltz16
NUC2        1H
PCPD2       80.00 usec
PL2         -1.00 dB
PL12        15.50 dB
PL13        15.50 dB
PL2W        17.01305389 W
PL12W       0.38087484 W
PL13W       0.38087484 W
SFO2        400.1316005 MHz
SI          32768
SF          100.6127744 MHz
WDW         EM
SSB         0
LB          1.00 Hz
GB          0
PC          1.40
  
```

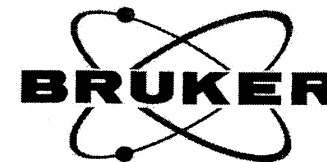

NAME guoxw-lihj-798-20081215  
EXPNO 1  
PROCNO 1  
Date\_ 20081215  
Time\_ 16.39  
INSTRUM spect  
PROBHD 5 mm PABBO BB-  
PULPROG zg30  
TD 65536  
SOLVENT CDCl3  
NS 8  
DS 2  
SWH 8223.685 Hz  
FIDRES 0.125483 Hz  
AQ 3.9846387 sec  
RG 71.8  
DW 60.800 usec  
DE 6.50 usec  
TE 292.4 K  
D1 1.00000000 sec  
TDO 1

==== CHANNEL f1 =====  
NUC1 1H  
P1 12.30 usec  
PL1 -1.00 dB  
PLW 17.01305389 W  
SF01 400.1324710 MHz  
SI 32768  
SF 400.1300000 MHz  
WDW EM  
SSE 0  
LB 0.30 Hz  
GB 0  
PC 1.00

22

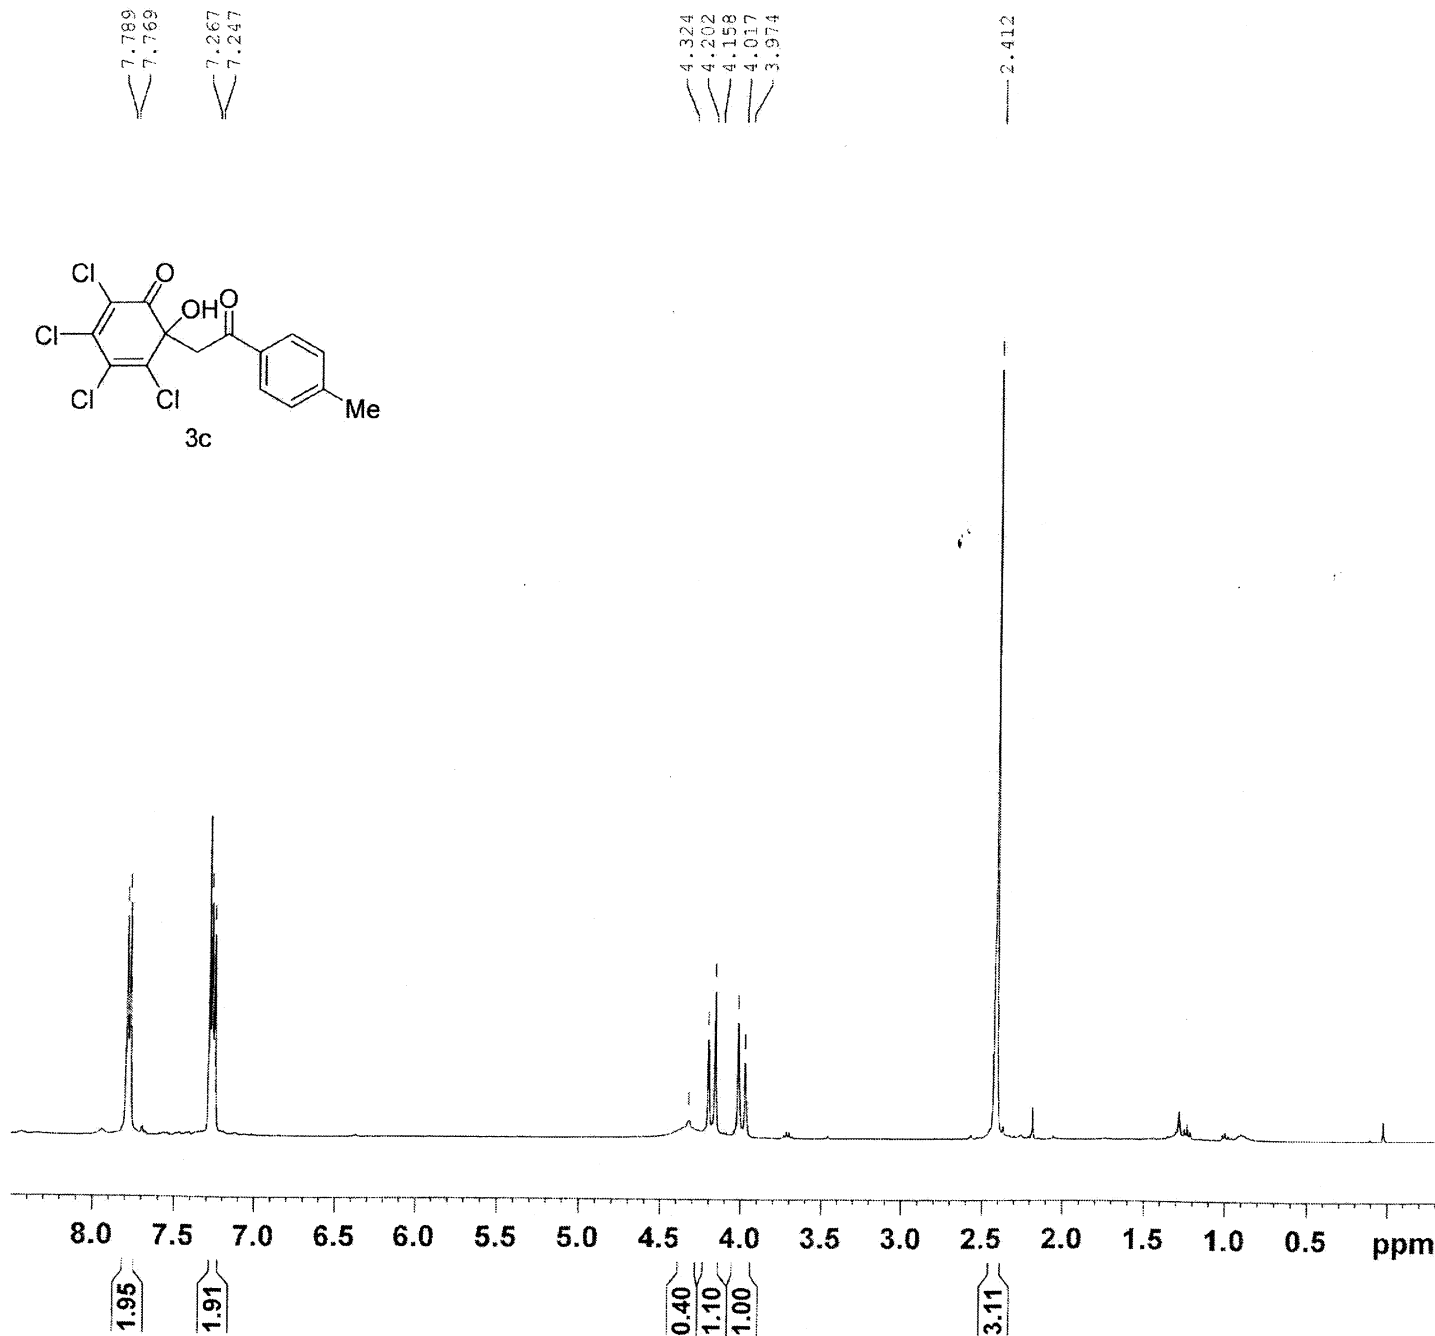

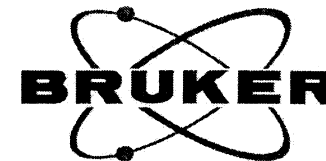

NAME guoxw-lihj-798-20081215  
EXPNO 2  
PROCNO 1  
Date\_ 20081215  
Time\_ 16.37  
INSTRUM spect  
PROBHD 5 mm PABBO BB-  
PULPROG zgpg30  
TD 65536  
SOLVENT CDC13  
NS 88  
DS 4  
SWH 24038.461 Hz  
FIDRES 0.366798 Hz  
AQ 1.3631988 sec  
RG 80.6  
DW 20.800 usec  
DE 6.50 usec  
TE 292.8 K  
D1 2.00000000 sec  
D11 0.03000000 sec  
TD0 1

===== CHANNEL f1 =====  
NUC1 13C  
P1 12.00 usec  
PL1 2.00 dB  
PL1W 55.31277084 W  
SFO1 100.6228298 MHz

===== CHANNEL f2 =====  
CPDPRG2 waltz16  
NUC2 1H  
PCPD2 80.00 usec  
PL2 -1.00 dB  
PL12 15.50 dB  
PL13 15.50 dB  
PL2W 17.01305389 W  
PL12W 0.38087484 W  
PL13W 0.38087484 W  
SFO2 400.1316005 MHz  
SI 32768  
SF 100.6127798 MHz  
WDW EM  
SSB 0  
LB 1.00 Hz  
GB 0  
PC 1.40

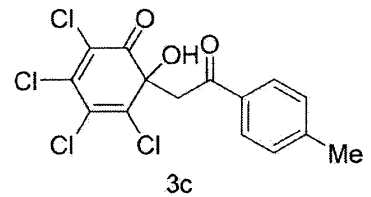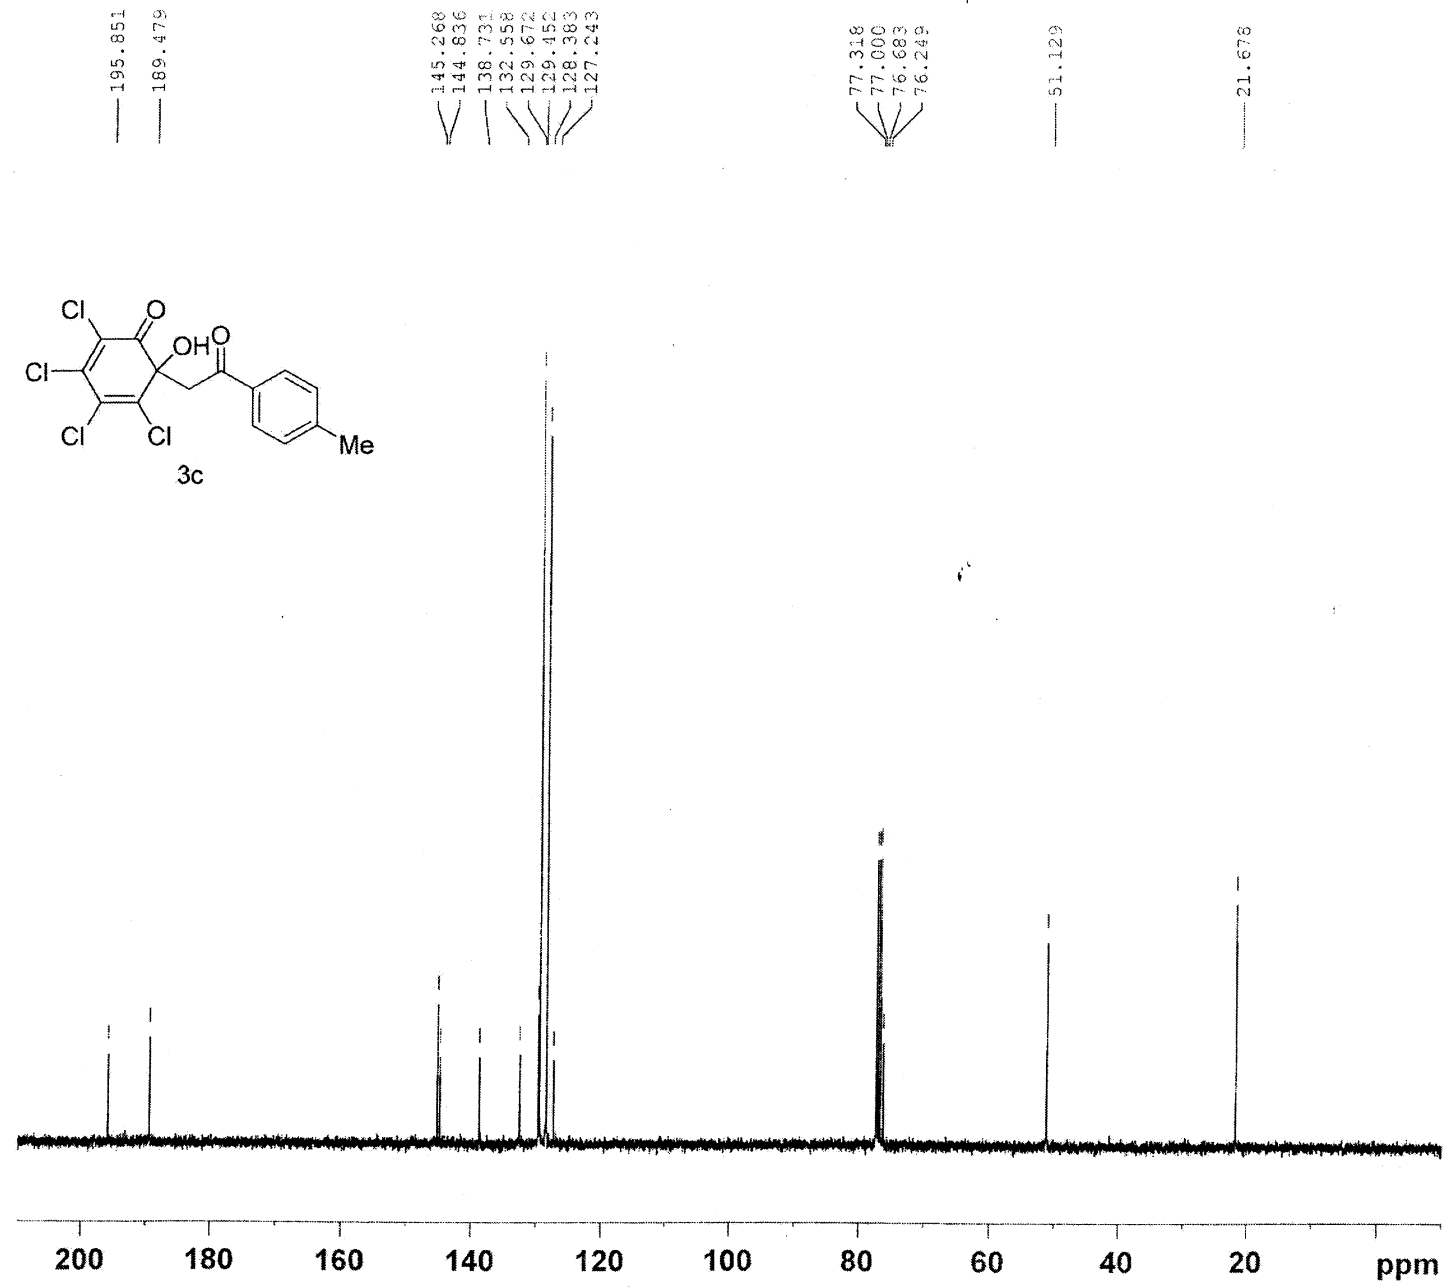

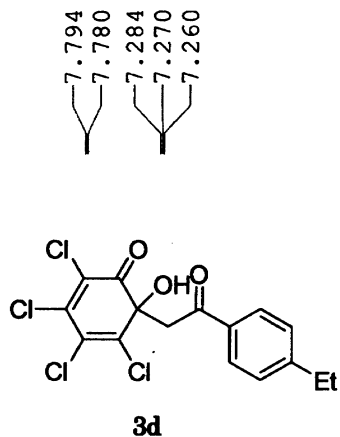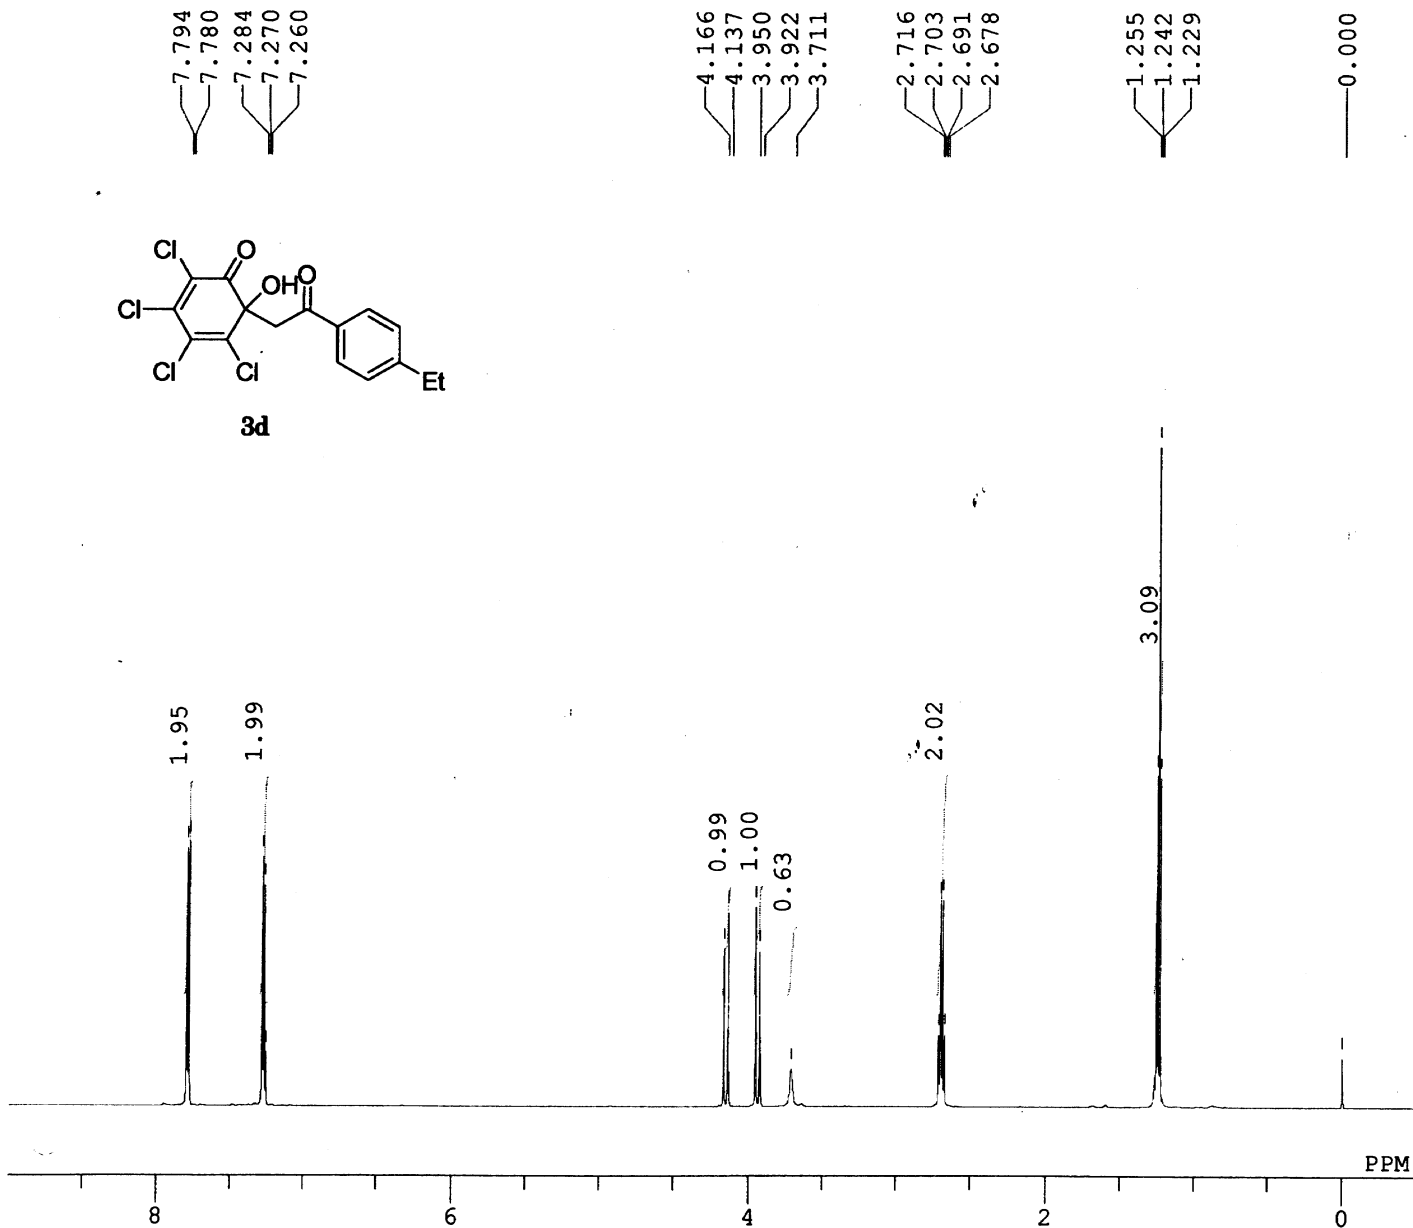

DFILE C:\DOCUME~1\nmr\LOCALS~1\Te  
COMNT lee-4c-H  
DATIM 18-02-2009 22:41:43  
OBNUC 1H  
EXMOD single\_pulse.ex2  
OBFRQ 600.17 MHz  
OBSET 5.30 KHz  
OBFIN 5.47 Hz  
POINT 32768  
FREQU 11261.26 Hz  
SCANS 8  
ACQTM 2.9098 sec  
PD 5.0000 sec  
PW1 6.90 usec  
IRNUC 1H  
CTEMP 19.5 c  
SLVNT CDCL3  
EXREF 0.00 ppm  
BF 0.12 Hz  
RGAIN 38



C:\DOCUME~1\nmr\LOCALS~1\Temp\lee-4c-C-1.jdf  
lee-4c-C

195.737  
189.571

151.501  
144.990  
138.365  
132.744  
129.728  
128.512  
128.330  
127.478

77.211  
77.000  
76.789  
76.349

51.225

28.963

15.032

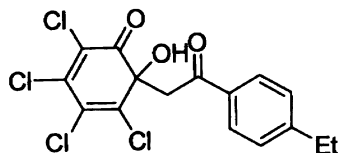

3d

DFILE C:\DOCUME~1\nmr\LOCALS~1\Te  
COMNT lee-4c-C  
DATIM 18-02-2009 23:31:17  
OBNUC 13C  
EXMOD single\_pulse\_dec  
OBFRQ 150.92 MHz  
OBSET 8.52 KHz  
OBFIN 1.74 Hz  
POINT 32768  
FREQU 47348.49 Hz  
SCANS 1000  
ACQTM 0.6921 sec  
PD 2.0000 sec  
PW1 4.17 usec  
IRNUC 1H  
CTEMP 19.8 c  
SLVNT CDCL3  
EXREF 77.00 ppm  
BF 1.20 Hz  
RGAIN 60

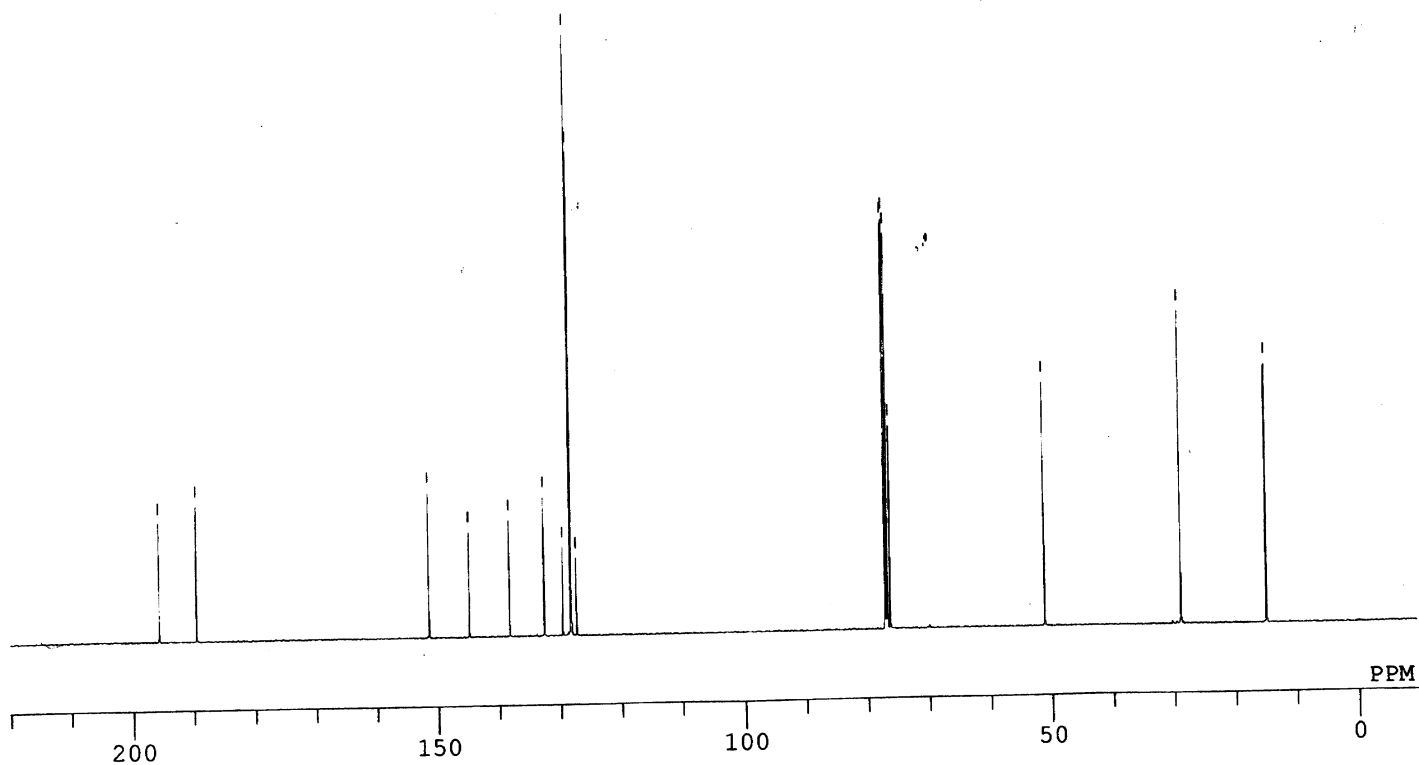

7.769  
7.747  
7.401  
7.383  
7.379

4.088  
4.045  
3.906  
3.863  
3.684

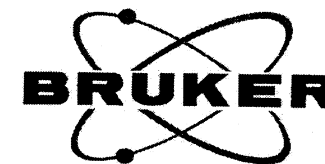

NAME guozw-lihj-785+-20081211  
EXPNO 1  
PROCNO 1  
Date\_ 20081211  
Time 13.49  
INSTRUM spect  
PROBHD 5 mm PABBO BB-  
PULPROG zg30  
TD 65536  
SOLVENT CDC13  
NS 8  
DS 2  
SWH 8223.685 Hz  
FIDRES 0.125483 Hz  
AQ 3.9846387 sec  
RG 101  
DW 60.800 usec  
DE 6.50 usec  
TE 291.4 K  
D1 1.00000000 sec  
TDO 1

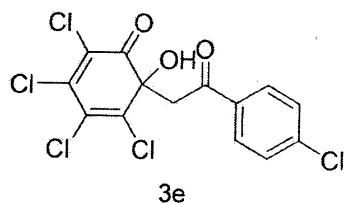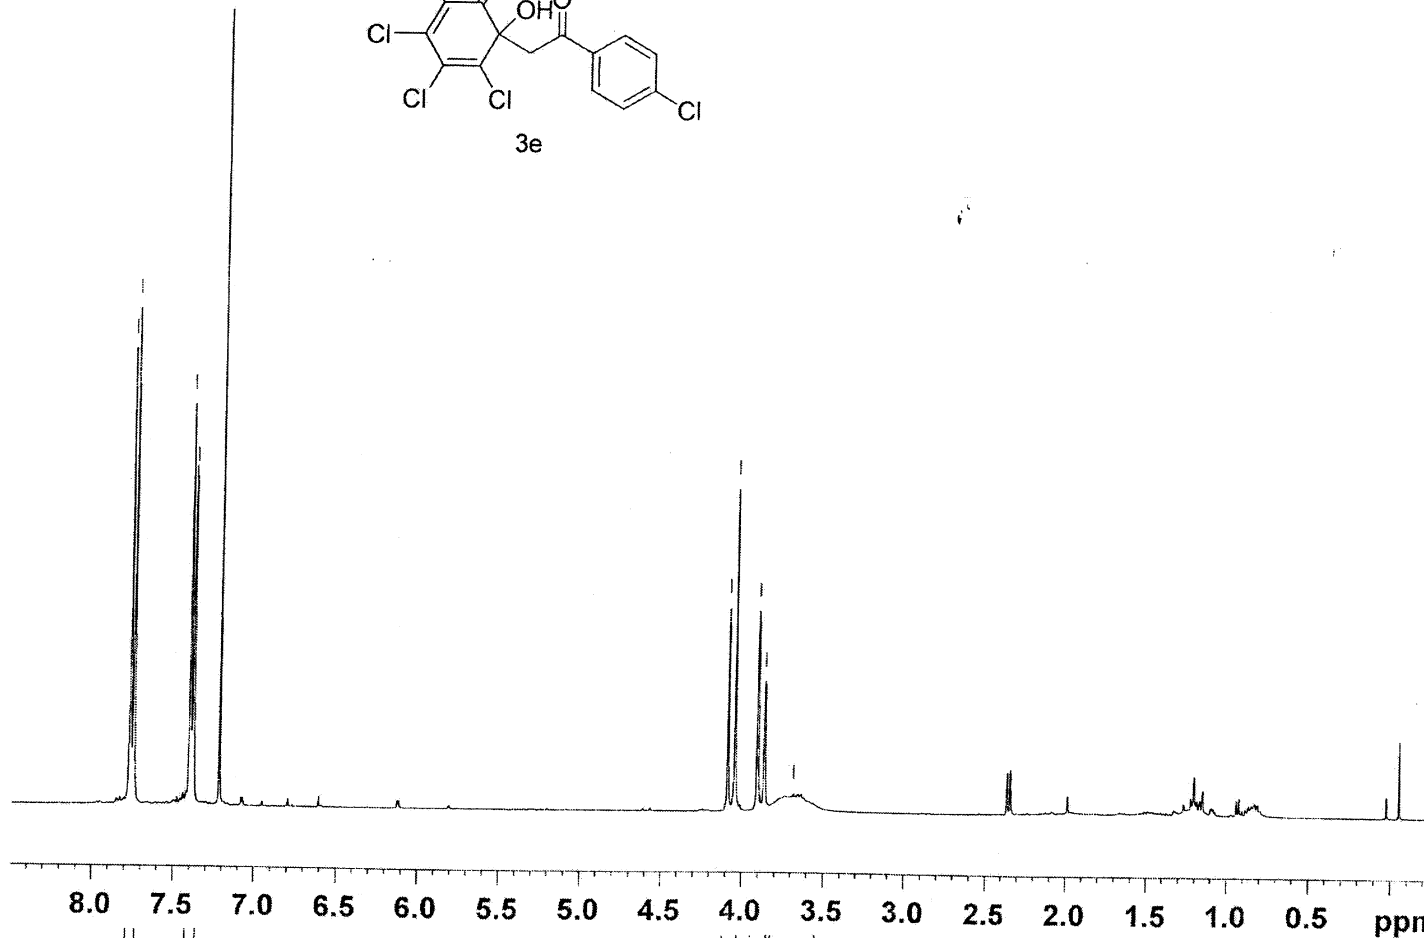

1.92  
1.92

1.00  
1.01  
0.84

==== CHANNEL f1 =====  
NUC1 1H  
P1 12.30 usec  
PL1 -1.00 dB  
PL1W 17.01305389 W  
SFO1 400.1324710 MHz  
SI 32768  
SF 400.1300259 MHz  
WDW EM  
SSB 0  
LB 0.30 Hz  
GB 0  
PC 1.00

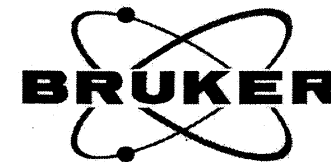

NAME lihr-lihj785-20081218-C  
EXPNO 1  
PROCNO 1  
Date\_ 20081218  
Time\_ 11.20  
INSTRUM spect  
PROBHD 5 mm PABBO BB-  
PULPROG zgpg30  
TD 65536  
SOLVENT CDC13  
NS 103  
DS 4  
SWH 24038.461 Hz  
FIDRES 0.366798 Hz  
AQ 1.3631988 sec  
RG 101  
DW 20.800 usec  
DE 6.50 usec  
TE 291.7 K  
D1 2.0000000 sec  
D11 0.0300000 sec  
TD0 1

===== CHANNEL f1 =====  
NUC1 13C  
P1 12.80 usec  
PL1 2.00 dB  
PL1W 55.31277084 W  
SFO1 100.6228298 MHz

===== CHANNEL f2 =====  
CPDPRG2 waltz16  
NUC2 1H  
PCPD2 80.00 usec  
PL2 -1.00 dB  
PL12 15.50 dB  
PL13 120.00 dB  
PL2W 17.01305389 W  
PL12W 0.38087484 W  
PL13W 0.00000000 W  
SFO2 400.1316005 MHz  
SI 32768  
SF 100.6127757 MHz  
WDW EM  
SSB 0  
LB 1.00 Hz  
GB 0  
PC 1.40

27

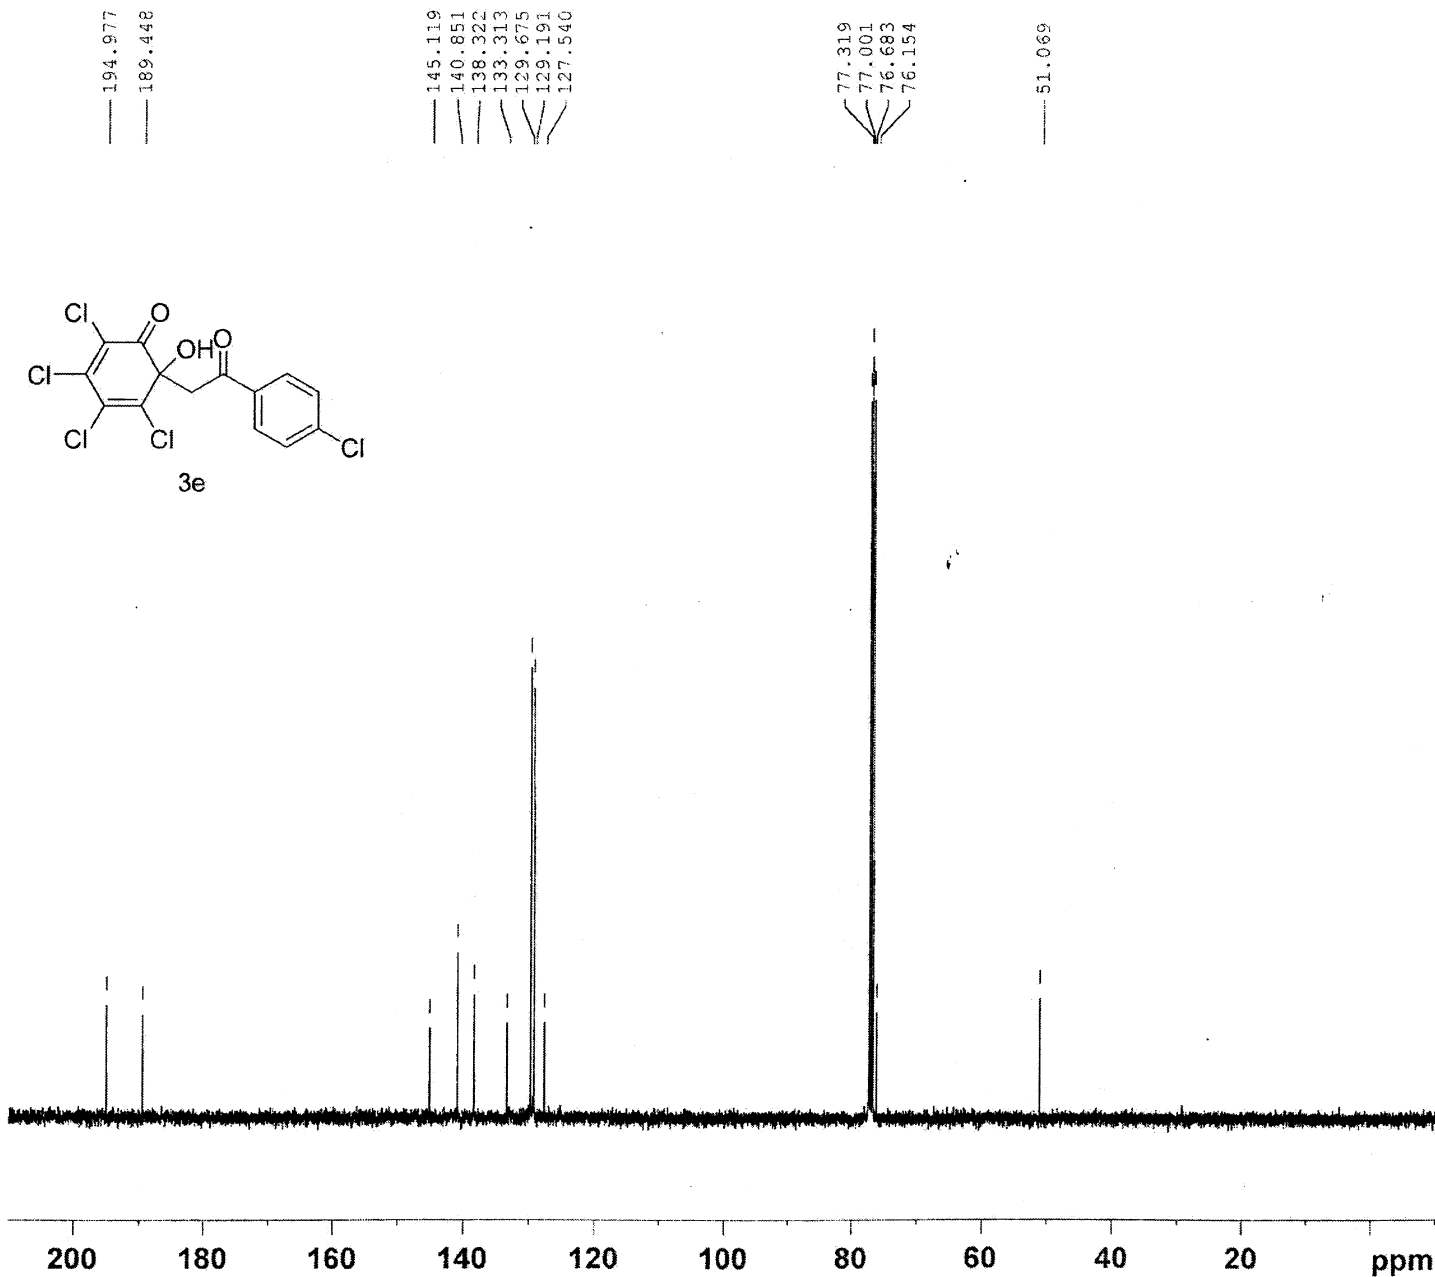

7.739  
7.717  
7.626  
7.604  
7.266

4.120  
4.078  
3.931  
3.889  
3.501

0.000

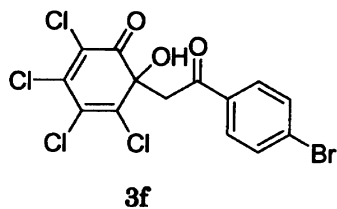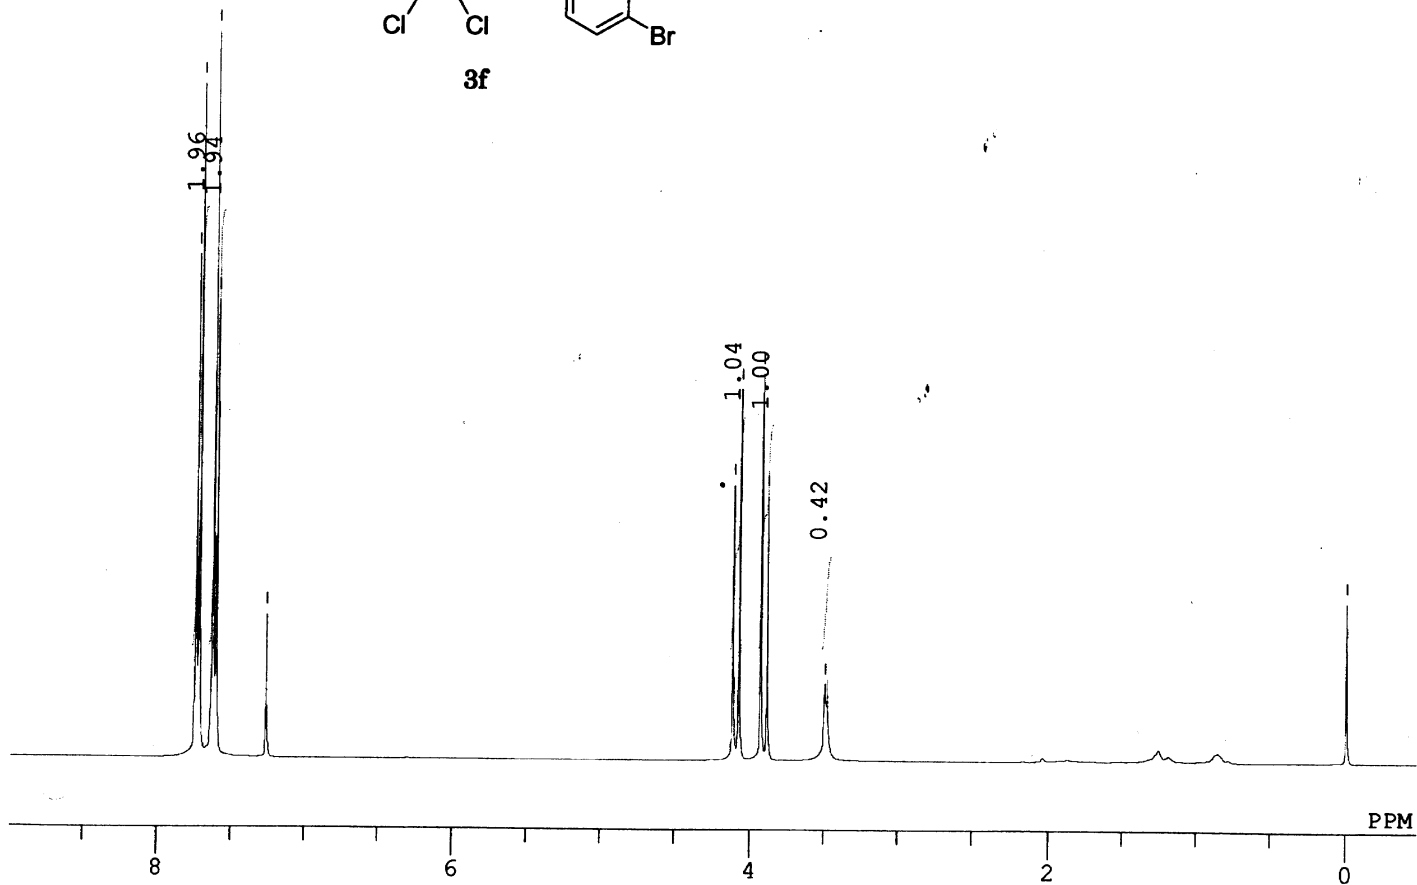

DFILE C:\DOCUME~1\nmr\LOCALS~1\Te  
COMNT lee-4e-H  
DATIM 18-02-2009 22:31:39  
OBNUC 1H  
EXMOD single\_pulse.ex2  
OBFRQ 399.78 MHz  
OBSET 4.19 KHz  
OBFIN 7.29 Hz  
POINT 16384  
FREQU 7503.00 Hz  
SCANS 8  
ACQTM 2.1837 sec  
PD 5.0000 sec  
PW1 5.50 usec  
IRNUC 1H  
CTEMP 18.8 c  
SLVNT CDCL3  
EXREF 0.00 ppm  
BF 0.12 Hz  
RGAIN 40

195.057  
189.489

145.249  
138.002  
133.693  
132.224  
129.755  
129.698  
129.650  
127.714

77.315  
77.000  
76.676  
76.218

51.075

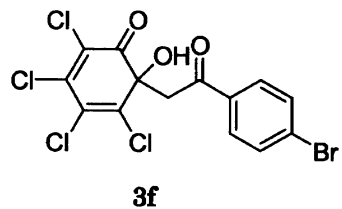

DFILE C:\DOCUME~1\nmr\LOCALS~1\Te  
COMNT lee-4e-C  
DATIM 18-02-2009 23:28:48  
OBNUC 13C  
EXMOD single\_pulse\_dec  
OBFRQ 100.53 MHz  
OBSET 5.35 KHz  
OBFIN 5.86 Hz  
POINT 32768  
FREQU 31407.03 Hz  
SCANS 721  
ACQTM 1.0433 sec  
PD 2.0000 sec  
PW1 3.00 usec  
IRNUC 1H  
CTEMP 19.2 c  
SLVNT CDCL3  
EXREF 77.00 ppm  
BF 1.20 Hz  
RGAIN 56

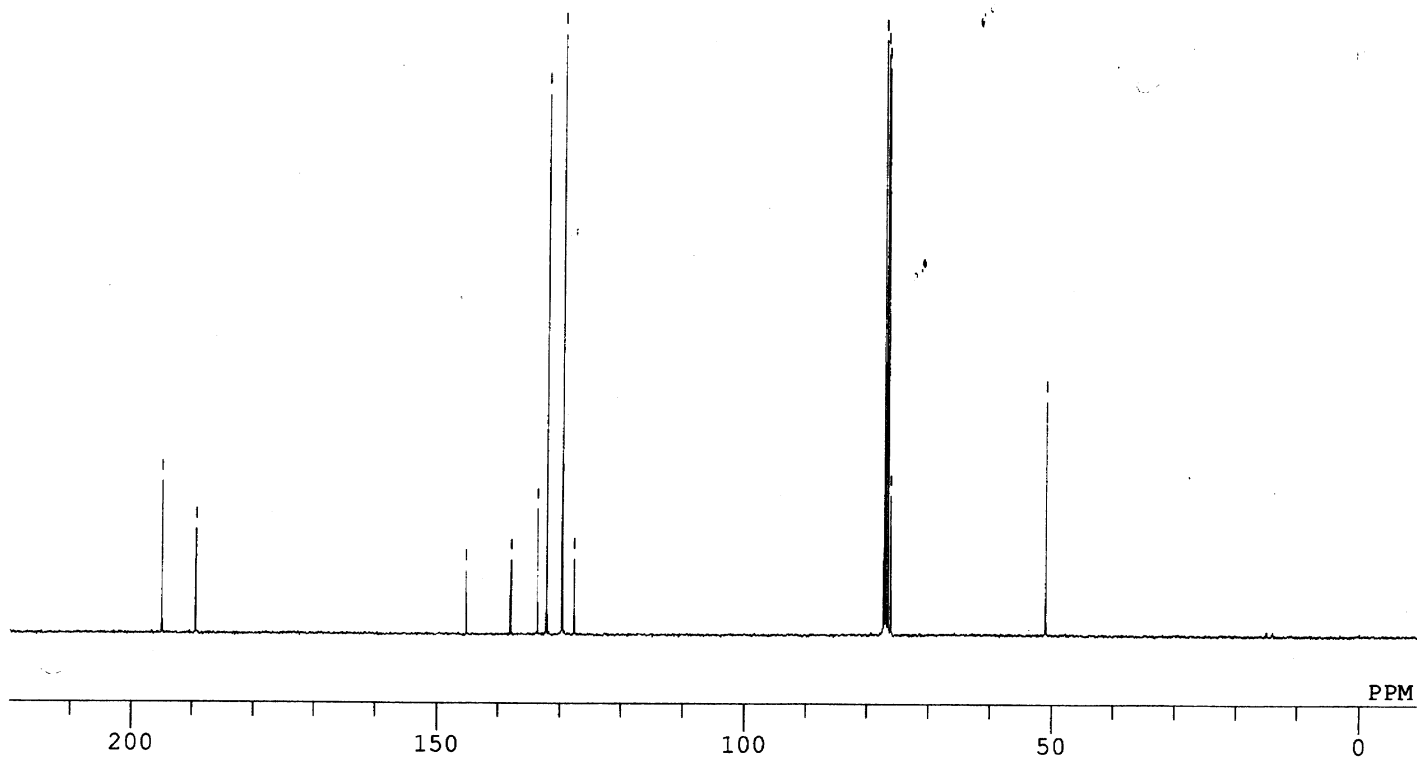

7.789  
7.711  
7.692  
7.524  
7.505  
7.380  
7.361  
7.341  
7.218

4.098  
4.055  
3.937  
3.893

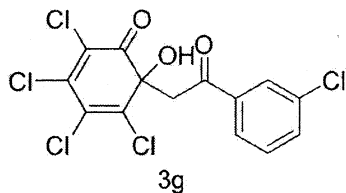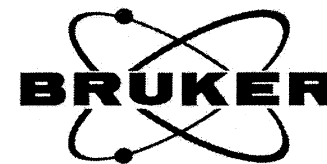

NAME guoxw-lihj-792-20081216  
EXPNO 1  
PROCNO 1  
Date\_ 20081216  
Time\_ 10.16  
INSTRUM spect  
PROBHD 5 mm PABBO BB-  
PULPROG zg30  
TD 65536  
SOLVENT CDCl3  
NS 8  
DS 2  
SWH 8223.685 Hz  
FIDRES 0.125483 Hz  
AQ 3.9846387 sec  
RG 71.8  
DW 60.800 usec  
DE 6.50 usec  
TE 292.8 K  
D1 1.00000000 sec  
TDO 1

===== CHANNEL f1 =====  
NUC1 1H  
P1 12.30 usec  
PL1 -1.00 dB  
PL1W 17.01305389 W  
SFO1 400.1324710 MHz  
SI 32768  
SF 400.1300259 MHz  
WDW EM  
SSB 0  
LB 0.30 Hz  
GB 0  
PC 1.00

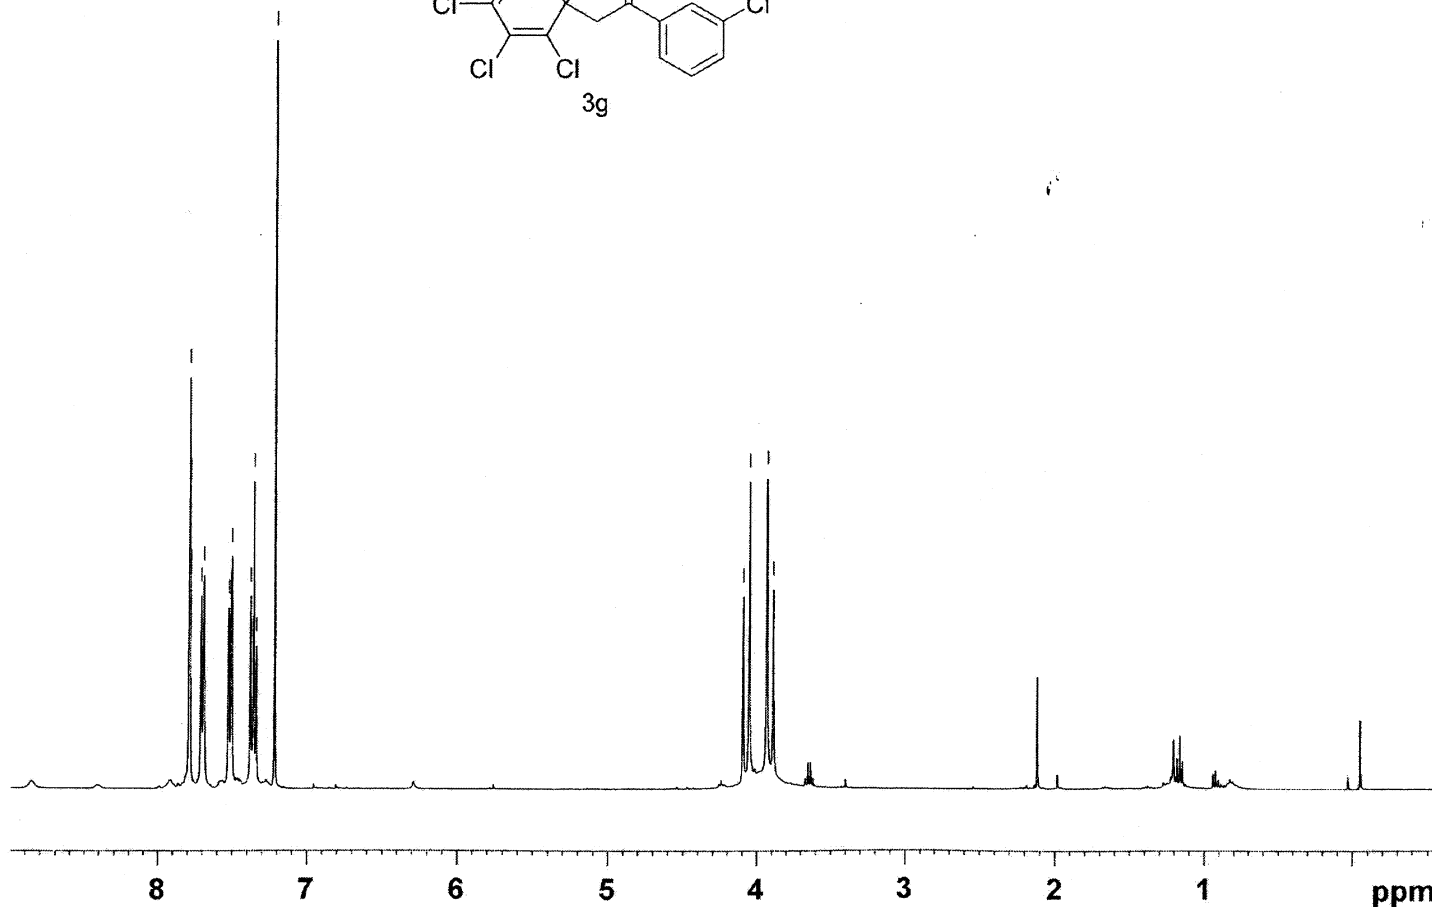

1.00  
0.97  
1.01  
1.03

1.06  
1.16

— 194.988  
— 189.439

145.222  
138.238  
136.435  
135.197  
134.107  
130.167  
129.666  
128.285  
127.506  
126.378

77.317  
76.999  
76.881  
76.099

— 51.145

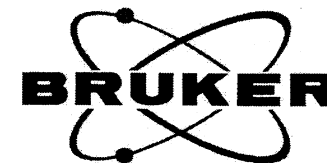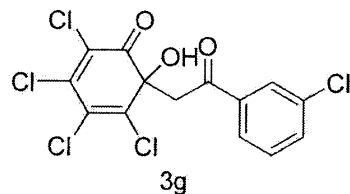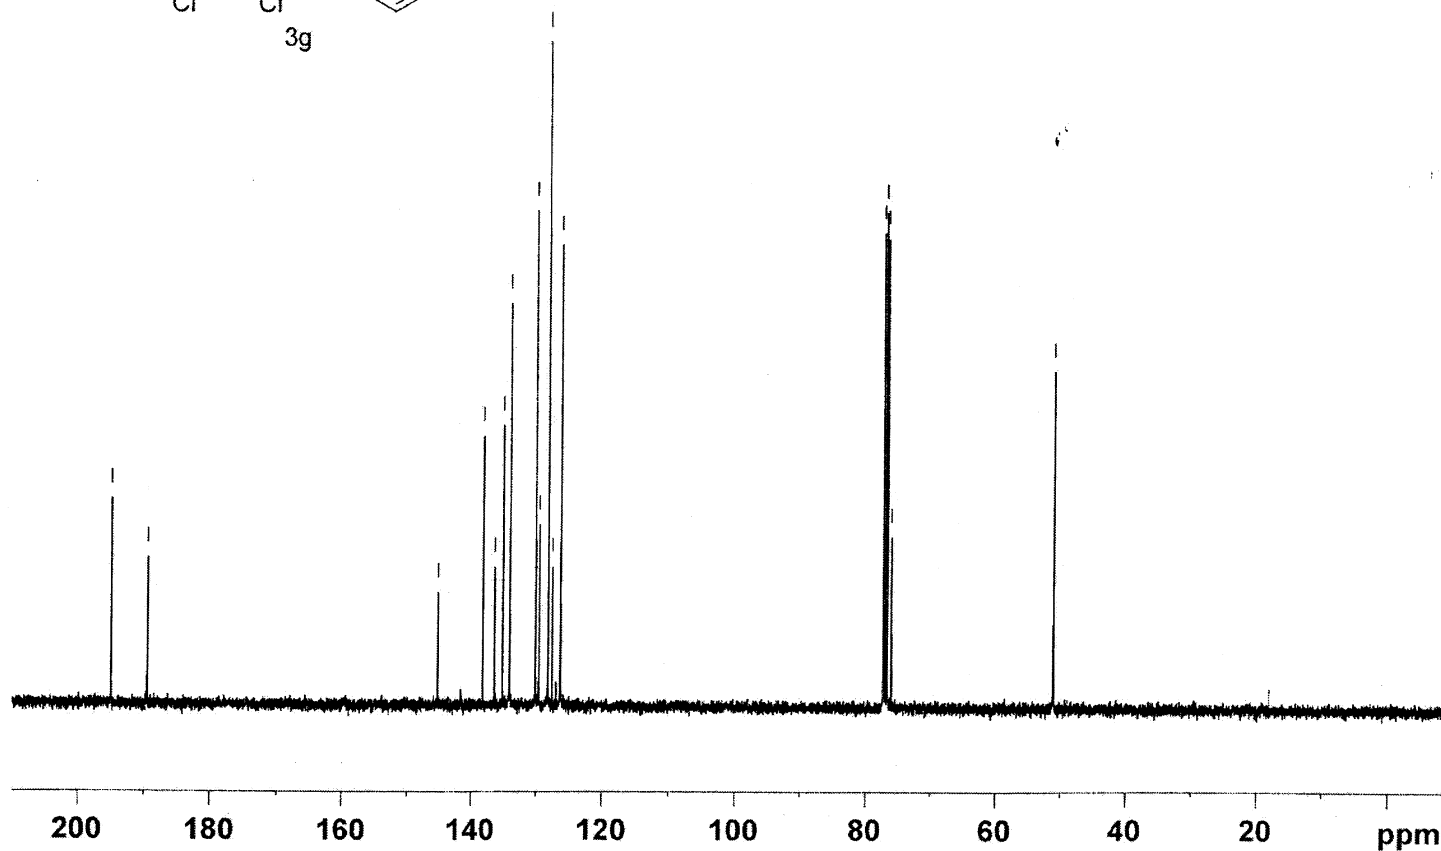

NAME guoxw-lihj-792-20081216  
EXPNO 2  
PROCNO 1  
Date\_ 20081216  
Time 10.15  
INSTRUM spect  
PROBHD 5 mm PABBO BB-  
PULPROG zgpg30  
TD 65536  
SOLVENT CDC13  
NS 160  
DS 4  
SWH 24038.461 Hz  
FIDRES 0.366798 Hz  
AQ 1.3631988 sec  
RG 80.6  
DW 20.800 usec  
DE 6.50 usec  
TE 293.3 K  
D1 2.0000000 sec  
D11 0.0300000 sec  
TD0 1

==== CHANNEL f1 =====  
NUC1 13C  
P1 12.80 usec  
PL1 2.00 dB  
PL1W 55.31277084 W  
SFO1 100.6228298 MHz

==== CHANNEL f2 =====  
CPDPRG2 waltz16  
NUC2 1H  
PCPD2 80.00 usec  
PL2 -1.00 dB  
PL12 15.50 dB  
PL13 15.50 dB  
PL2W 17.01305389 W  
PL12W 0.38087484 W  
PL13W 0.38087484 W  
SFO2 400.1316005 MHz  
SI 32768  
SF 100.6127774 MHz  
WDW EM  
SSB 0  
LB 1.00 Hz  
GB 0  
PC 1.40

8.500  
8.479  
7.958  
7.938  
7.893  
7.875  
7.802  
7.782  
7.544  
7.527  
7.507  
7.490  
7.471  
7.453  
7.437  
7.418  
7.399

4.202  
4.159  
4.116  
4.073

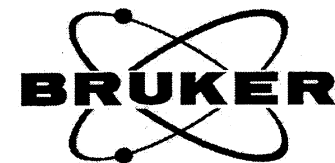

NAME guoxw-liwj-40-20081215  
EXPNO 1  
PROCNO 1  
Date 20081215  
Time 16.50  
INSTRUM spect  
PROBHD 5 mm PABBO BB-  
PULPROG zg30  
TD 65536  
SOLVENT CDCl3  
NS 8  
DS 2  
SWH 8223.685 Hz  
FIDRES 0.125483 Hz  
AQ 3.9846387 sec  
RG 71.8  
DW 60.800 usec  
DE 6.50 usec  
TE 292.3 K  
D1 1.00000000 sec  
TD0 1

===== CHANNEL f1 =====  
NUC1 1H  
P1 12.30 usec  
PL1 -1.00 dB  
PL1W 17.01305389 W  
SFO1 400.1324710 MHz  
SI 32768  
SF 400.1300259 MHz  
WDW EM  
SSB 0  
LB 0.30 Hz  
GB 0  
PC 1.00

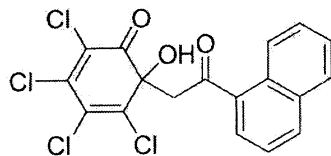

3h

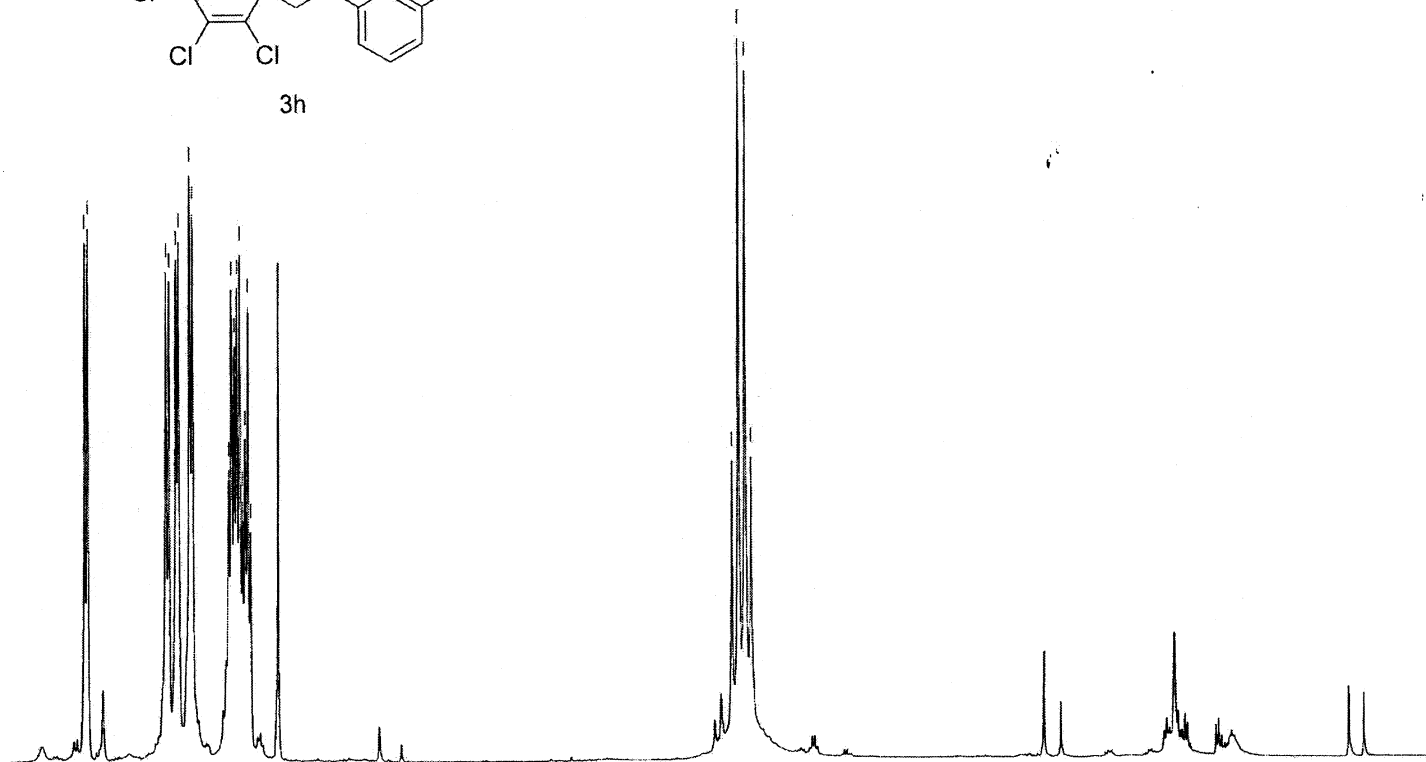

8.5 8.0 7.5 7.0 6.5 6.0 5.5 5.0 4.5 4.0 3.5 3.0 2.5 2.0 1.5 1.0 0.5 ppm

0.81  
0.88  
0.94  
1.16  
1.86

1.00  
1.14



199.418

189.659

145.029  
 138.533  
 134.321  
 133.878  
 132.863  
 129.957  
 129.793  
 129.397  
 128.643  
 128.508  
 127.501  
 126.764  
 125.516  
 124.249

77.315  
 77.200  
 76.998  
 76.680

53.900

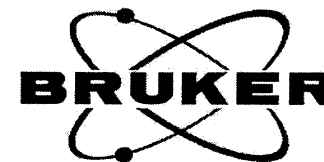

NAME guoxw-lihj-8-20081223  
 EXPNO 2  
 PROCNO 1  
 Date\_ 20081223  
 Time\_ 16.34  
 INSTRUM spect  
 PROBHD 5 mm PABBO BB-  
 PULPROG zgpg30  
 TD 65536  
 SOLVENT CDC13  
 NS 204  
 DS 4  
 SWH 24038.461 Hz  
 FIDRES 0.366798 Hz  
 AQ 1.3631988 sec  
 RG 80.6  
 DW 20.800 usec  
 DE 6.50 usec  
 TE 292.3 K  
 D1 2.0000000 sec  
 D11 0.03000000 sec  
 TD0 1

===== CHANNEL f1 =====  
 NUC1 13C  
 P1 12.80 usec  
 PL1 2.00 dB  
 PL1W 55.31277084 W  
 SFO1 100.6228298 MHz

===== CHANNEL f2 =====  
 CPDPRG2 waltz16  
 NUC2 1H  
 PCPD2 80.00 usec  
 PL2 -1.00 dB  
 PL12 15.50 dB  
 PL13 15.50 dB  
 PL2W 17.01305389 W  
 PL12W 0.38087484 W  
 PL13W 0.38087484 W  
 SFO2 400.1316005 MHz  
 SI 32768  
 SF 100.6127751 MHz  
 WDW EM  
 SSB 0  
 LB 1.00 Hz  
 GB 0  
 PC 1.40

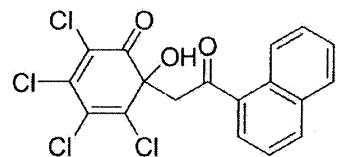

3h

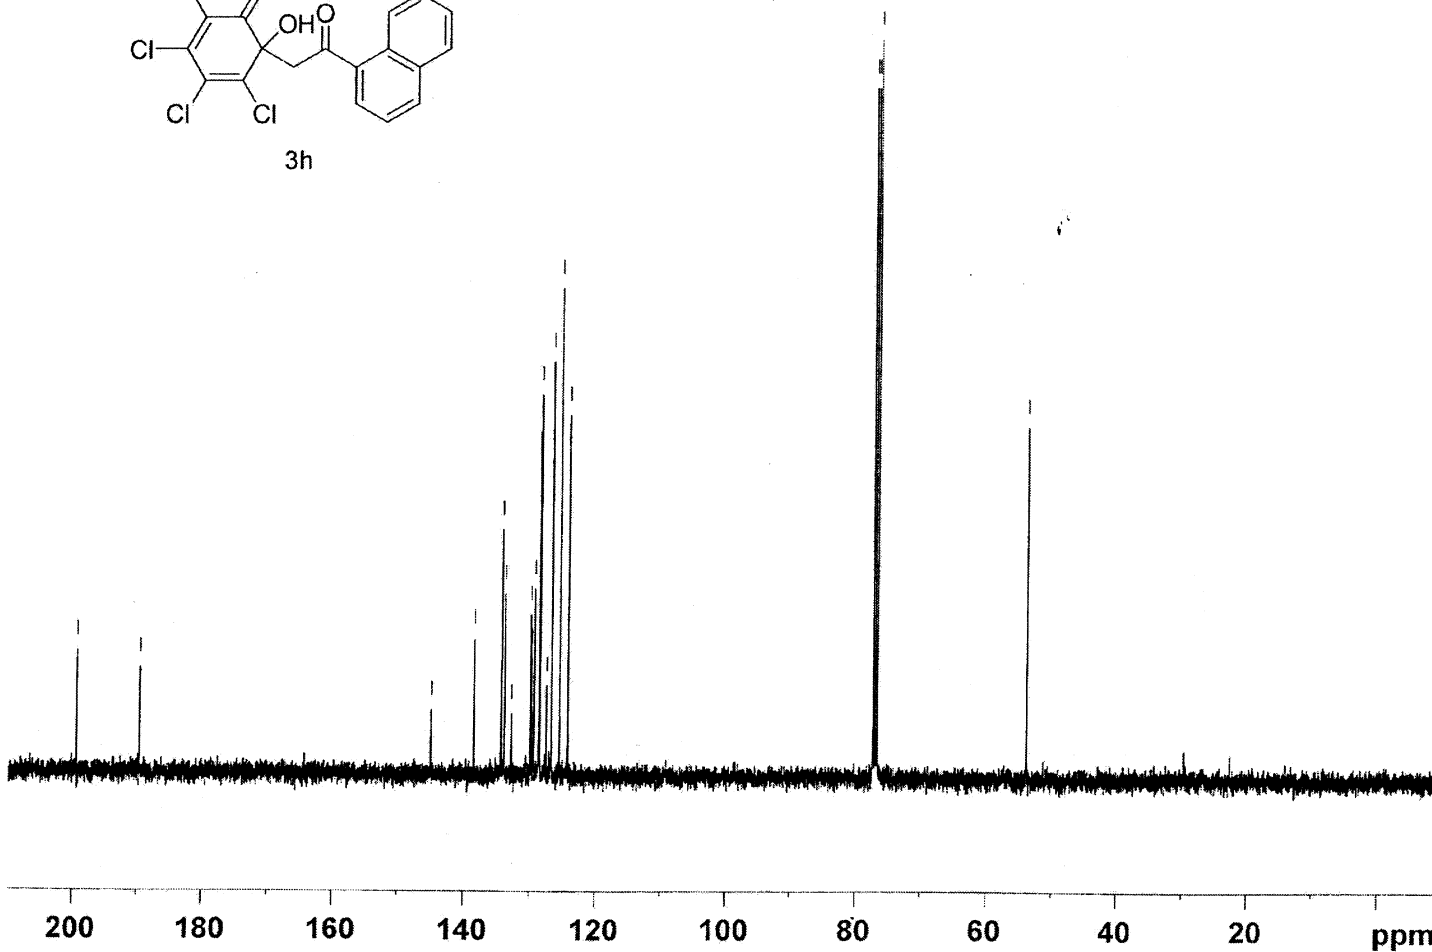

8.435  
7.965  
7.945  
7.874  
7.854  
7.653  
7.636  
7.615  
7.590  
7.572  
7.553

4.373  
4.330  
4.166  
4.123  
3.676

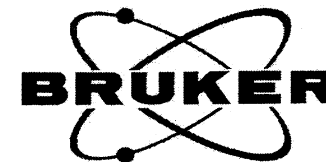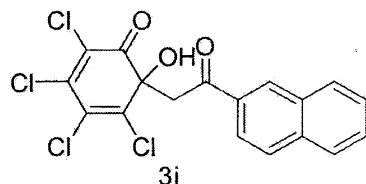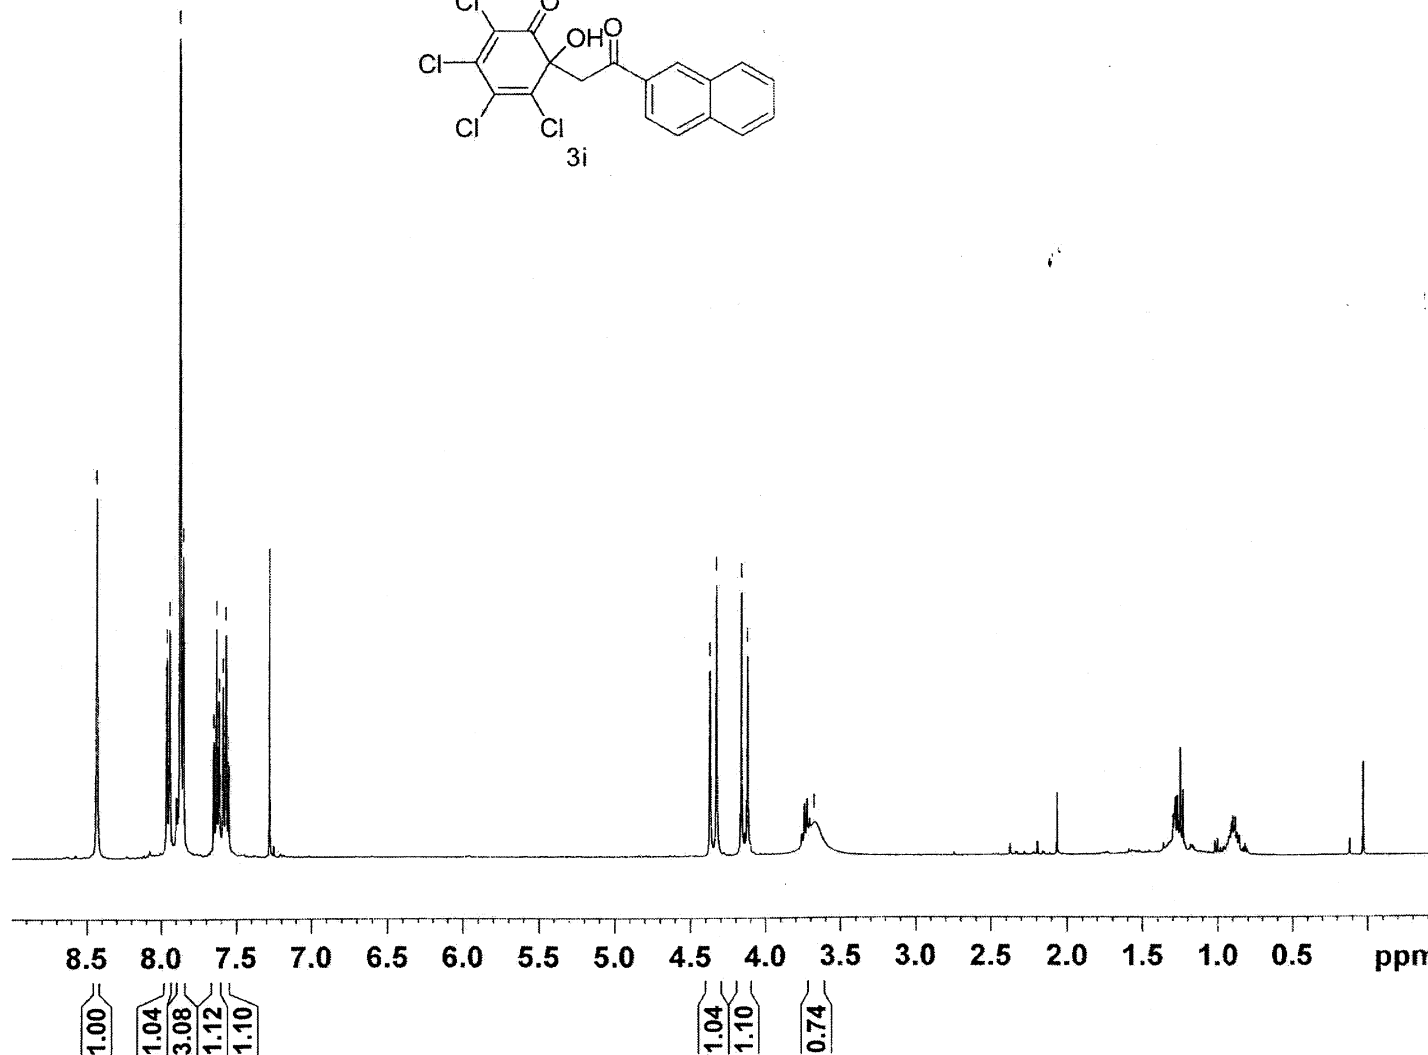

NAME lihr-lihj791-H  
EXPNO 1  
PROCNO 1  
Date\_ 20081215  
Time\_ 11.48  
INSTRUM spect  
PROBHD 5 mm PABBO BB-  
PULPROG zg30  
TD 65536  
SOLVENT CDCl3  
NS 8  
DS 2  
SWH 8223.685 Hz  
FIDRES 0.125483 Hz  
AQ 3.9846387 sec  
RG 11.3  
DW 60.800 usec  
DE 6.50 usec  
TE 291.7 K  
D1 1.00000000 sec  
TD0 1

===== CHANNEL f1 =====  
NUC1 1H  
P1 12.30 usec  
PL1 -1.00 dB  
PL1W 17.01305389 W  
SFO1 400.1324710 MHz  
SI 32768  
SF 400.1300001 MHz  
WDW EM  
SSB 0  
LB 0.30 Hz  
GB 0  
PC 1.00

196.071  
189.653

145.104  
138.445  
135.909  
132.235  
132.204  
130.641  
129.755  
129.675  
129.115  
128.743  
127.765  
127.540  
127.072  
123.181

77.317  
76.999  
76.682  
76.346

51.393

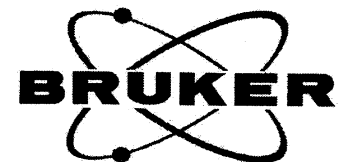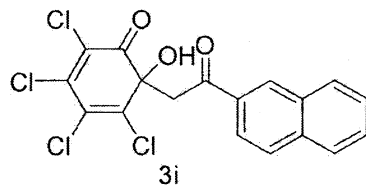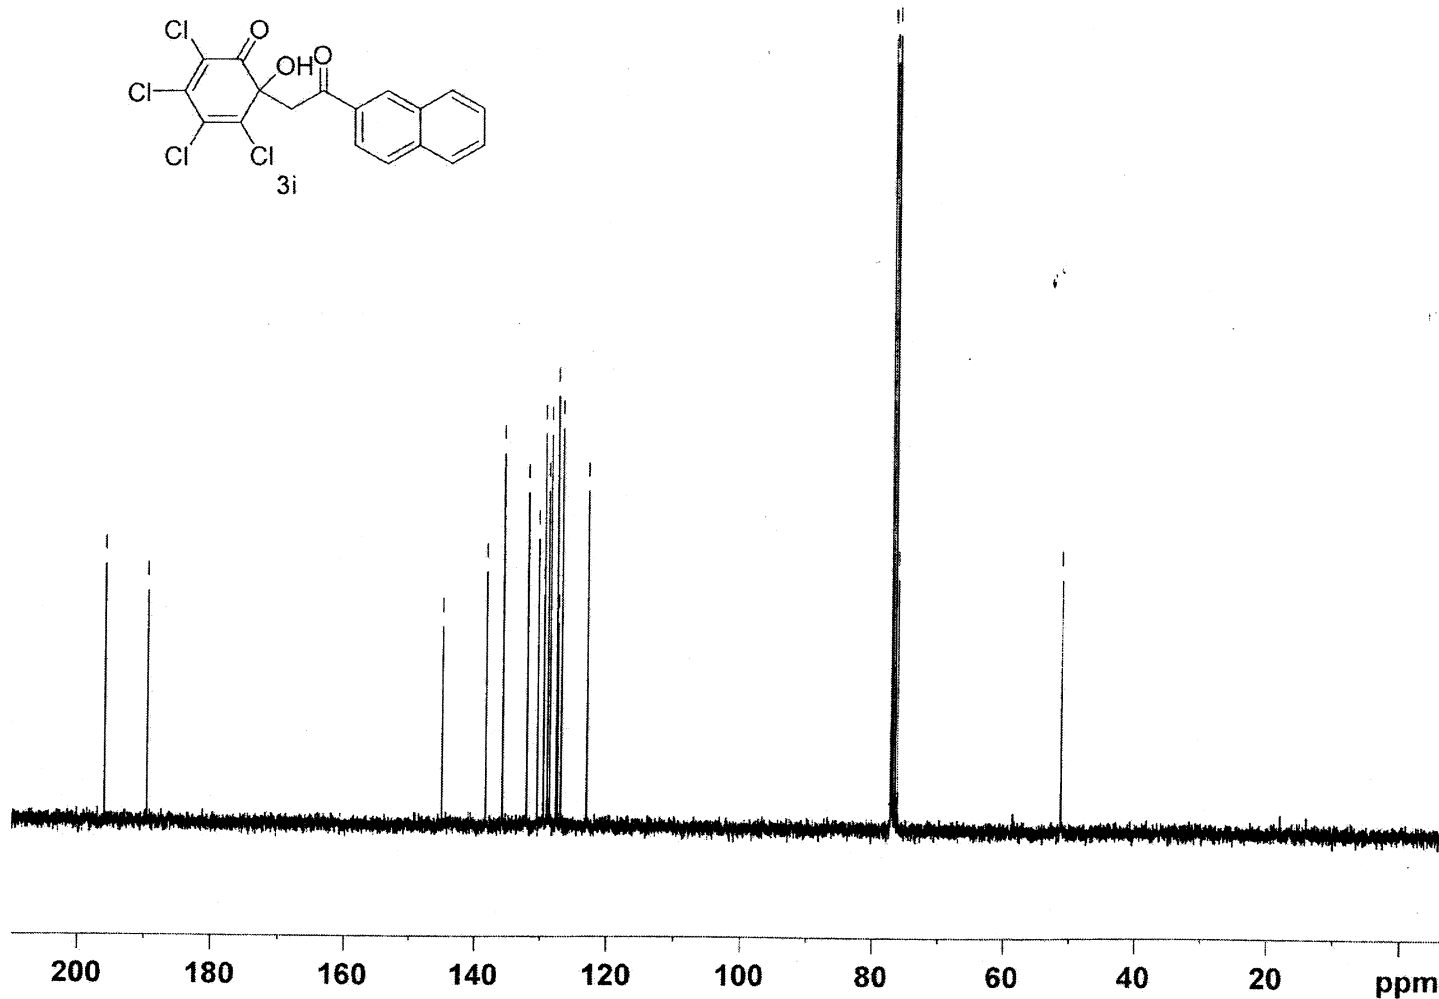

NAME lih-lij791-C  
EXPNO 1  
PROCNO 1  
Date\_ 20081215  
Time 11.41  
INSTRUM spect  
PROBHD 5 mm PABBO BB-  
PULPROG zgpg30  
TD 65536  
SOLVENT CDCl3  
NS 114  
DS 4  
SWH 24038.461 Hz  
FIDRES 0.366798 Hz  
AQ 1.3631988 sec  
RG 144  
DW 20.800 usec  
DE 6.50 usec  
TE 291.6 K  
D1 2.0000000 sec  
D11 0.0300000 sec  
TD0 1

==== CHANNEL f1 =====  
NUC1 13C  
P1 12.80 usec  
PL1 2.00 dB  
PL1W 55.31277084 W  
SFO1 100.6228298 MHz

==== CHANNEL f2 =====  
CPDPRG2 waltz16  
NUC2 1H  
PCPD2 80.00 usec  
PL2 -1.00 dB  
PL12 15.50 dB  
PL13 120.00 dB  
PL2W 17.01305389 W  
PL12W 0.38087484 W  
PL13W 0.0000000 W  
SFO2 400.1316005 MHz  
SI 32768  
SF 100.6127792 MHz  
WDW EM  
SSB 0  
LB 1.00 Hz  
GB 0  
PC 1.40

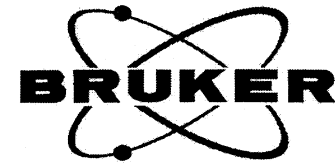

NAME guoxw-lihj-799-20081216  
EXPNO 1  
PROCNO 1  
Date\_ 20081216  
Time 10.47  
INSTRUM spect  
PROBHD 5 mm PABBO BB-  
PULPROG zg30  
TD 65536  
SOLVENT CDC13  
NS 8  
DS 2  
SWH 8223.685 Hz  
FIDRES 0.125483 Hz  
AQ 3.9846387 sec  
RG 71.8  
DW 60.800 usec  
DE 6.50 usec  
TE 293.2 K  
D1 1.00000000 sec  
TDO 1

===== CHANNEL f1 =====  
NUC1 1H  
P1 12.30 usec  
PL1 -1.00 dB  
PL1W 17.01305389 W  
SFO1 400.1324710 MHz  
SI 32768  
SF 400.1300259 MHz  
WDW EM  
SSB 0  
LB 0.30 Hz  
GB 0  
PC 1.00

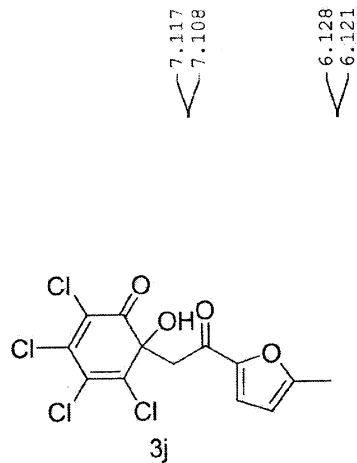

7.117  
7.108

6.128  
6.121

4.350

3.846  
3.805  
3.654  
3.612

2.318

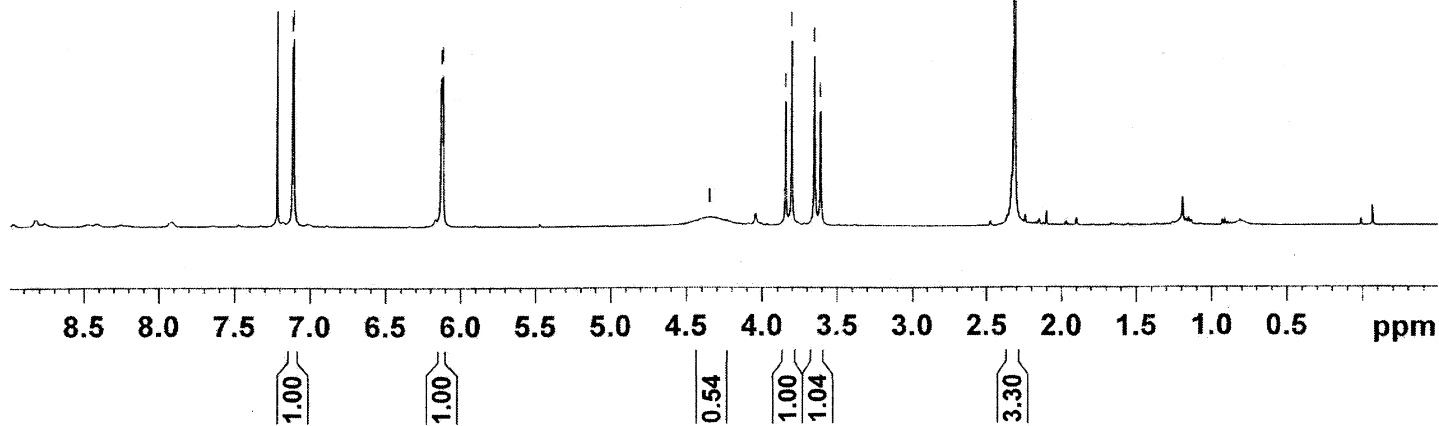

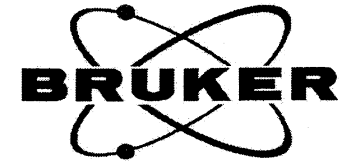

NAME guoxw-lihj-799-20081216  
EXPNO 2  
PROCNO 1  
Date\_ 20081216  
Time\_ 10.42  
INSTRUM spect  
PROBHD 5 mm PABBO BB-  
PULPROG zgpg30  
TD 65536  
SOLVENT CDCl3  
NS 160  
DS 4  
SWH 24038.461 Hz  
FIDRES 0.366798 Hz  
AQ 1.3631988 sec  
RG 80.6  
DW 20.800 usec  
DE 6.50 usec  
TE 293.5 K  
D1 2.00000000 sec  
D11 0.03000000 sec  
TDO 1

==== CHANNEL f1 =====  
NUC1 13C  
P1 12.80 usec  
PL1 2.00 dB  
PL1W 55.31277084 W  
SFO1 100.6228298 MHz

==== CHANNEL f2 =====  
CPDPRG2 waltz16  
NUC2 1H  
PCPD2 80.00 usec  
PL2 -1.00 dB  
PL12 15.50 dB  
PL13 15.50 dB  
PL2W 17.01305389 W  
PL12W 0.38087484 W  
PL13W 0.38087484 W  
SFO2 400.1316005 MHz  
SI 32768  
SF 100.6127787 MHz  
WDW EM  
SSB 0  
LB 1.00 Hz  
GB 0  
PC 1.40

189.613  
183.048  
159.393  
149.891  
144.755  
138.649  
129.717  
127.032  
121.259  
109.690

77.317  
76.999  
76.681  
76.597

49.951

14.016

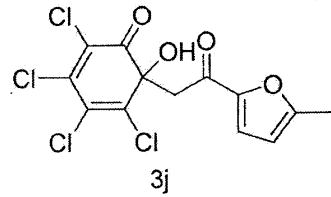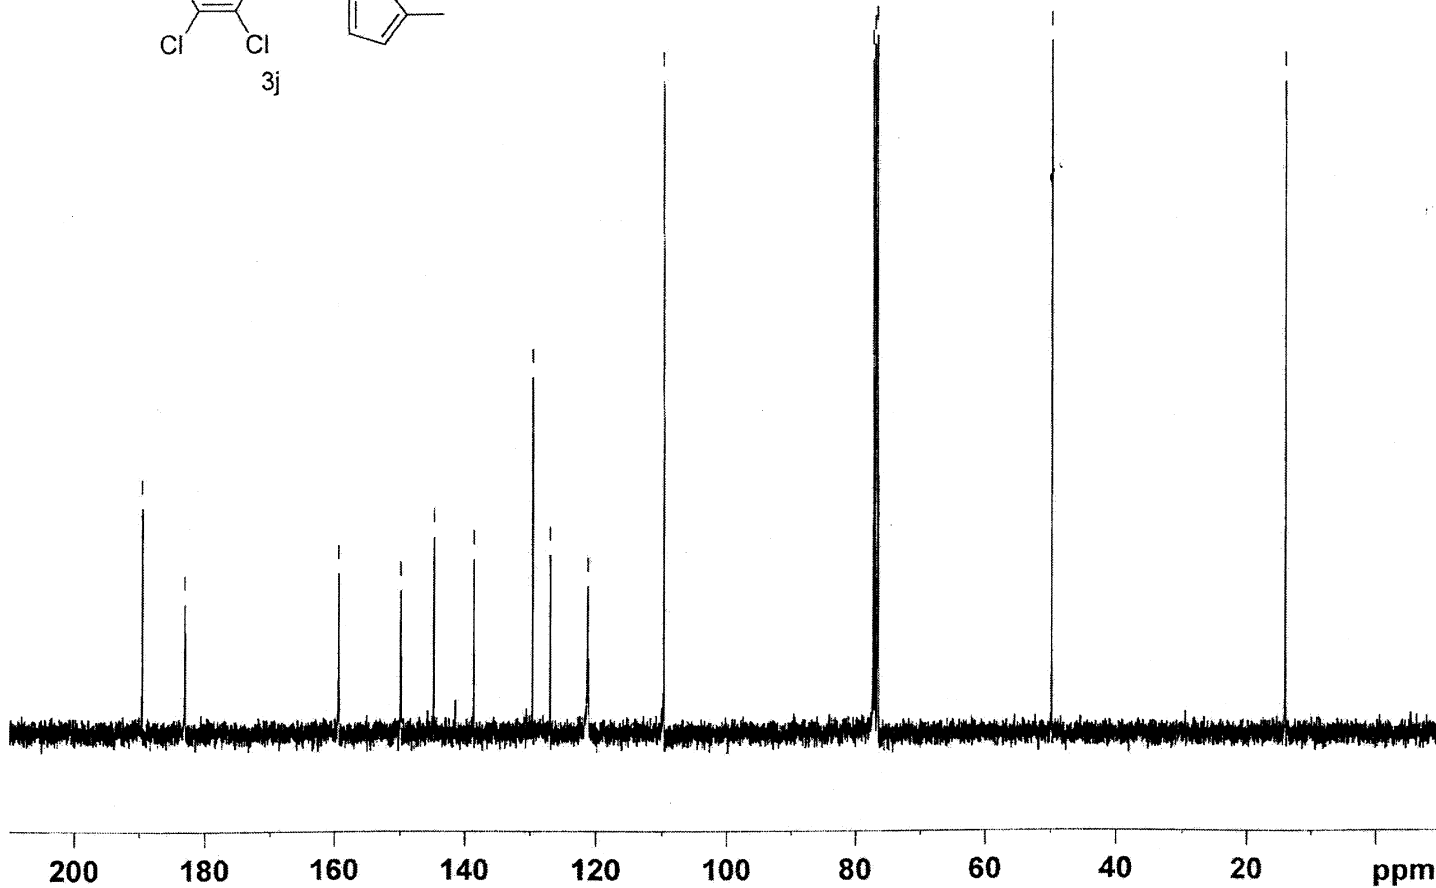

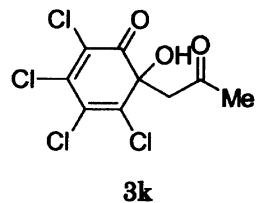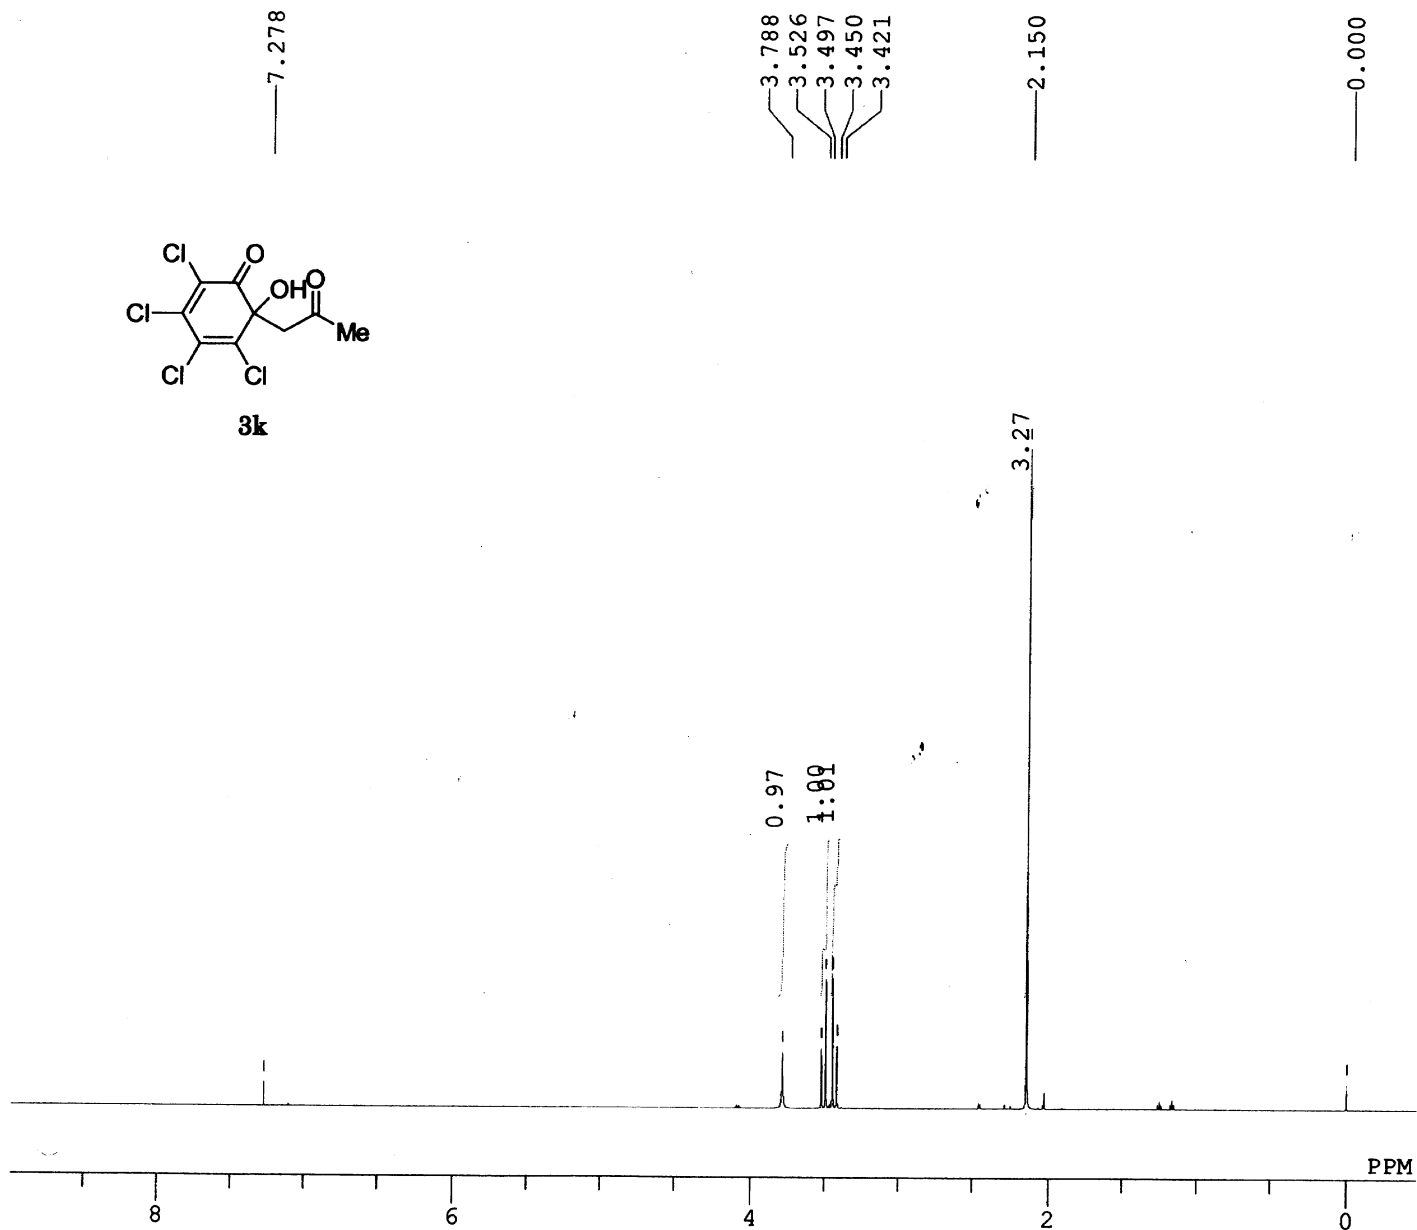

DFILE C:\DOCUME~1\nmr\LOCALS~1\Te  
COMNT lee-R876-0H  
DATIM 17-02-2009 12:35:22  
OBNUC 1H  
EXMOD single\_pulse.ex2  
OBFRQ 600.17 MHz  
OBSET 5.30 KHz  
OBFIN 5.47 Hz  
POINT 32768  
FREQU 11261.26 Hz  
SCANS 8  
ACQTM 2.9098 sec  
PD 5.0000 sec  
PW1 6.90 usec  
IRNUC 1H  
CTEMP 18.8 c  
SLVNT CDCL3  
EXREF 0.00 ppm  
BF 0.12 Hz  
RGAIN 42

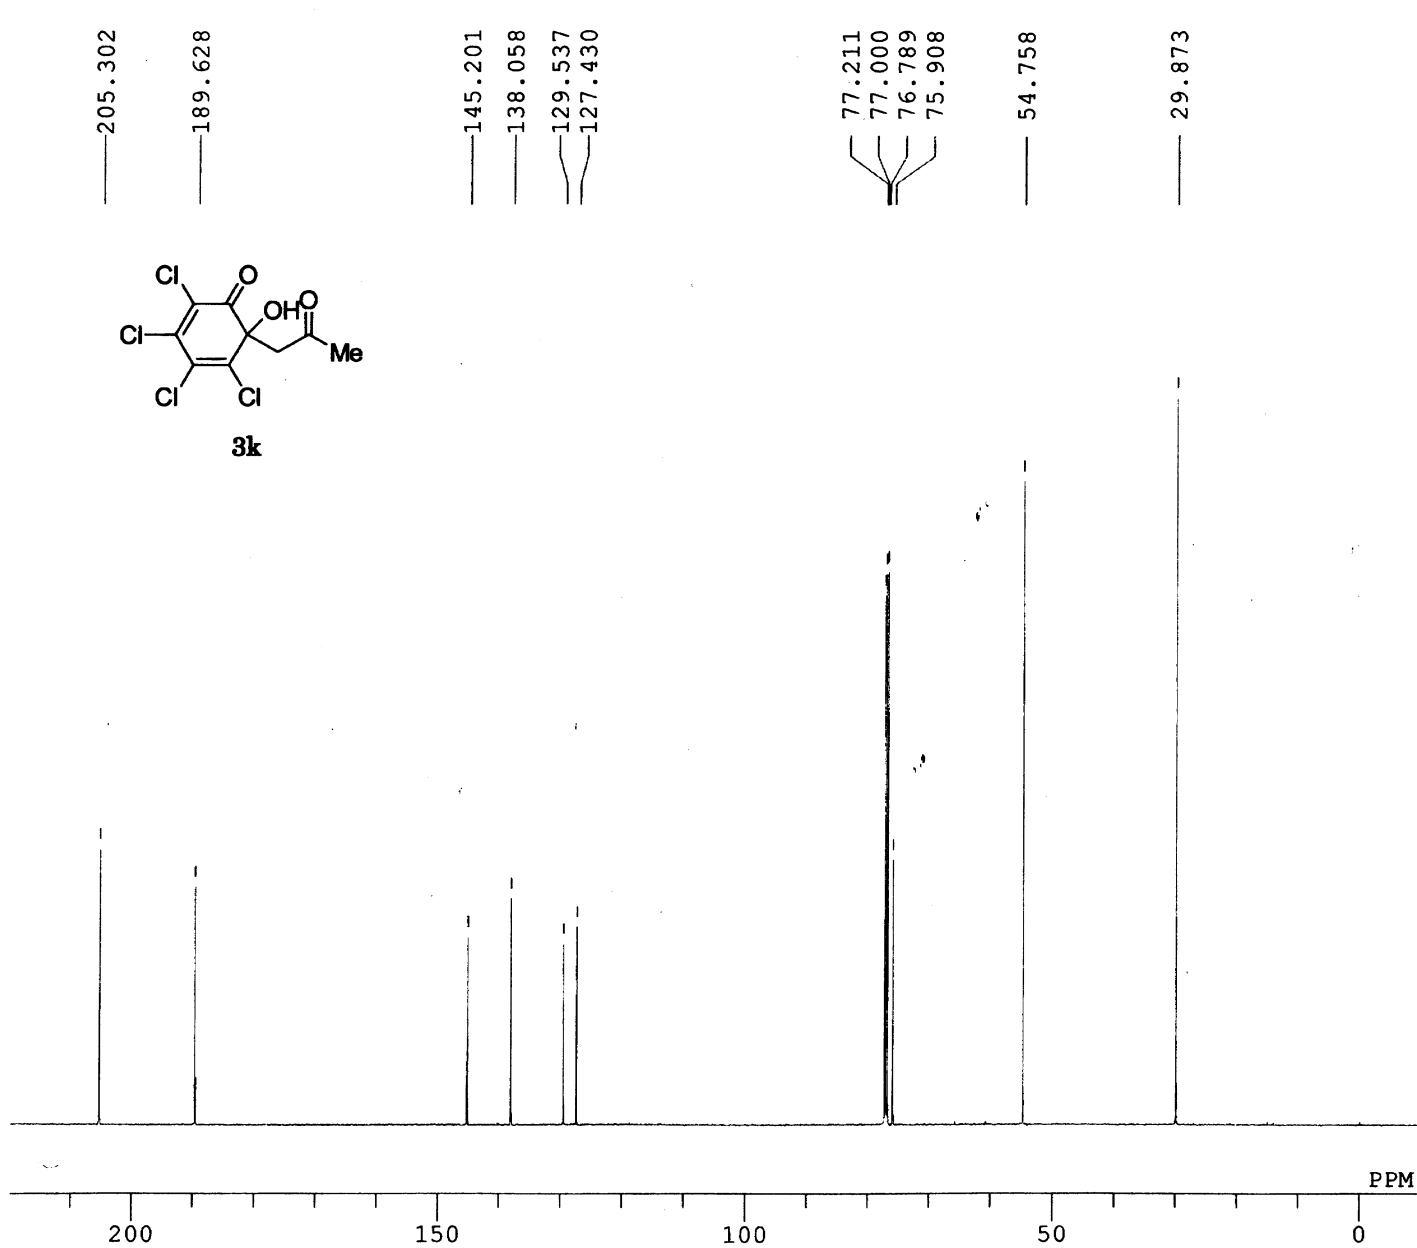

DFILE C:\DOCUME~1\nmr\LOCALS~1\Te  
COMNT lee-R876-0C  
DATIM 17-02-2009 14:06:40  
OBNUC 13C  
EXMOD single\_pulse\_dec  
OBFRQ 150.92 MHz  
OBSET 8.52 KHz  
OBFIN 1.74 Hz  
POINT 32768  
FREQU 47348.49 Hz  
SCANS 2002  
ACQTM 0.6921 sec  
PD 2.0000 sec  
PW1 4.17 usec  
IRNUC 1H  
CTEMP 20.2 c  
SLVNT CDCL3  
EXREF 77.00 ppm  
BF 1.20 Hz  
RGAIN 60

7.604  
7.602  
7.585  
7.566  
7.446  
7.442  
7.427  
7.424  
7.415  
7.409  
7.405  
7.390  
7.367  
7.360  
7.348  
7.341  
7.323  
7.311  
7.308  
7.293  
7.282  
7.224  
7.205  
6.563  
6.538  
6.318  
6.293  
6.239  
6.215

4.314

3.977

2.979  
2.944  
2.923  
2.912  
2.886  
2.874  
2.858  
2.820  
2.177  
2.101

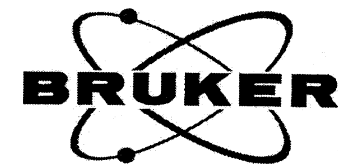

NAME guoxw-lwj-20-20081124  
EXPNO 1  
PROCNO 1  
Date 20081124  
Time 16.31  
INSTRUM spect  
PROBHD 5 mm PABBO BB-  
PULPROG zg30  
TD 65536  
SOLVENT CDC13  
NS 8  
DS 2  
SWH 8223.685 Hz  
FIDRES 0.125483 Hz  
AQ 3.9846387 sec  
RG 20.2  
DW 60.800 usec  
DE 6.50 usec  
TE 292.2 K  
D1 1.00000000 sec  
TD0 1

==== CHANNEL f1 =====  
NUC1 1H  
P1 12.30 usec  
PL1 -1.00 dB  
PL1W 17.01305389 W  
SFO1 400.1324710 MHz  
SI 32768  
SF 400.1300000 MHz  
WDW EM  
SSE 0  
LB 0.30 Hz  
GB 0  
PC 1.00

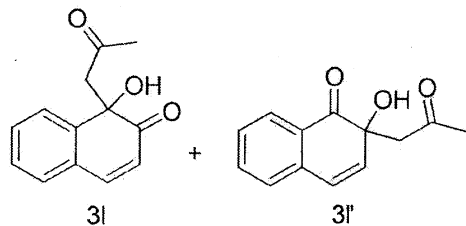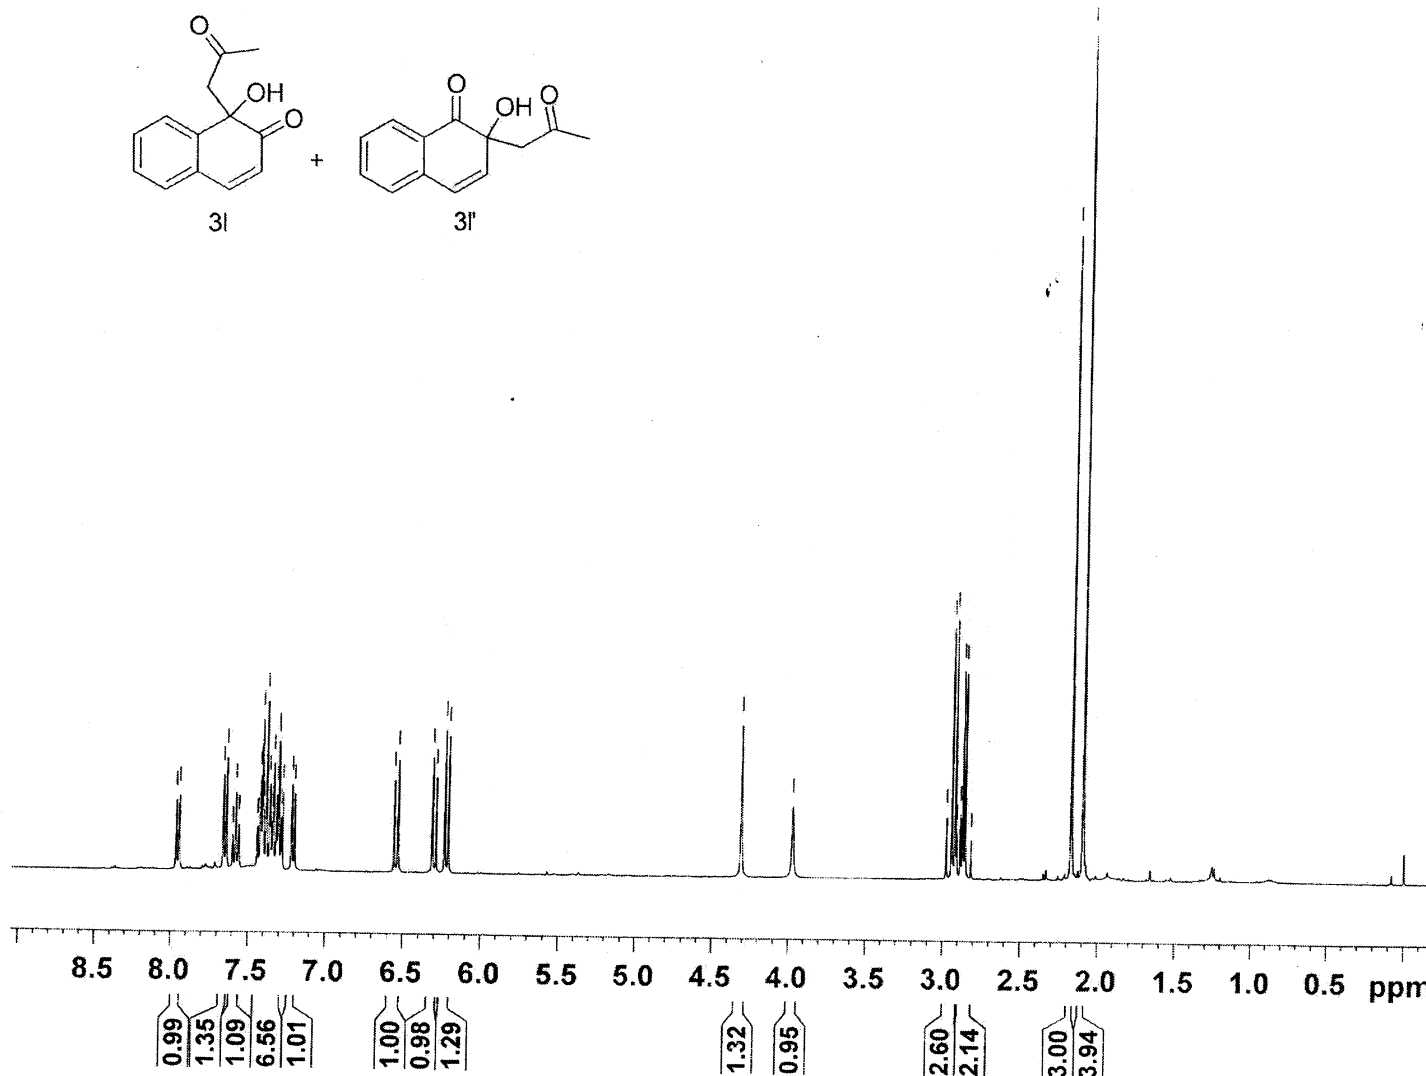



205.803  
205.450  
202.704  
201.179

145.145  
142.461  
137.124  
135.026  
134.318  
130.274  
129.468  
128.731  
128.390  
128.318  
128.241  
127.512  
127.142  
126.012  
125.881  
122.771

77.533  
77.319  
77.000  
76.682  
74.717

55.781  
52.614

31.947  
31.708

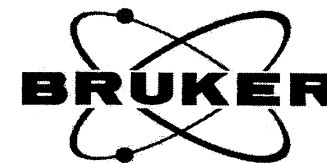

NAME guozw-lihj-201-20081208  
EXPNO 2  
PROCNO 1  
Date\_ 20080708  
Time 15.05  
INSTRUM spect  
PROBHD 5 mm PABBO BB-  
PULPROG zgpg30  
TD 65536  
SOLVENT CDC13  
NS 200  
DS 4  
SWH 24038.461 Hz  
FIDRES 0.366798 Hz  
AQ 1.3631988 sec  
RG 912  
DW 20.800 usec  
DE 6.50 usec  
TE 292.4 K  
D1 2.00000000 sec  
D11 0.03000000 sec  
TD0 1

==== CHANNEL f1 =====  
NUC1 13C  
P1 12.80 usec  
PL1 2.00 dB  
PL1W 55.31277084 W  
SFO1 100.6228298 MHz

==== CHANNEL f2 =====  
CPDPRG2 waltz16  
NUC2 1H  
PCPD2 80.00 usec  
PL2 -1.00 dB  
PL12 15.50 dB  
PL13 120.00 dB  
PL2W 17.01305389 W  
PL12W 0.38087484 W  
PL13W 0.00000000 W  
SFO2 400.1316005 MHz  
SI 32768  
SF 100.6127839 MHz  
WDW EM  
SSB 0  
LB 1.00 Hz  
GB 0  
PC 1.40

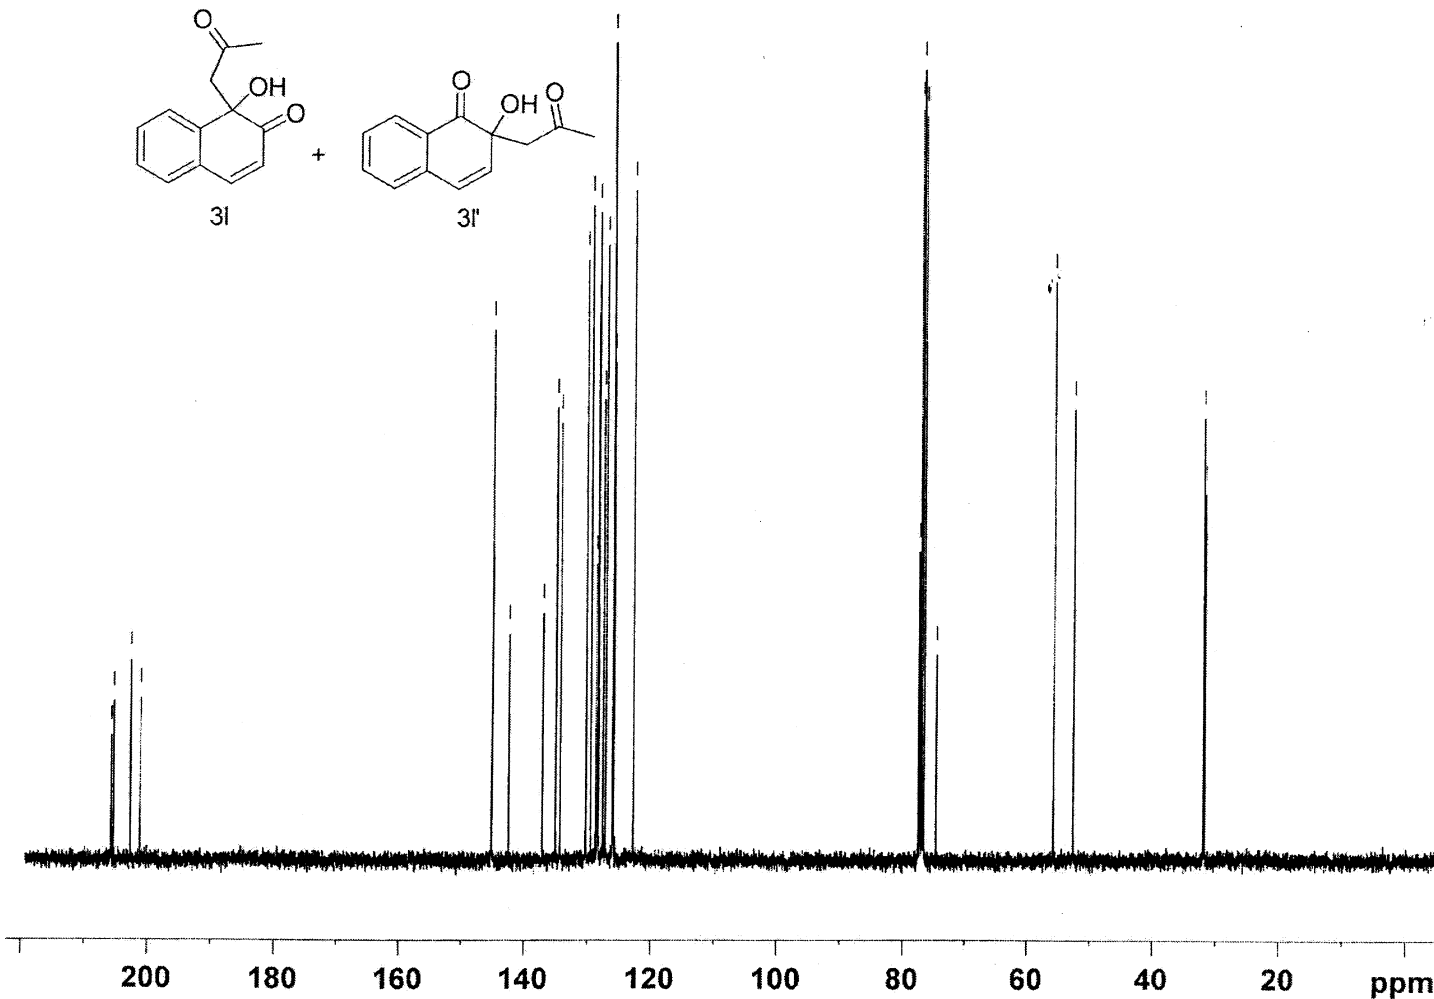

7.914  
7.901  
7.874  
7.861  
7.794  
7.790  
7.785  
7.779  
7.738  
7.735  
7.732  
7.727  
7.723  
7.667  
7.655  
7.642  
7.422  
7.409  
7.396  
7.387  
7.384  
7.378  
7.372  
7.368  
7.261  
4.512

2.983  
2.958  
2.801  
2.777  
2.063

0.000

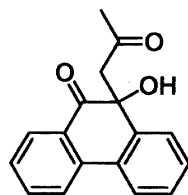

3m

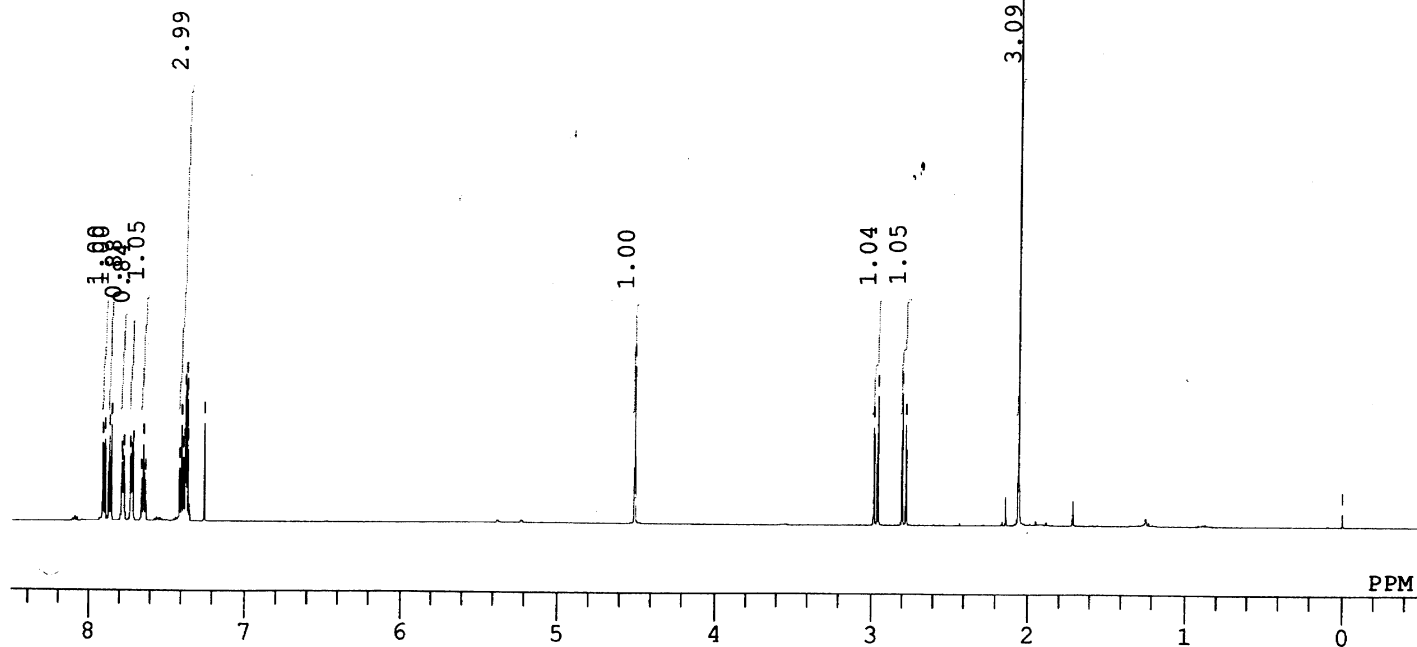

DFILE C:\DOCUME~1\nmr\LOCALS~1\Te  
COMNT lee-R869-2H  
DATIM 13-02-2009 22:27:56  
OBNUC 1H  
EXMOD single\_pulse.ex2  
OBFRQ 600.17 MHz  
OBSET 5.30 KHz  
OBFIN 5.47 Hz  
POINT 32768  
FREQU 11261.26 Hz  
SCANS 8  
ACQTM 2.9098 sec  
PD 5.0000 sec  
PW1 6.90 usec  
IRNUC 1H  
CTEMP 19.7 c  
SLVNT CDCL3  
EXREF 0.00 ppm  
BF 0.12 Hz  
RGAIN 34

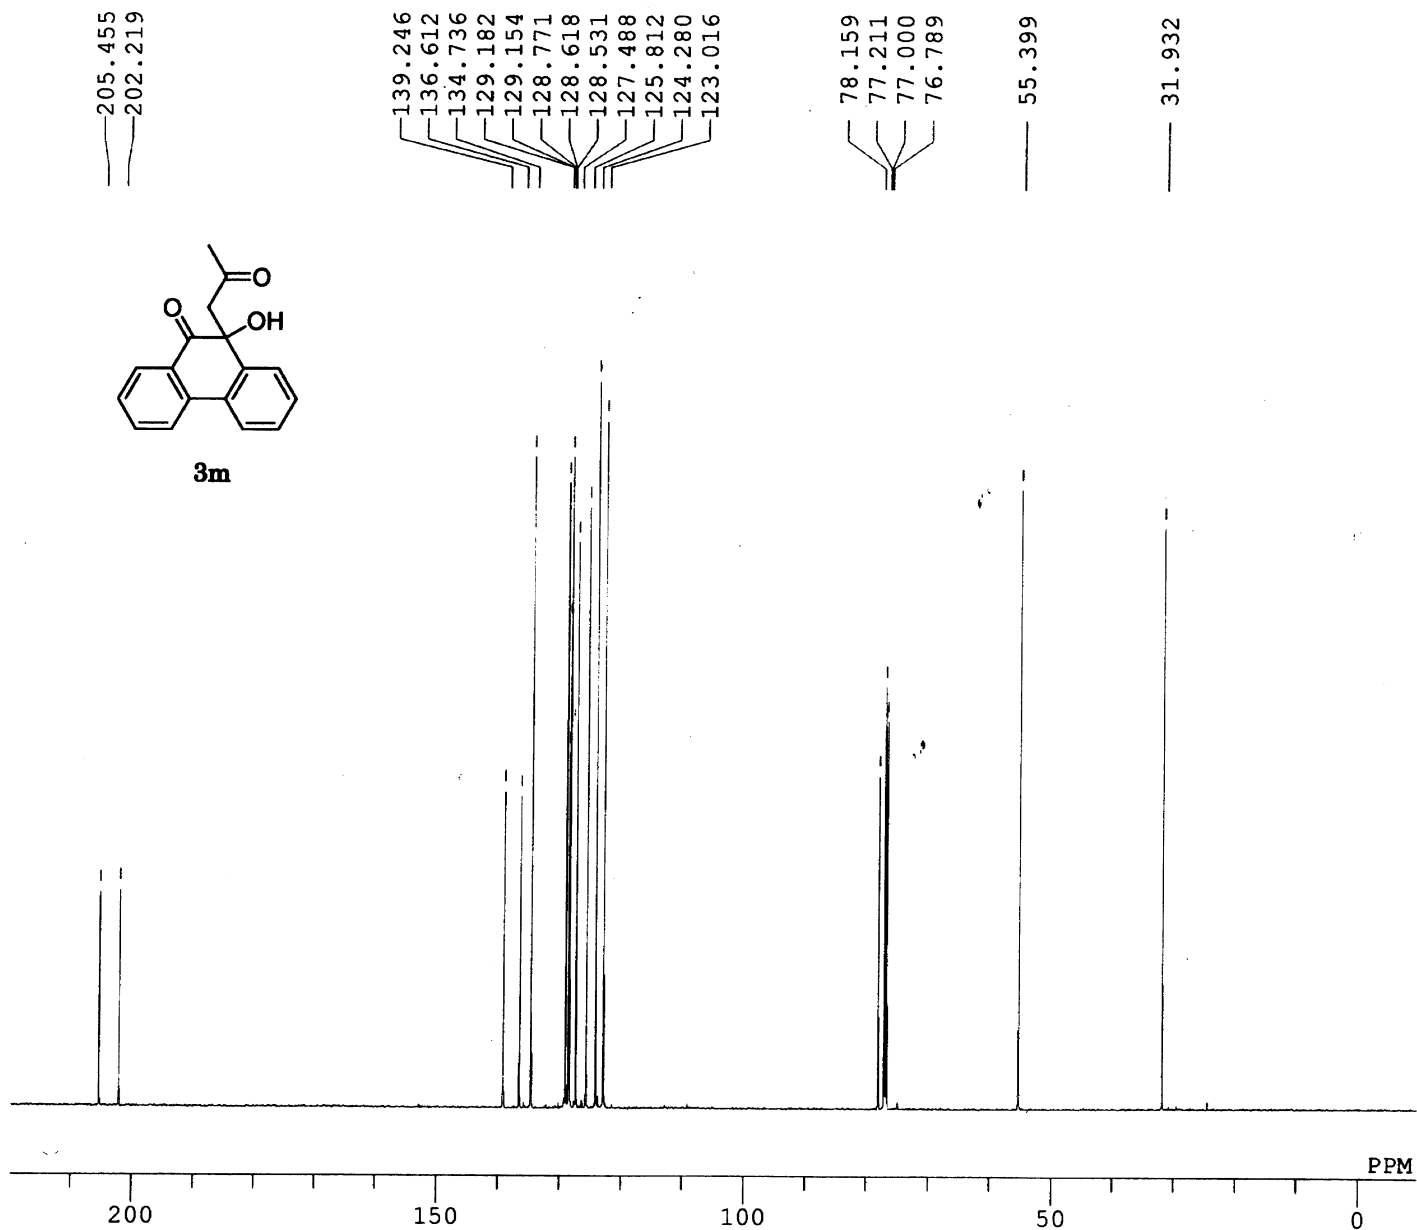

DFILE C:\DOCUME~1\nmr\LOCALS~1\Te  
COMNT lee-R869-2C  
DATIM 13-02-2009 23:05:22  
OBNUC 13C  
EXMOD single\_pulse\_dec  
OBFRQ 150.92 MHz  
OBSET 8.52 KHz  
OBFIN 1.74 Hz  
POINT 32768  
FREQU 47348.49 Hz  
SCANS 800  
ACQTM 0.6921 sec  
PD 2.0000 sec  
PW1 4.17 usec  
IRNUC 1H  
CTEMP 20.1 c  
SLVNT CDCL3  
EXREF 77.00 ppm  
BF 1.20 Hz  
RGAIN 60

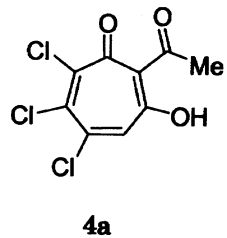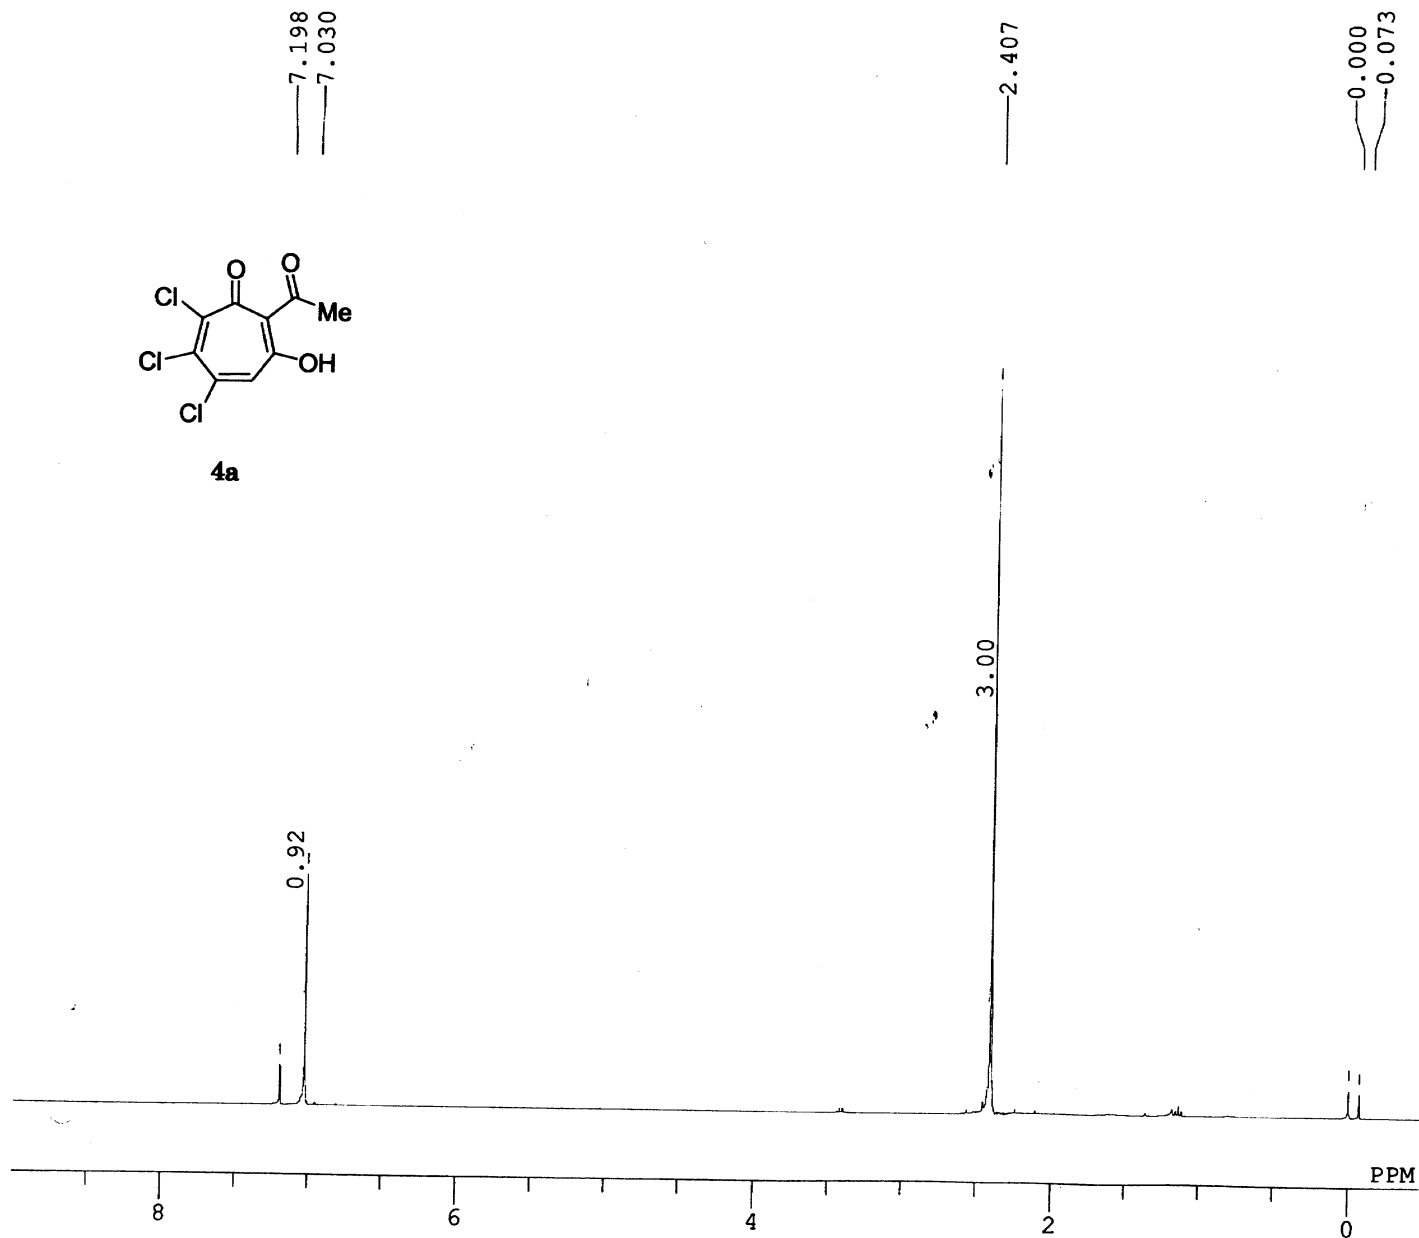

DFILE C:\DOCUME~1\nmr\LOCALS~1\Te  
COMNT lee-R876-3H  
DATIM 17-02-2009 15:01:52  
OBNUC 1H  
EXMOD single\_pulse.ex2  
OBFRQ 399.78 MHz  
OBSET 4.19 KHz  
OBFIN 7.29 Hz  
POINT 32768  
FREQU 7503.00 Hz  
SCANS 8  
ACQTM 4.3673 sec  
PD 5.0000 sec  
PW1 5.50 usec  
IRNUC 1H  
CTEMP 19.4 c  
SLVNT CDCL3  
EXREF 0.00 ppm  
BF 0.12 Hz  
RGAIN 40

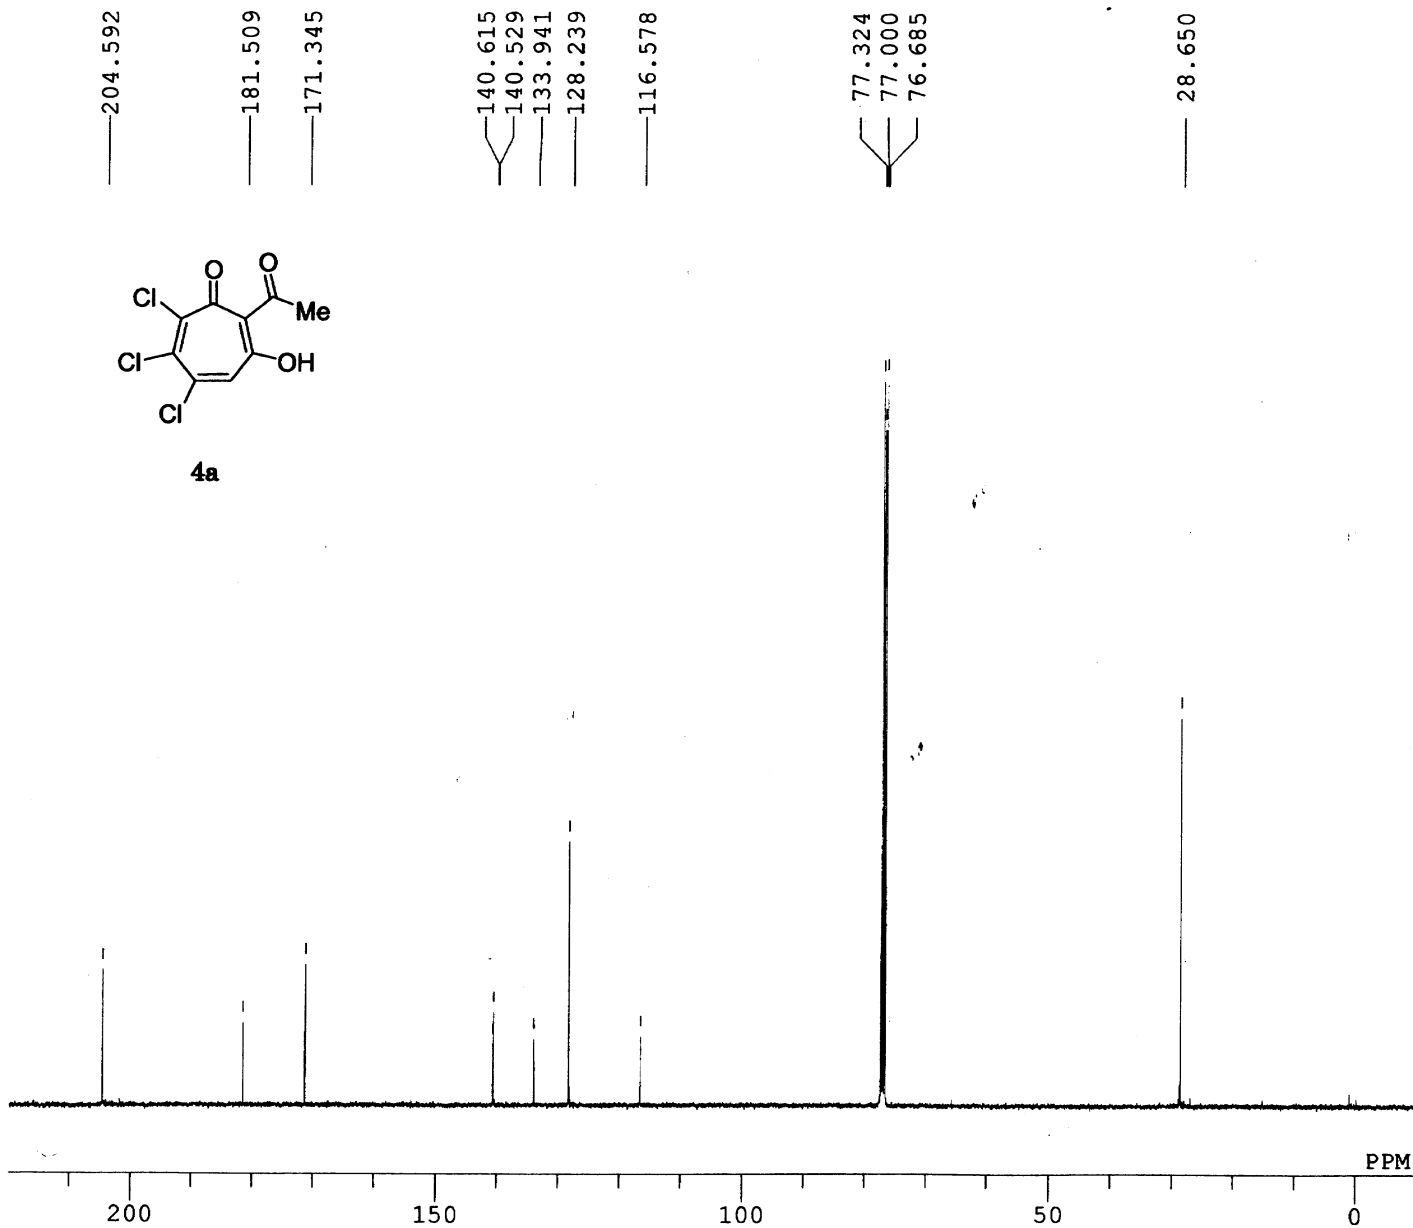

DFILE C:\DOCUME~1\nmr\LOCALS~1\Te  
COMNT lee-R876-3C  
DATIM 17-02-2009 16:47:04  
OBNUC 13C  
EXMOD single\_pulse\_dec  
OBFRQ 100.53 MHz  
OBSET 5.35 KHz  
OBFIN 5.86 Hz  
POINT 32768  
FREQU 31407.03 Hz  
SCANS 2001  
ACQTM 1.0433 sec  
PD 2.0000 sec  
PW1 3.00 usec  
IRNUC 1H  
CTEMP 19.6 c  
SLVNT CDCL3  
EXREF 77.00 ppm  
BF 1.20 Hz  
RGAIN 60

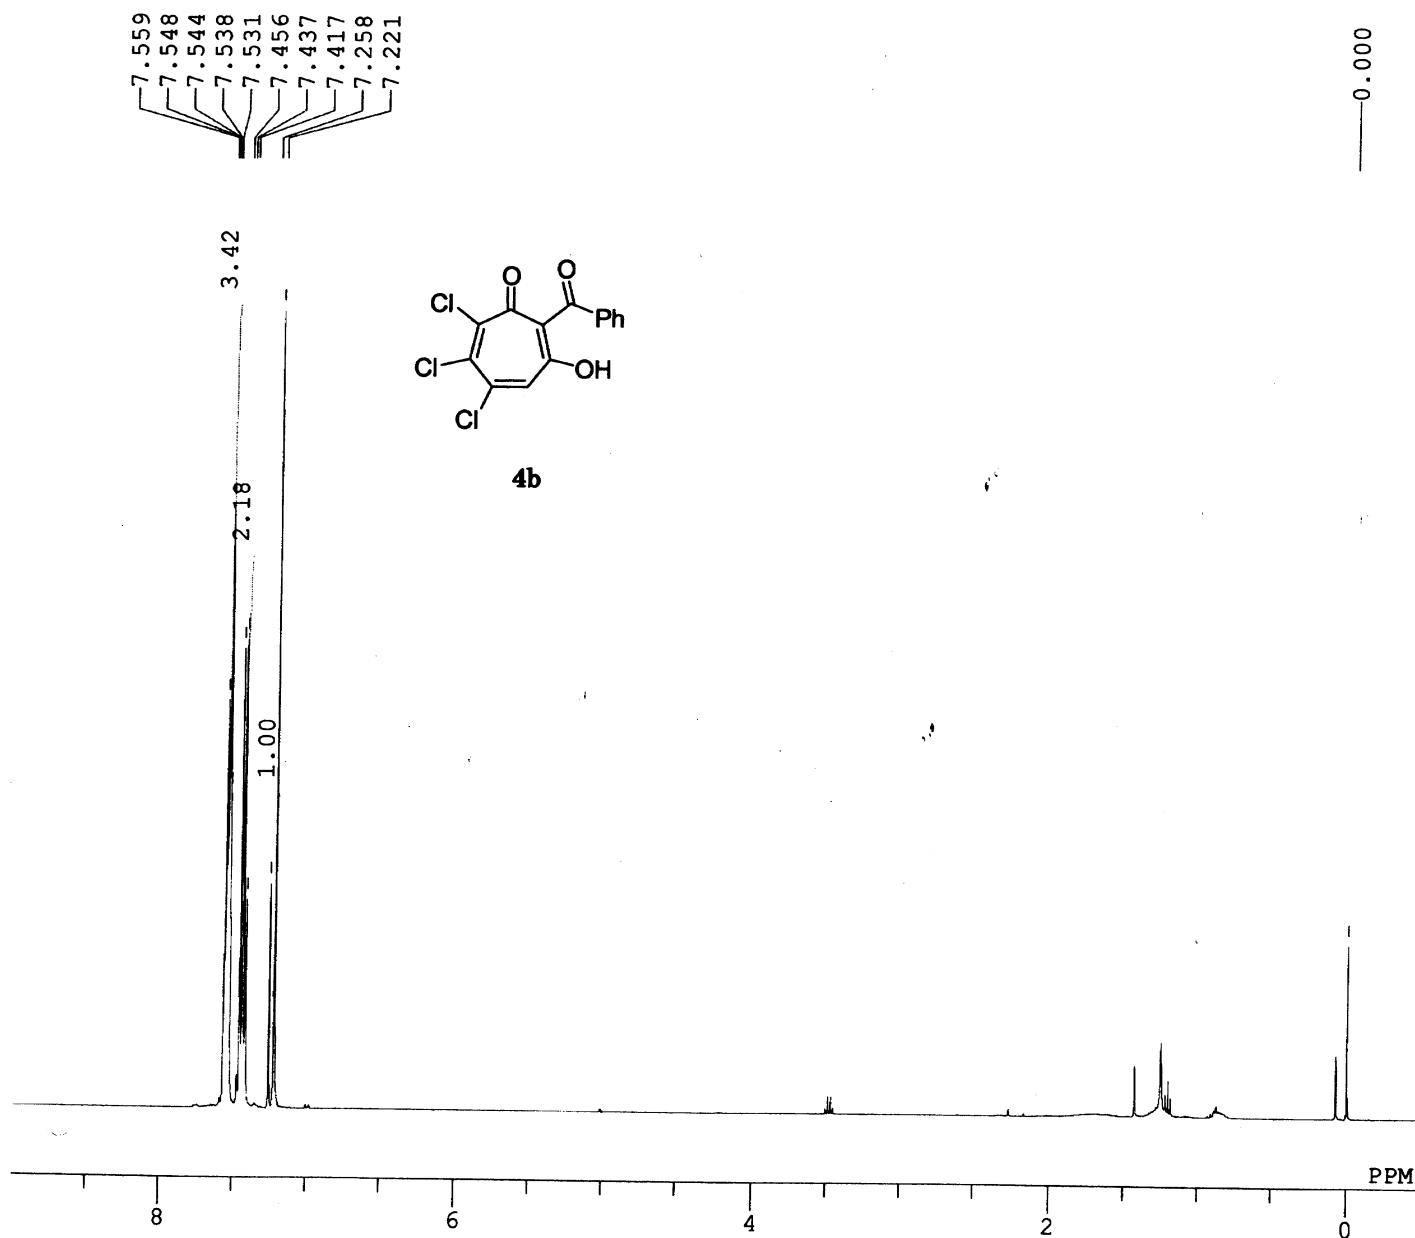

DFILE C:\DOCUME~1\nmr\LOCALS~1\Te  
COMNT lee-R867-3H  
DATIM 11-02-2009 21:07:48  
OBNUC 1H  
EXMOD single\_pulse.ex2  
OBFRQ 395.88 MHz  
OBSET 6.28 KHz  
OBFIN 0.87 Hz  
POINT 32768  
FREQU 7422.80 Hz  
SCANS 8  
ACQTM 4.4145 sec  
PD 5.0000 sec  
PW1 5.50 usec  
IRNUC 1H  
CTEMP 20.7 c  
SLVNT CDCL3  
EXREF 0.00 ppm  
BF 0.12 Hz  
RGAIN 36

200.241  
181.435  
168.636

141.179  
140.834  
136.484  
134.798  
132.844  
128.504  
128.274  
128.111  
115.312

77.326  
77.000  
76.684

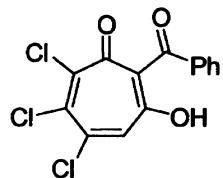

4b

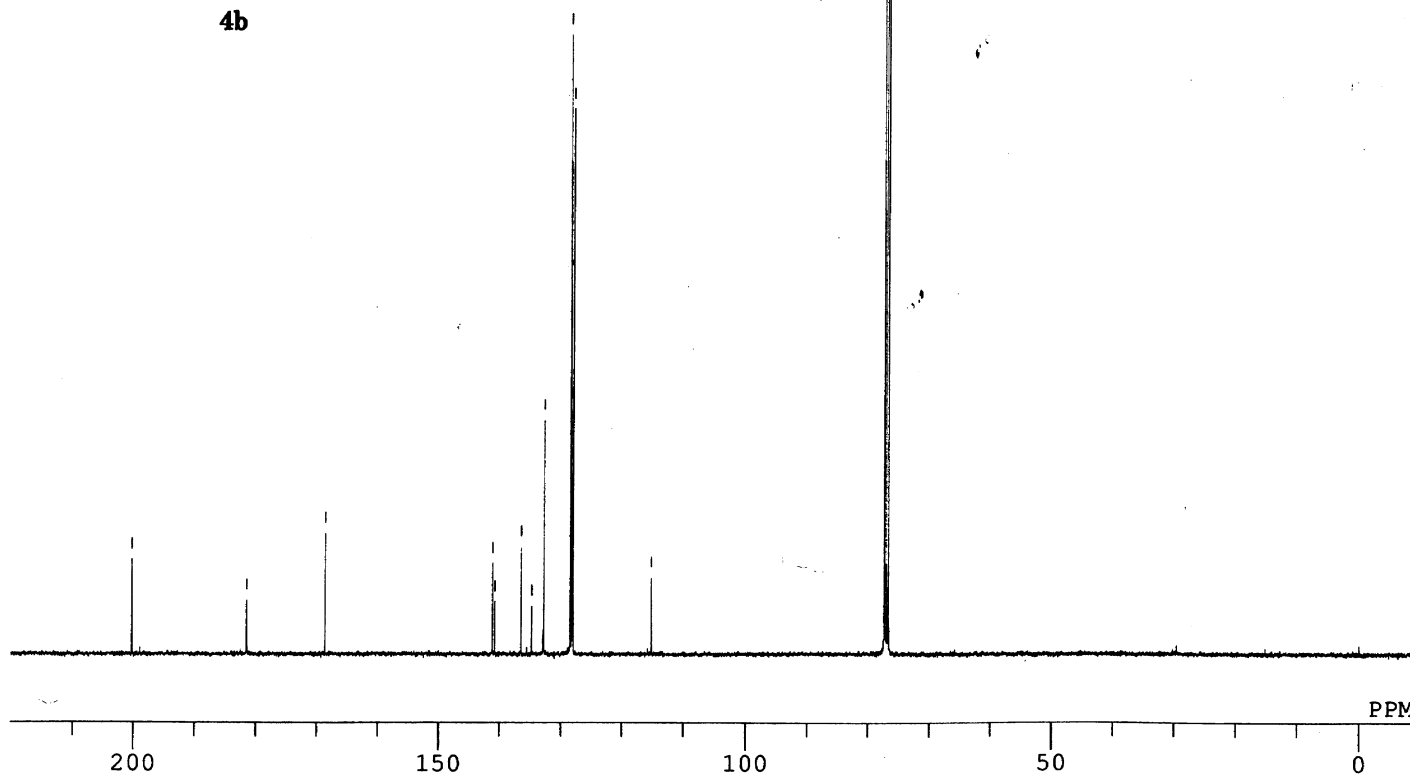

DFILE C:\DOCUME~1\nmr\LOCALS~1\Te  
COMNT lee-R867-3C  
DATIM 11-02-2009 22:52:51  
OBNUC 13C  
EXMOD single\_pulse\_dec  
OBFRQ 99.55 MHz  
OBSET 5.13 KHz  
OBFIN 0.98 Hz  
POINT 32768  
FREQU 31250.00 Hz  
SCANS 2000  
ACQTM 1.0486 sec  
PD 2.0000 sec  
PW1 3.20 usec  
IRNUC 1H  
CTEMP 21.0 c  
SLVNT CDCL3  
EXREF 77.00 ppm  
BF 1.20 Hz  
RGAIN 60

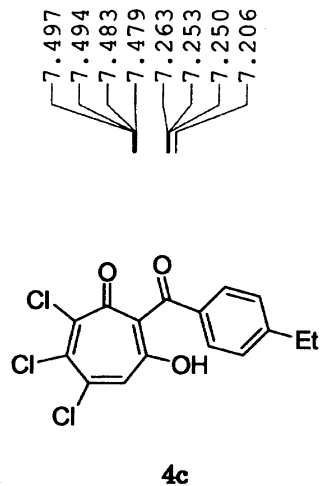

2.717  
2.704  
2.692  
2.679

1.268  
1.255  
1.243

0.076  
0.000

DFILE C:\DOCUME~1\nmr\LOCALS~1\Te  
COMNT lee-R868-3H  
DATIM 12-02-2009 16:56:32  
OBNUC 1H  
EXMOD single\_pulse.ex2  
OBFREQ 600.17 MHz  
OBSET 5.30 KHz  
OBFIN 5.47 Hz  
POINT 32768  
FREQU 11261.26 Hz  
SCANS 8  
ACQTM 2.9098 sec  
PD 5.0000 sec  
PW1 6.90 usec  
IRNUC 1H  
CTEMP 19.1 c  
SLVNT CDCL3  
EXREF 0.00 ppm  
BF 0.12 Hz  
RGAIN 42

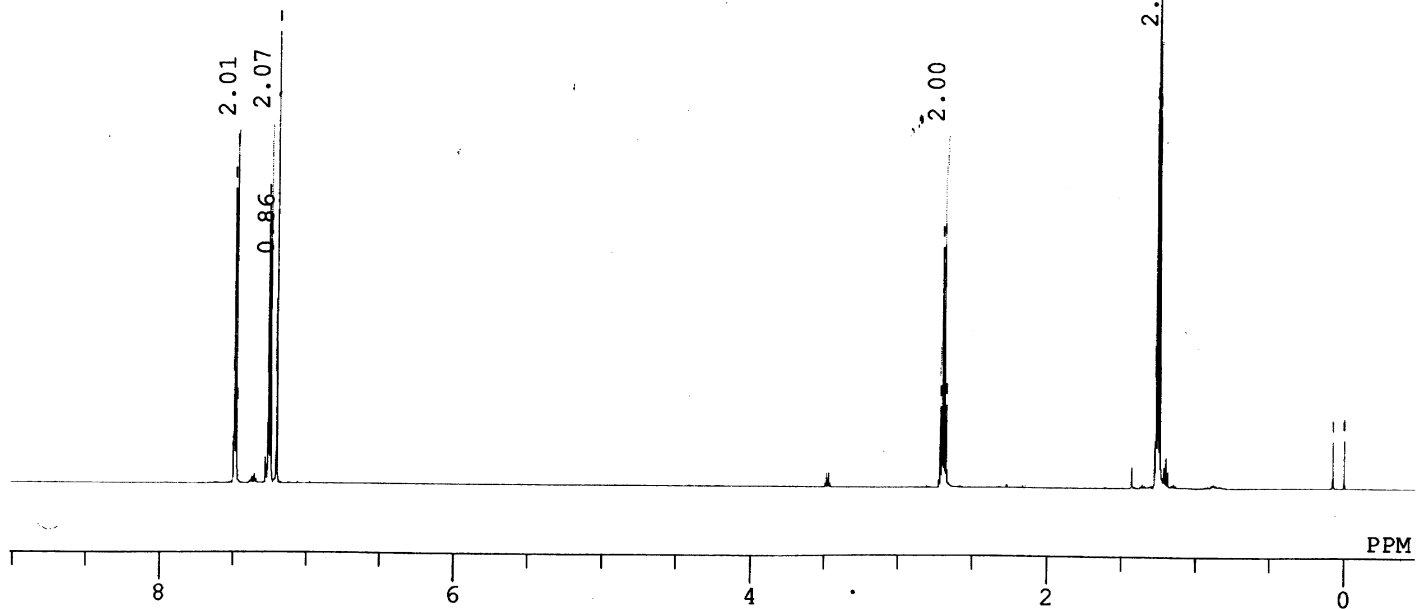



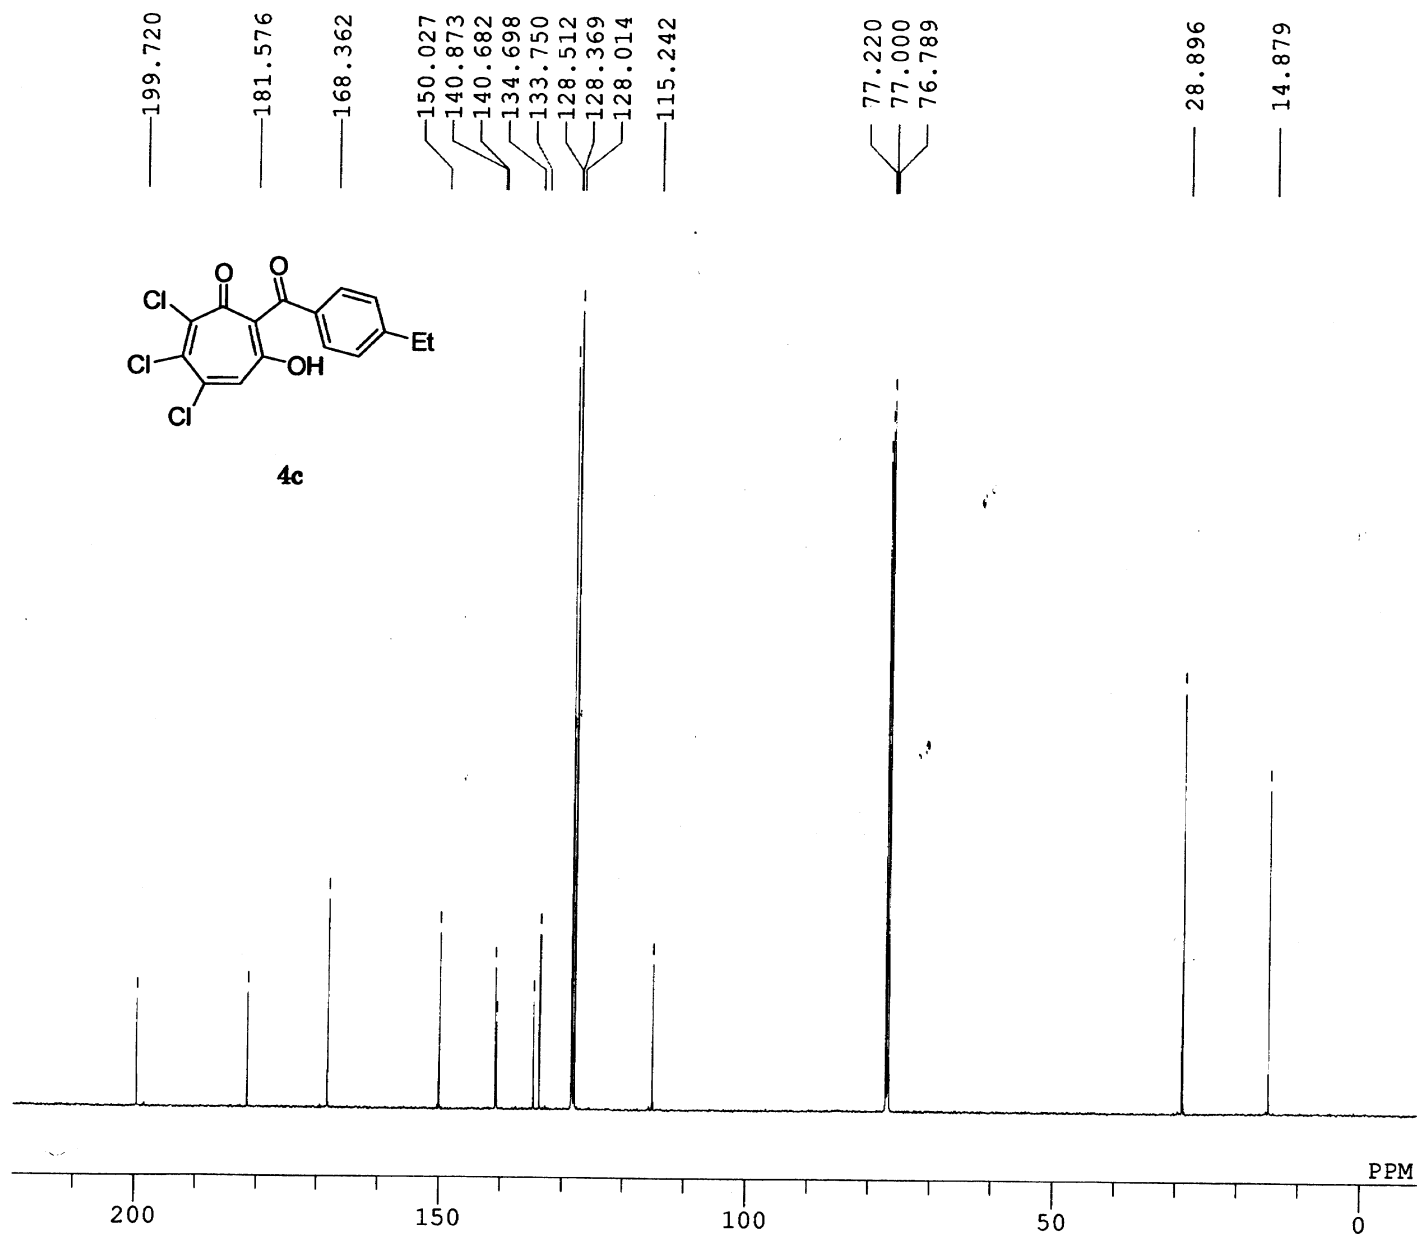

DFILE C:\DOCUME~1\nmr\LOCALS~1\Te  
COMNT lee-R868-3C  
DATIM 12-02-2009 17:24:45  
OBNUC 13C  
EXMOD single\_pulse\_dec  
OBFRQ 150.92 MHz  
OBSET 8.52 KHz  
OBFIN 1.74 Hz  
POINT 32768  
FREQU 47348.49 Hz  
SCANS 602  
ACQTM 0.6921 sec  
PD 2.0000 sec  
PW1 4.17 usec  
IRNUC 1H  
CTEMP 20.3 c  
SLVNT CDCL3  
EXREF 77.00 ppm  
BF 1.20 Hz  
RGAIN 60

7.492  
7.478  
7.419  
7.405  
7.260  
7.225

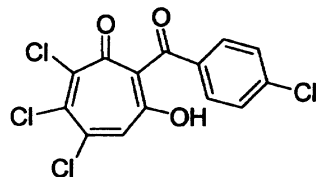

4d

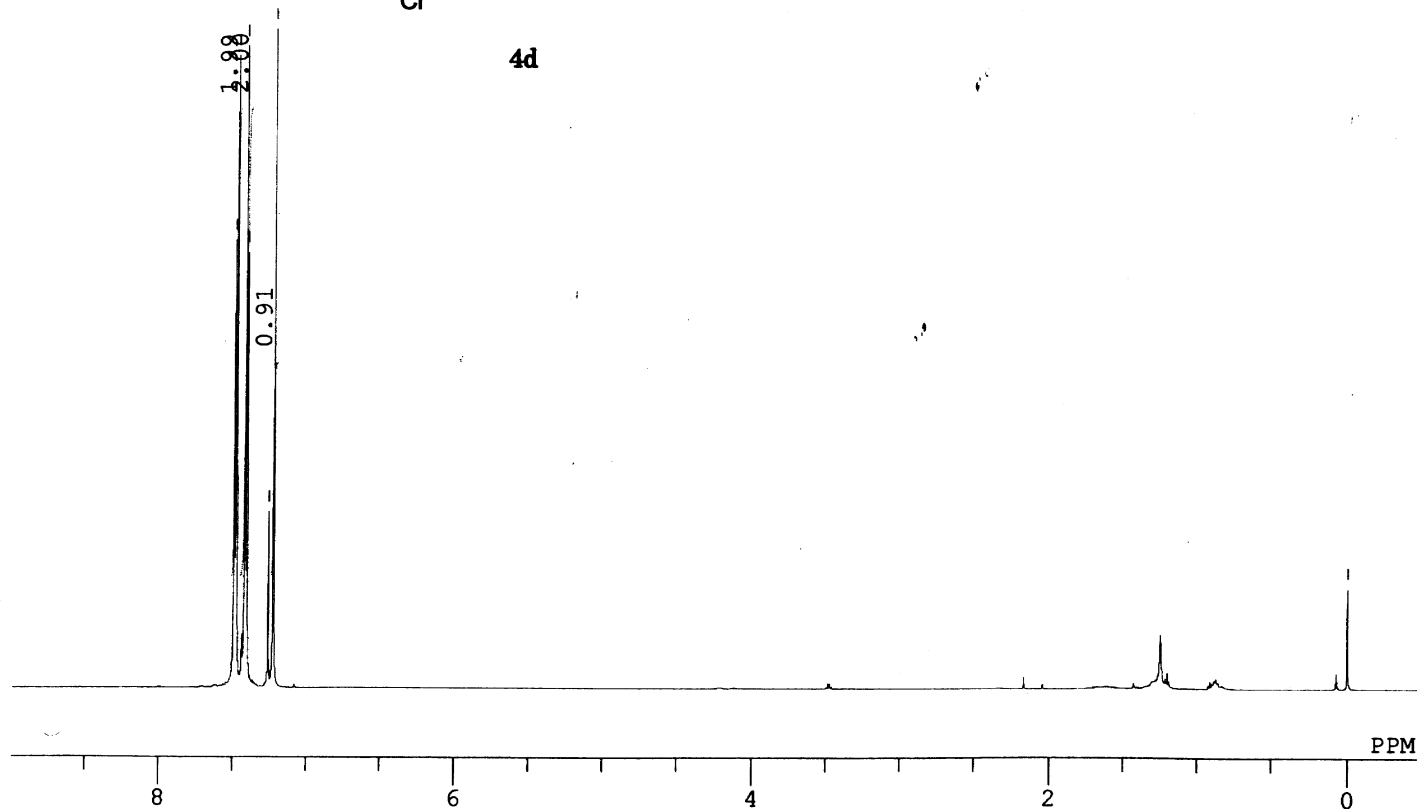

0.000

DFILE C:\DOCUME~1\nmr\LOCALS~1\Te  
COMNT lee-R872-3H  
DATIM 14-02-2009 18:00:38  
OBNUC 1H  
EXMOD single\_pulse.ex2  
OBFRQ 600.17 MHz  
OBSET 5.30 KHz  
OBFIN 5.47 Hz  
POINT 32768  
FREQU 11261.26 Hz  
SCANS 8  
ACQTM 2.9098 sec  
PD 5.0000 sec  
PW1 6.90 usec  
IRNUC 1H  
CTEMP 19.2 c  
SLVNT CDCL3  
EXREF 0.00 ppm  
BF 0.12 Hz  
RGAIN 50

198.963  
181.250  
168.822  
141.515  
140.940  
139.226  
135.109  
134.851  
129.489  
128.876  
128.235  
115.194

77.211  
77.000  
76.789

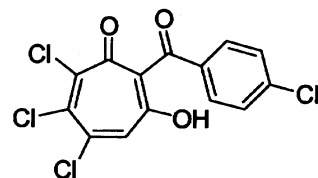

4d

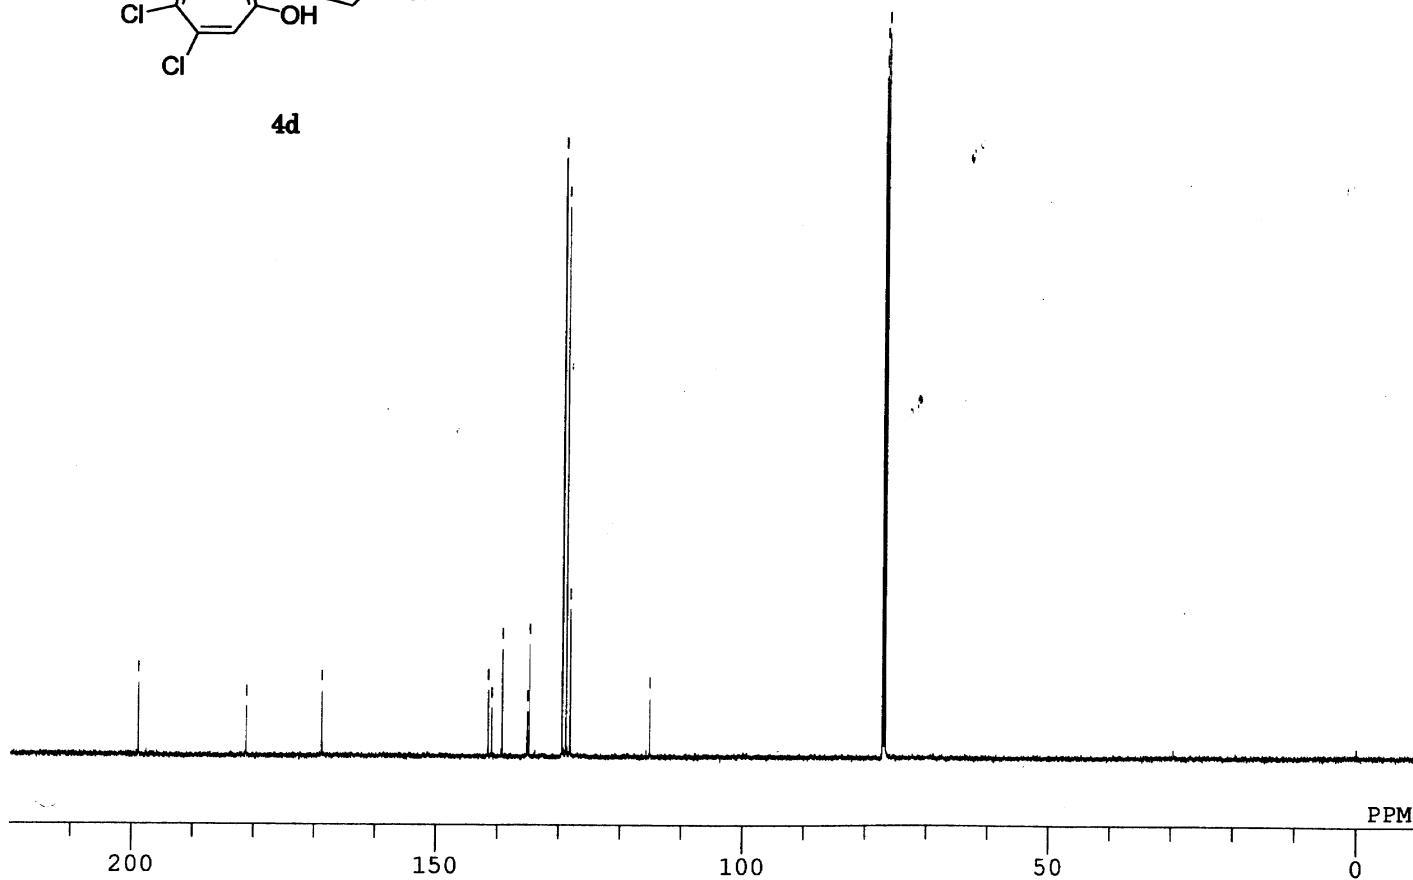

DFILE C:\DOCUME~1\nmr\LOCALS~1\Te  
COMNT lee-R872-3C  
DATIM 14-02-2009 18:47:43  
OBNUC 13C  
EXMOD single\_pulse\_dec  
OBFRQ 150.92 MHz  
OBSET 8.52 KHz  
OBFIN 1.74 Hz  
POINT 32768  
FREQU 47348.49 Hz  
SCANS 1000  
ACQTM 0.6921 sec  
PD 2.0000 sec  
PW1 4.17 usec  
IRNUC 1H  
CTEMP 20.3 c  
SLVNT CDCL3  
EXREF 77.00 ppm  
BF 1.20 Hz  
RGAIN 50

7.593  
7.587  
7.573  
7.415  
7.401  
7.397  
7.261  
7.226

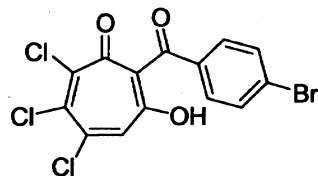

4e

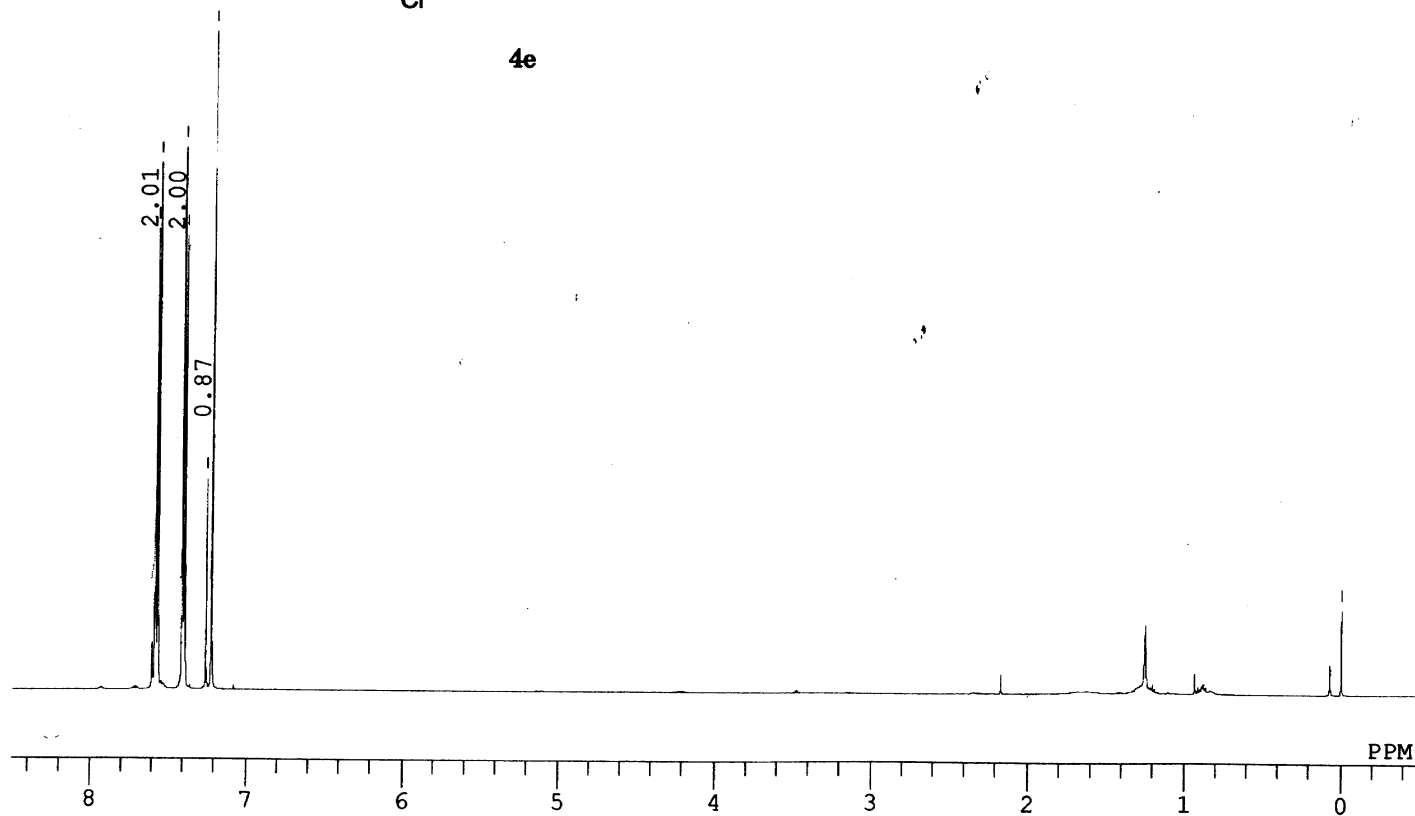

0.000

DFILE C:\DOCUME~1\nmr\LOCALS~1\Te  
COMNT lee-R870-3H  
DATIM 14-02-2009 14:06:41  
OBNUC 1H  
EXMOD single\_pulse.ex2  
OBFRQ 600.17 MHz  
OBSET 5.30 KHz  
OBFIN 5.47 Hz  
POINT 32768  
FREQU 11261.26 Hz  
SCANS 8  
ACQTM 2.9098 sec  
PD 5.0000 sec  
PW1 6.90 usec  
IRNUC 1H  
CTEMP 18.9 c  
SLVNT CDCL3  
EXREF 0.00 ppm  
BF 0.12 Hz  
RGAIN 50

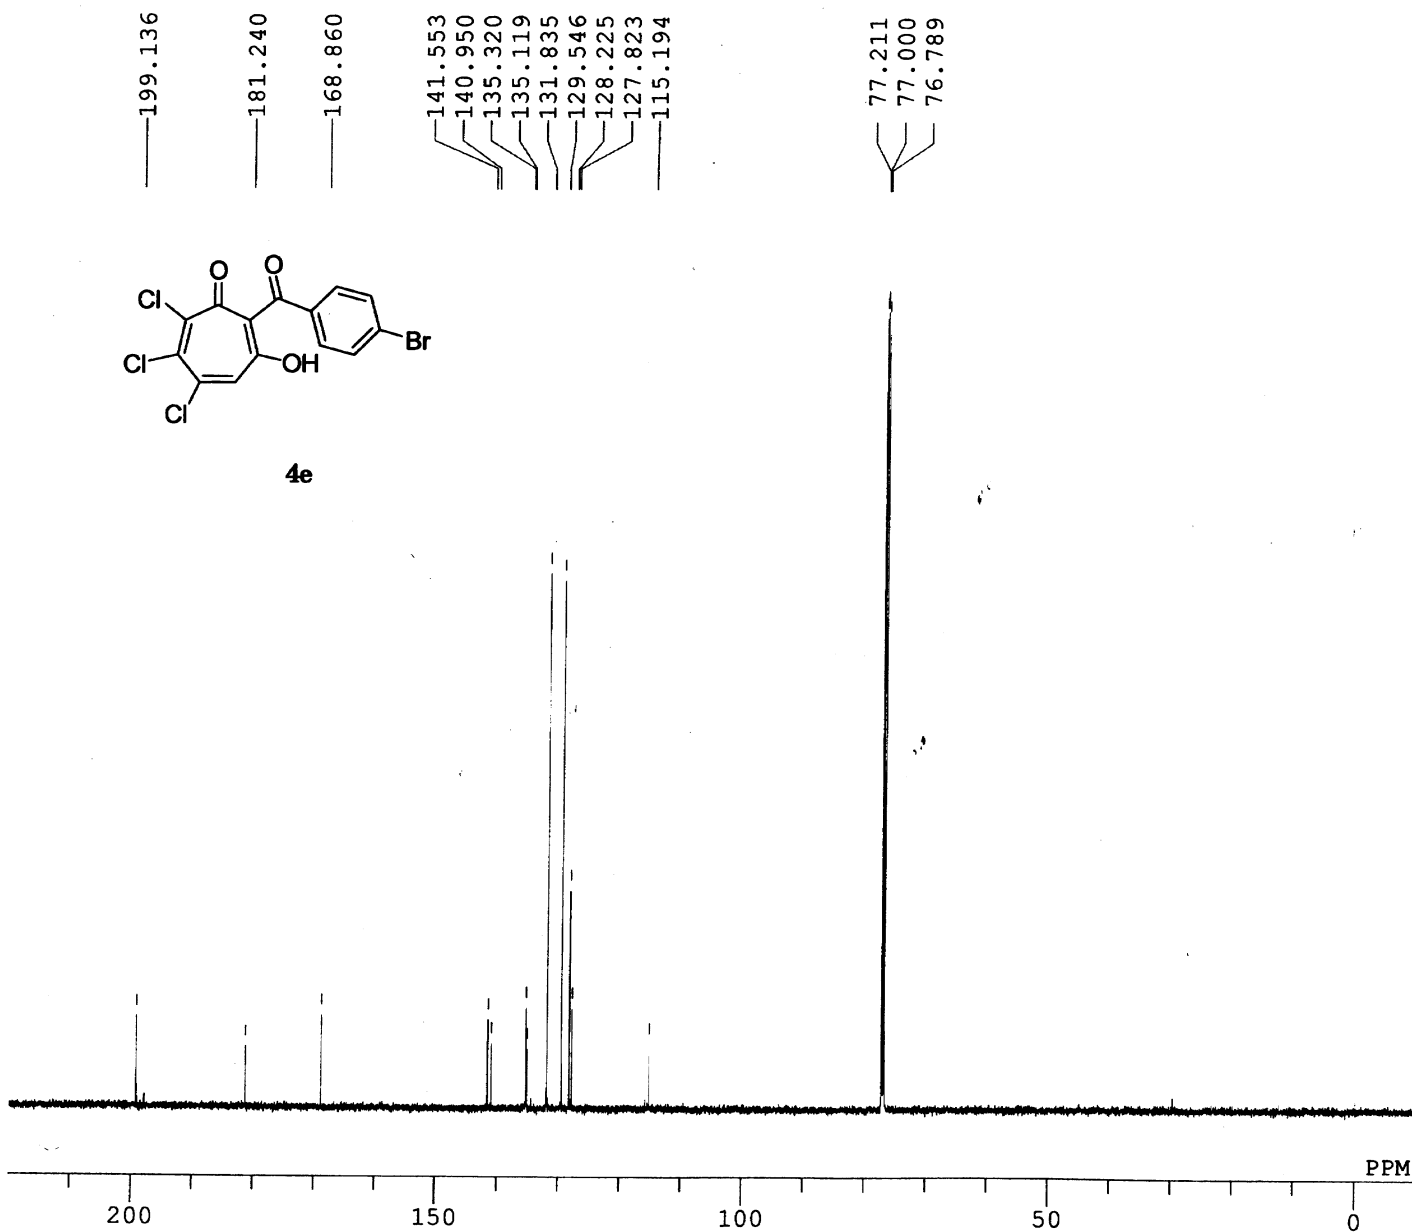

DFILE C:\DOCUME~1\nmr\LOCALS~1\Te  
COMMT lee-R870-3C  
DATIM 14-02-2009 14:35:12  
OBNUC 13C  
EXMOD single\_pulse\_dec  
OBFRQ 150.92 MHz  
OBSET 8.52 KHz  
OBFIN 1.74 Hz  
POINT 32768  
FREQU 47348.49 Hz  
SCANS 610  
ACQTM 0.6921 sec  
PD 2.0000 sec  
PW1 4.17 usec  
IRNUC 1H  
CTEMP 20.2 c  
SLVNT CDCL3  
EXREF 77.00 ppm  
BF 1.20 Hz  
RGAIN 60

C:\DOCUME~1\nmr\LOCALS~1\Temp\lee-R874-3H-1.jdf  
lee-R874-2H

8.052  
7.874  
7.869  
7.861  
7.855  
7.843  
7.829  
7.596  
7.593  
7.583  
7.579  
7.573  
7.571  
7.560  
7.557  
7.533  
7.531  
7.520  
7.518  
7.508  
7.506  
7.240  
7.214

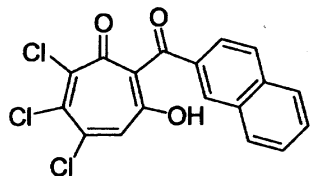

4f

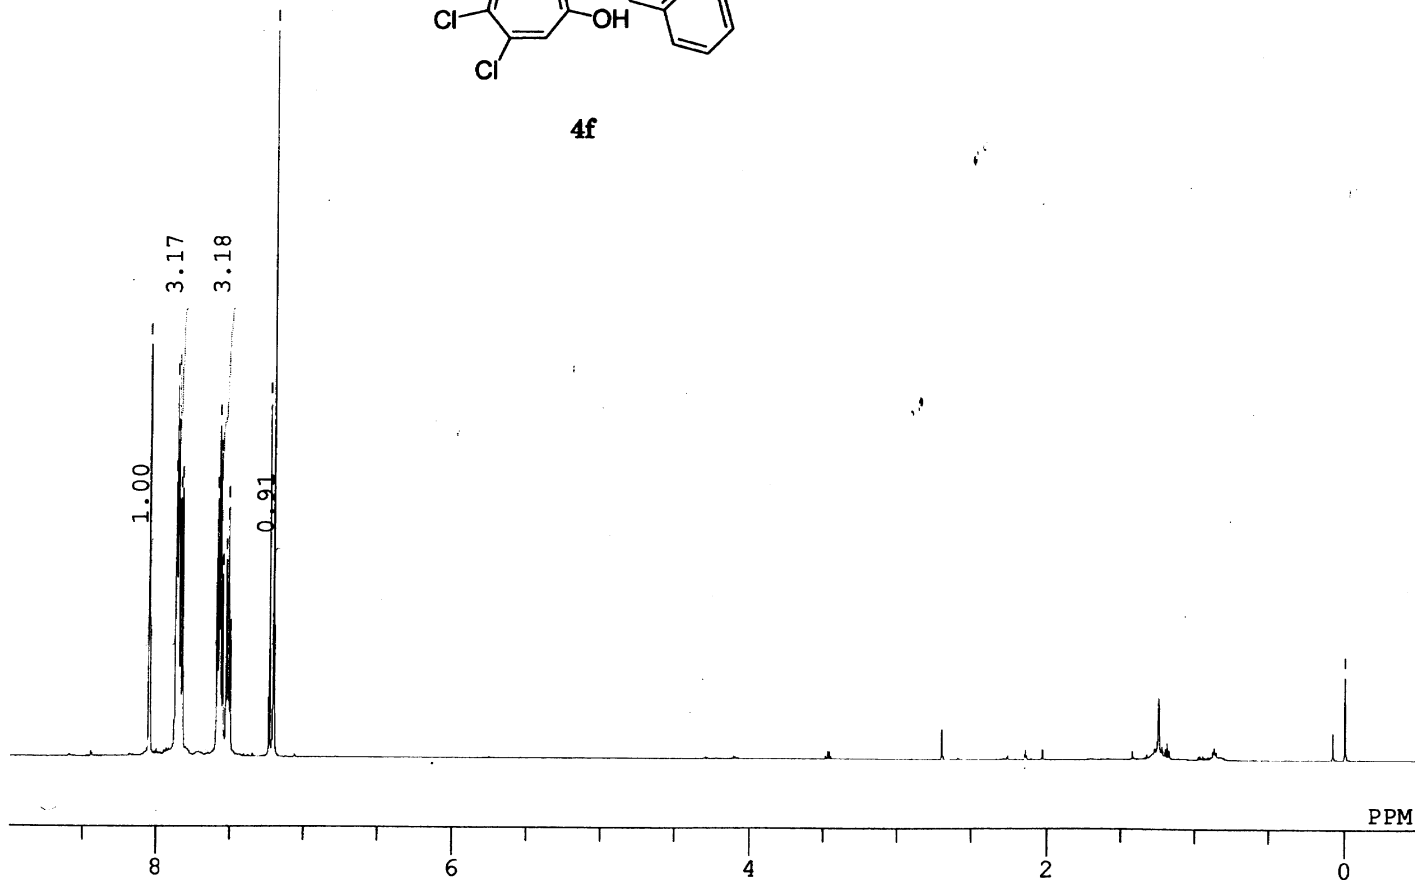

0.000

DFILE C:\DOCUME~1\nmr\LOCALS~1\Te  
COMNT lee-R874-2H  
DATIM 16-02-2009 16:03:12  
OBNUC 1H  
EXMOD single\_pulse.ex2  
OBFRQ 600.17 MHz  
OBSET 5.30 KHz  
OBFIN 5.47 Hz  
POINT 32768  
FREQU 11261.26 Hz  
SCANS 8  
ACQTM 2.9098 sec  
PD 5.0000 sec  
PW1 6.90 usec  
IRNUC 1H  
CTEMP 19.1 c  
SLVNT C6D6  
EXREF 0.00 ppm  
BF 0.12 Hz  
RGAIN 42

199.911  
181.566  
168.372  
141.074  
140.682  
135.291  
134.832  
133.501  
132.151  
129.834  
129.230  
128.560  
128.464  
128.302  
127.804  
126.961  
123.964  
115.500

77.211  
77.000  
76.789

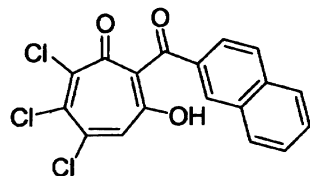

4f

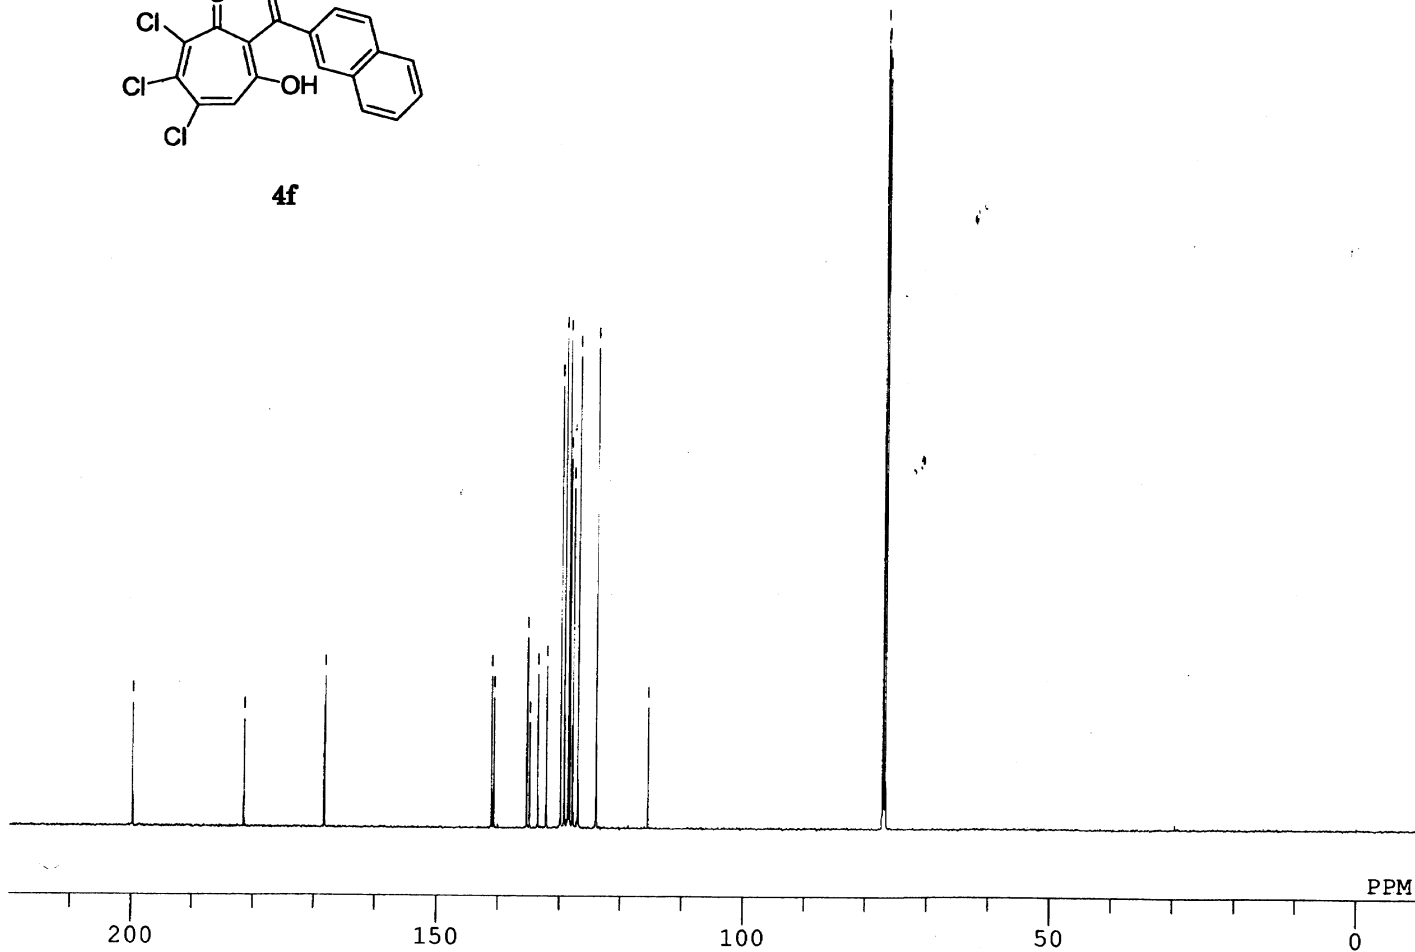

DFILE C:\DOCUME~1\nmr\LOCALS~1\Te  
COMNT lee-R874-3C  
DATIM 16-02-2009 16:49:30  
OBNUC 13C  
EXMOD single\_pulse\_dec  
OBFRQ 150.92 MHz  
OBSET 8.52 KHz  
OBFIN 1.74 Hz  
POINT 32768  
FREQU 47348.49 Hz  
SCANS 1000  
ACQTM 0.6921 sec  
PD 2.0000 sec  
PW1 4.17 usec  
IRNUC 1H  
CTEMP 20.1 c  
SLVNT C6D6  
EXREF 77.00 ppm  
BF 1.20 Hz  
RGAIN 60

#### 4) Standard isotopic distribution for compounds containing chlorine and bromine

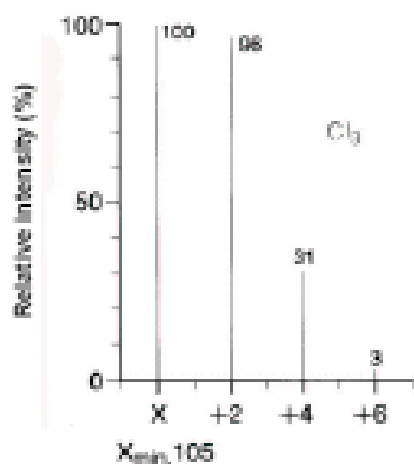

(a) Compound with Cl<sub>3</sub>

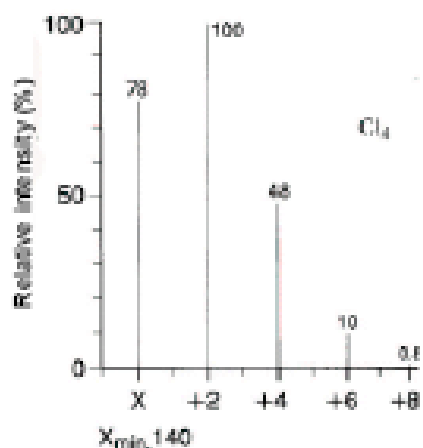

(b) Compound with Cl<sub>4</sub>

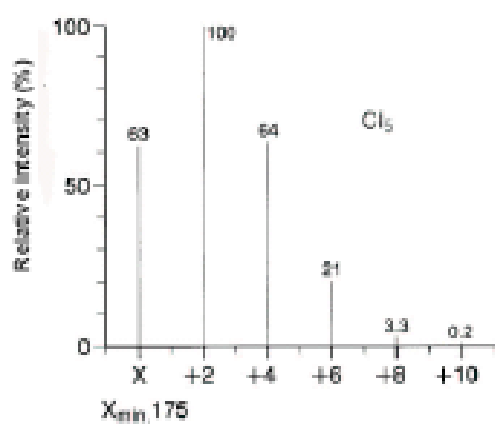

(c) Compound with Cl<sub>5</sub>

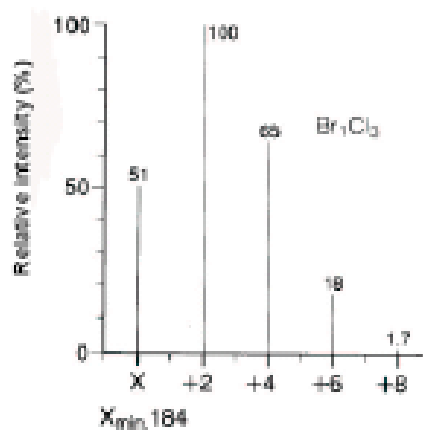

(d) Compound with Br<sub>1</sub>Cl<sub>3</sub>

#### 5) Copies of the representative mass spectra



# Peking University Mass Spectrometry Sample Analysis Report

## Analysis Info

Analysis Name 81345\_20081209\_000001.d  
Sample 1  
Comment ESI Positive

Acquisition Date 12/9/2008 3:46:49 PM  
Instrument Bruker Apex IV FTMS  
Operator Peking University

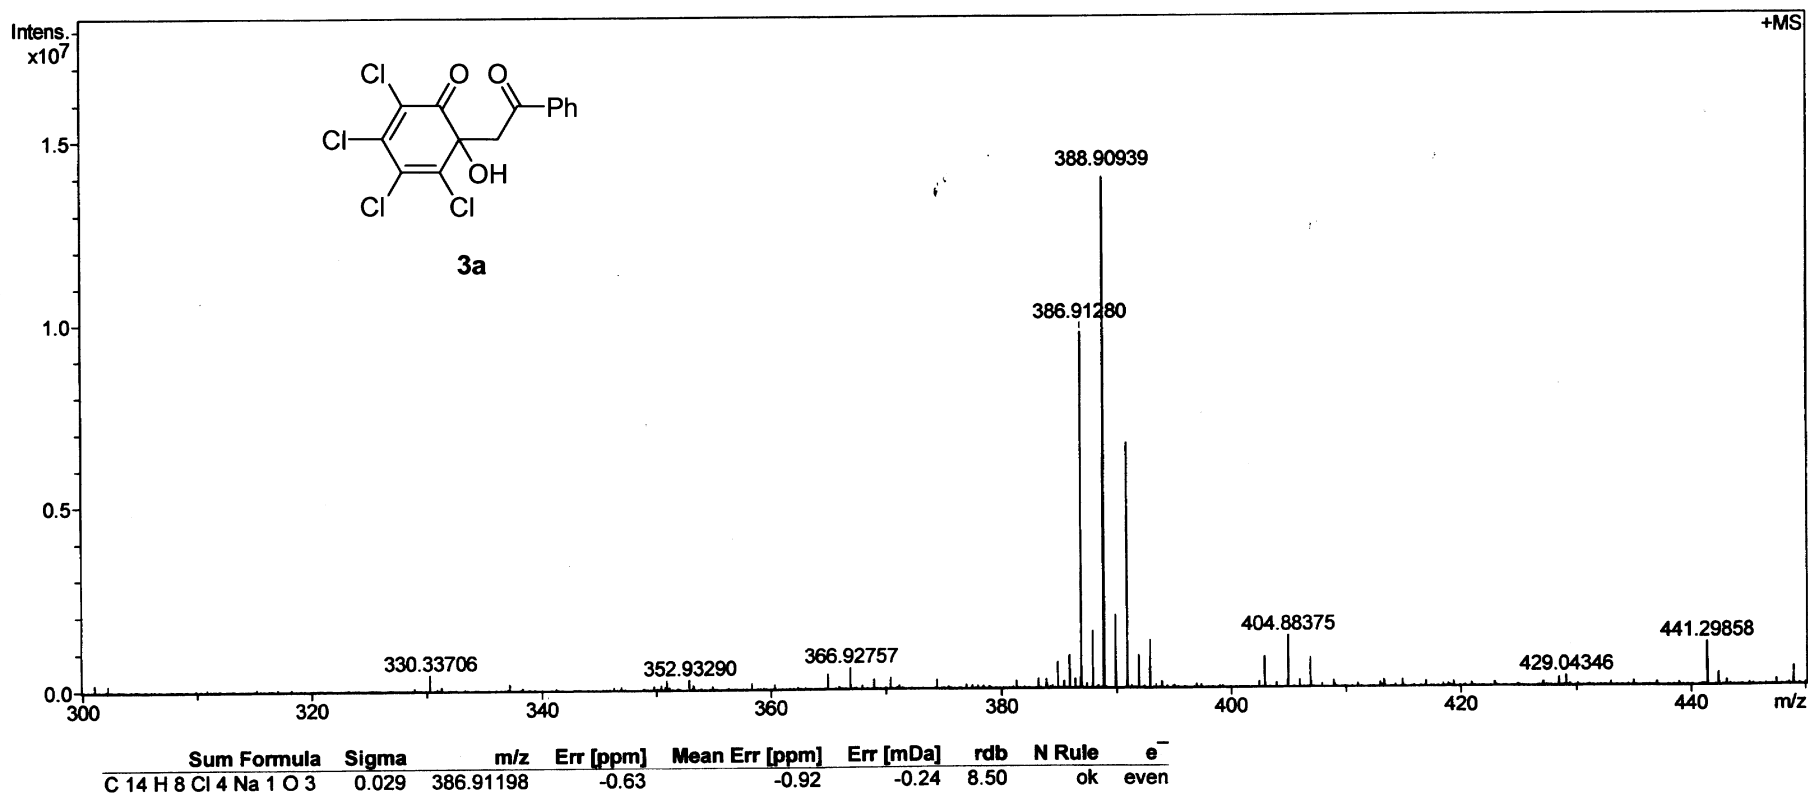

57

File Name : j:\maspec2\data\81444.ms2  
Creation Date/Time : 08-12-10 at 17:50:00  
File Type : Lo-Res Data - Raw (Magnet)  
File Source : Acquired on MASPEC II system [msw/9888]  
Operator : Peking University  
Instrument : ZAB-HS

SCAN GRAPH. Flagging=Nom.M/z. Ctd=[Thr:1000, Min.Hgt:1000, Min.Wid(Mit):10(7), Inc:10%, Res:10%].  
Scan 17#1:34. Sub.=2#0:10. "1". Entries=531. Base M/z=105.2. 100% Int.=10.26576. EI. POS. Saturated.

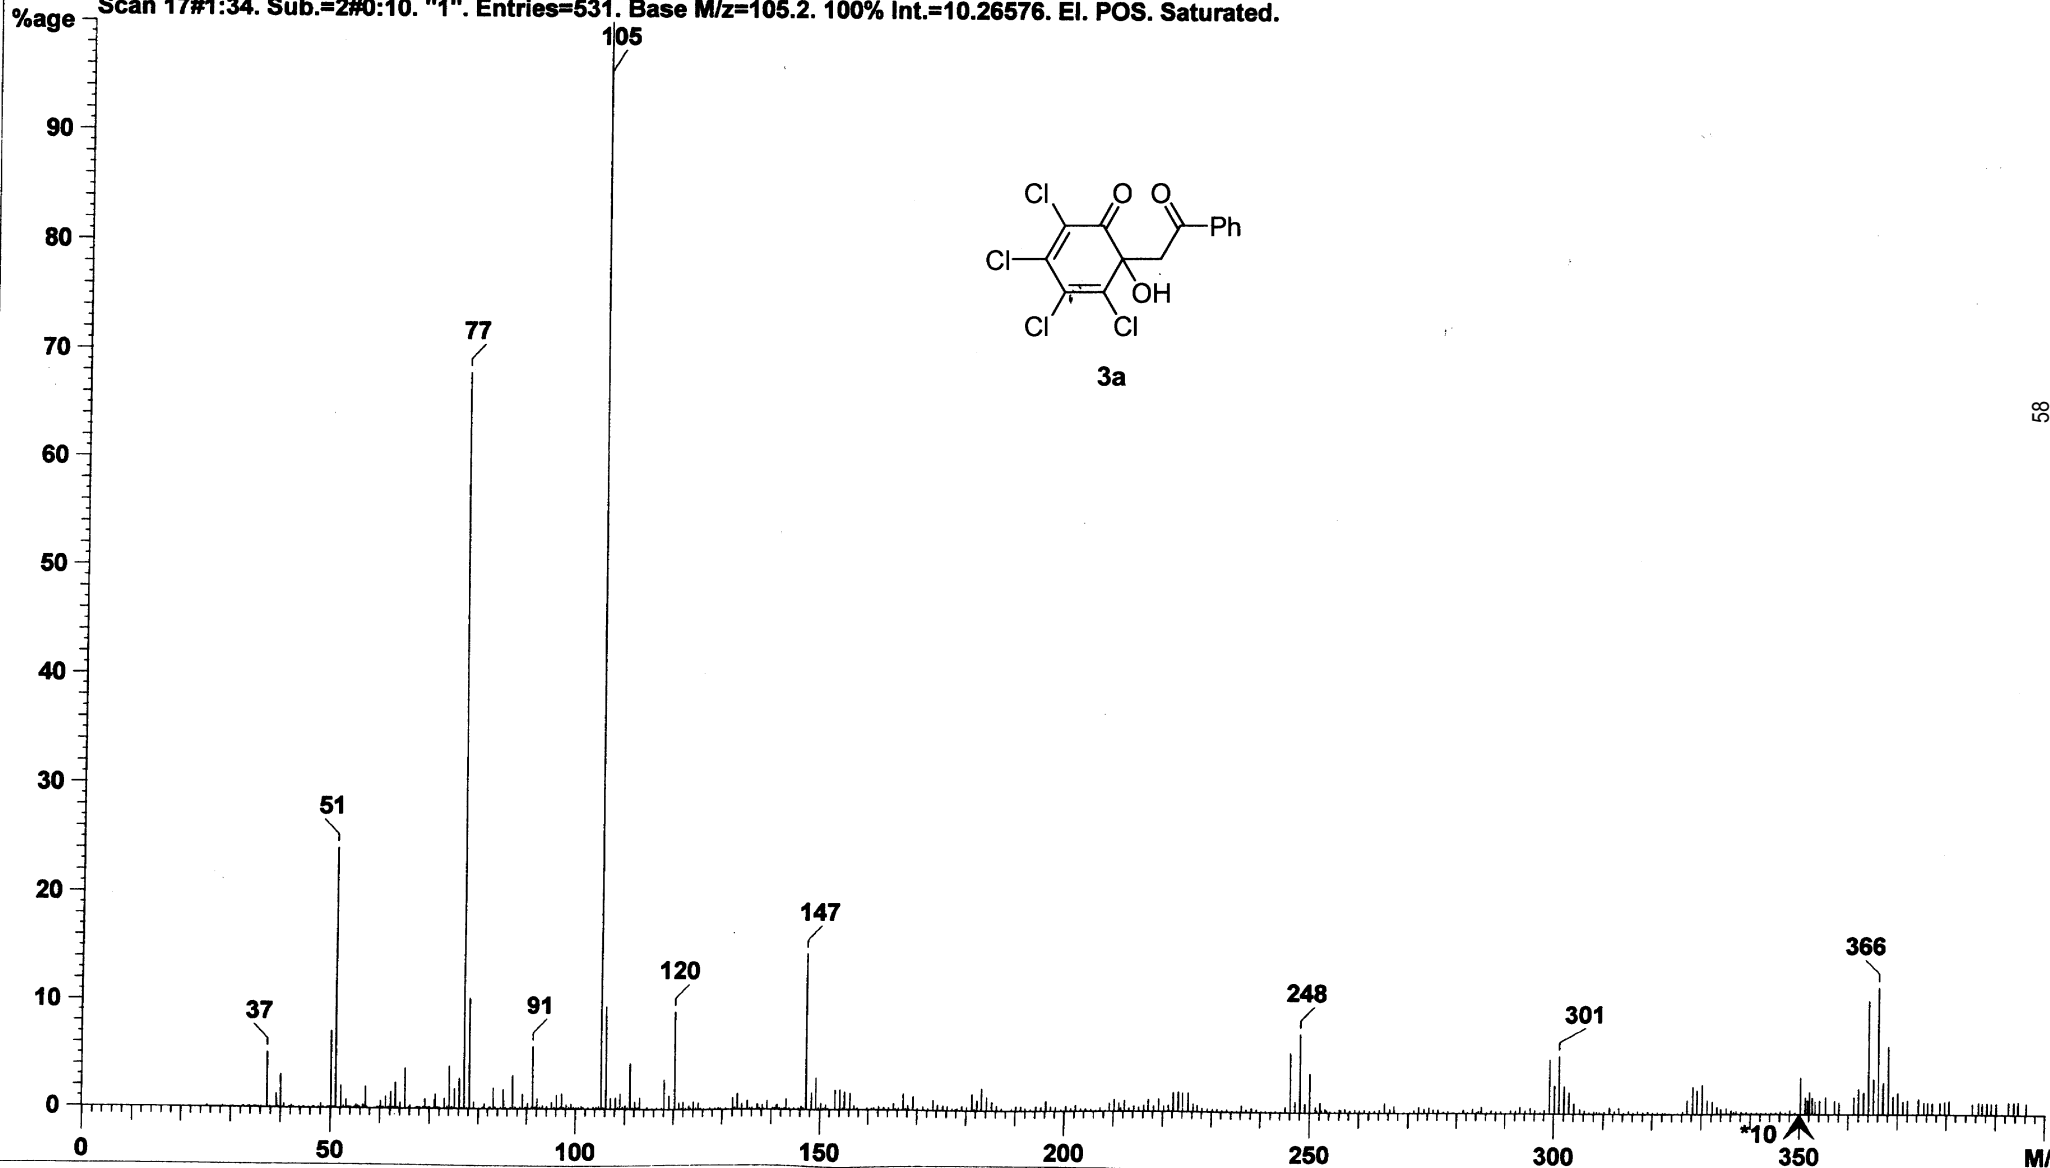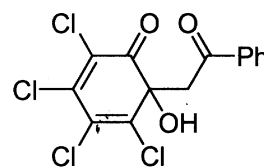

3a

File Name : j:\maspec2\data\81466.ms2  
Creation Date/Time : 08-12-15 at 8:38:03  
File Type : Lo-Res Data - Raw (Magnet)  
File Source : Acquired on MASPEC II system [msw/9888]  
Operator : Peking University  
Instrument : ZAB-HS

SCAN GRAPH. Flagging=Nom.M/z. Ctd=[Thr:1000, Min.Hgt:1000, Min.Wid(Mlt):10(7), Inc:10%, Res:10%].  
Scan 24#2:06. Sub.=1#0:04. "2". Entries=446. Base M/z=135.1. 100% Int.=1.67513. EI. POS.

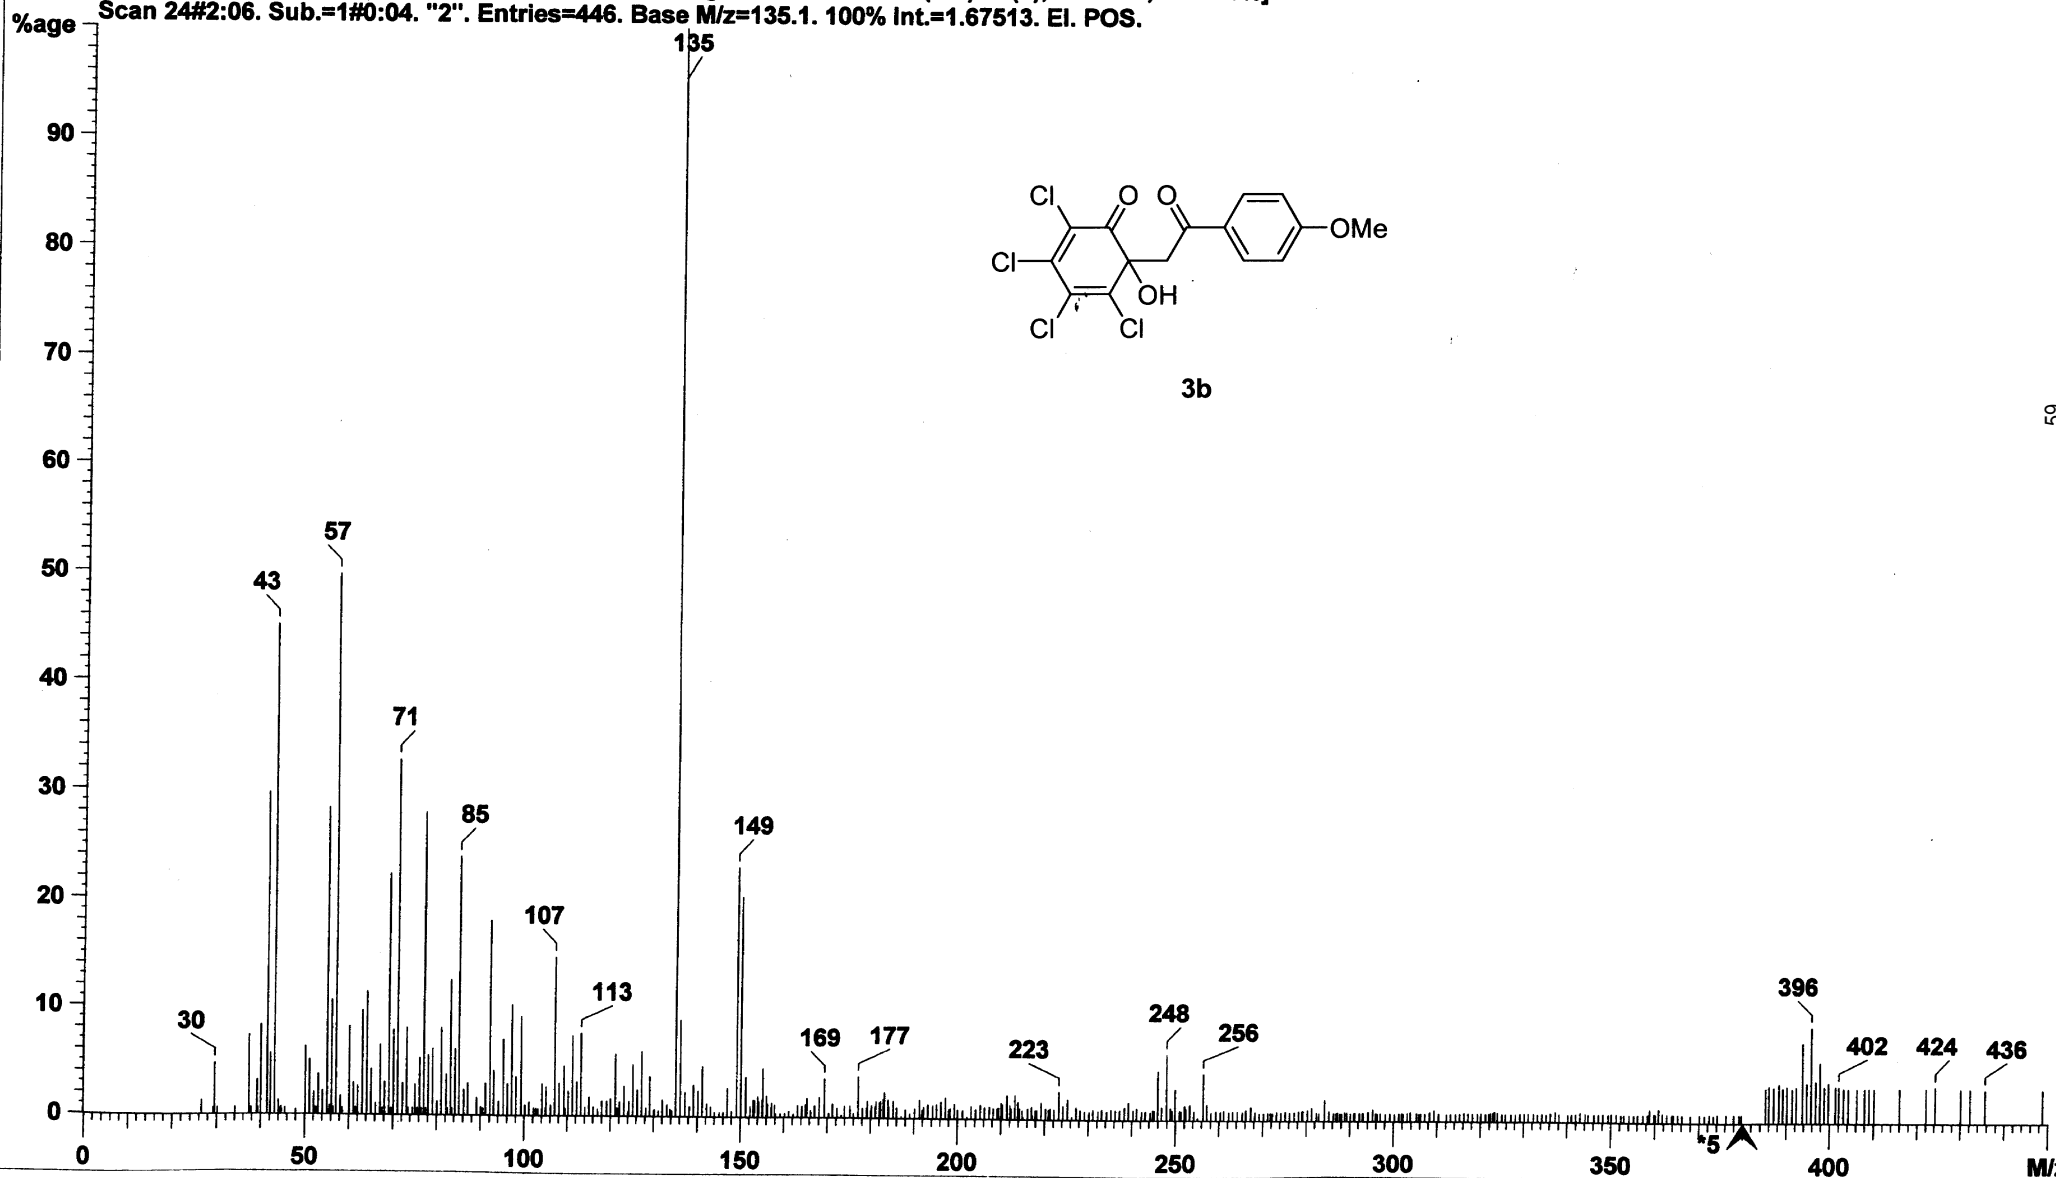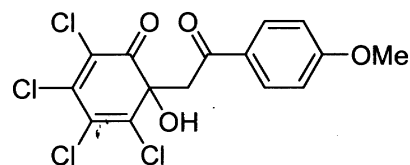

3b

# Peking University Mass Spectrometry Sample Analysis Report

## Analysis Info

**Analysis Name** 81347\_20081209\_000001.d  
**Sample** 5  
**Comment** ESI Positive

**Acquisition Date** 12/9/2008 4:04:45 PM  
**Instrument** Bruker Apex IV FTMS  
**Operator** Peking University

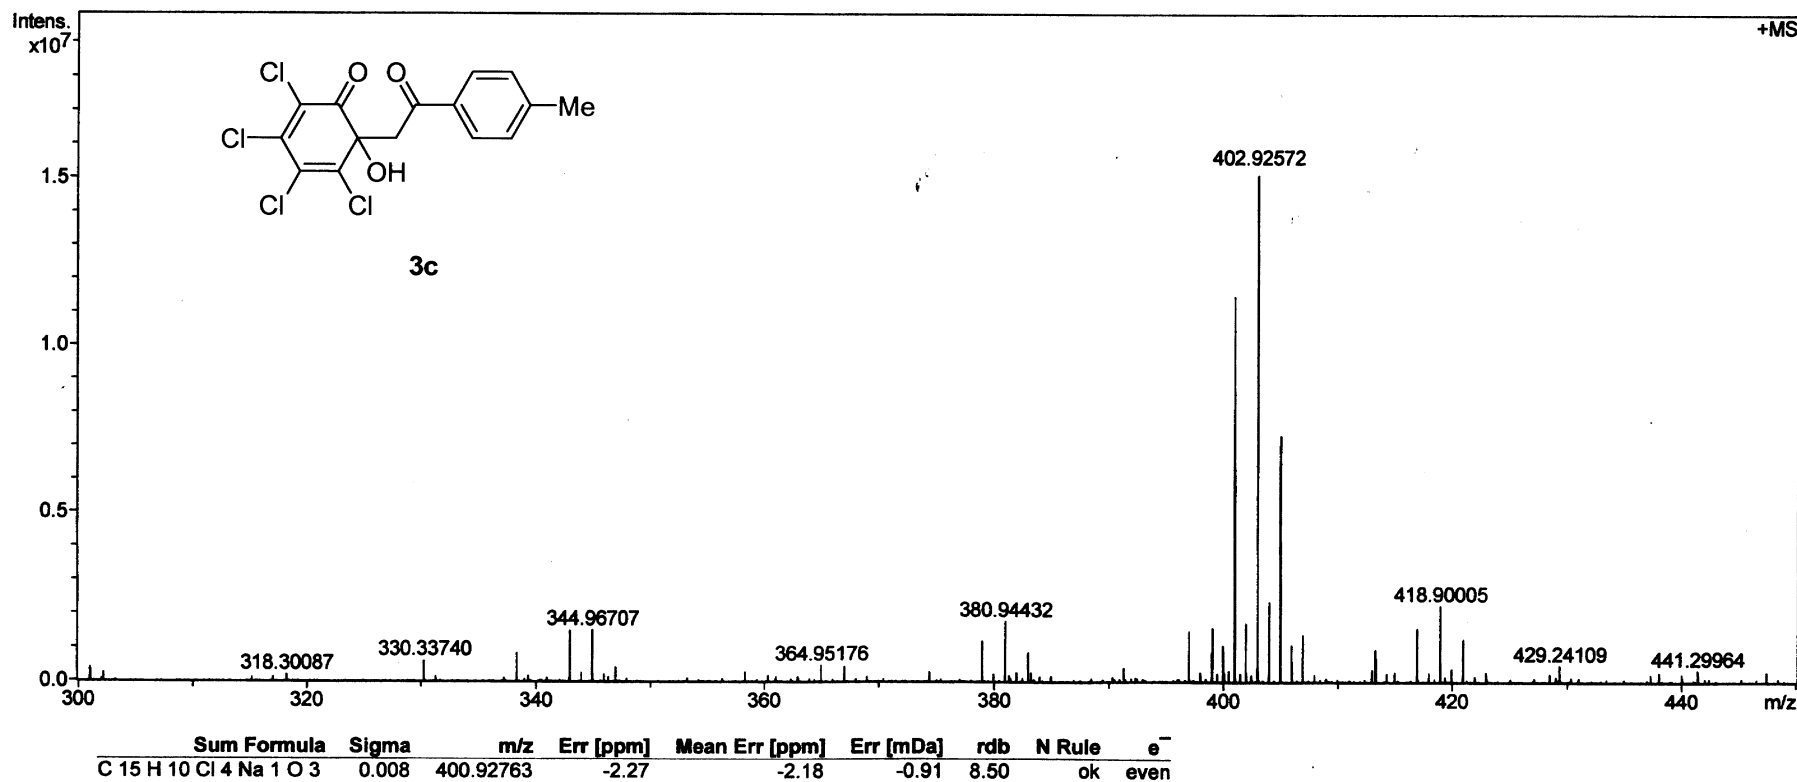

60

File Name : j:\maspec2\data\81446.ms2  
Creation Date/Time : 08-12-10 at 18:06:37  
File Type : Lo-Res Data - Raw (Magnet)  
File Source : Acquired on MASPEC II system [msw/9888]  
Operator : Peking University  
Instrument : ZAB-HS

SCAN GRAPH. Flagging=Nom.M/z. Ctd=[Thr:1000, Min.Hgt:1000, Min.Wid(Mlt):10(7), Inc:10%, Res:10%].  
Scan 25#2:11. Sub.=2#0:10. "5". Entries=614. Base M/z=119.3. 100% Int.=4.49424. EI. POS.

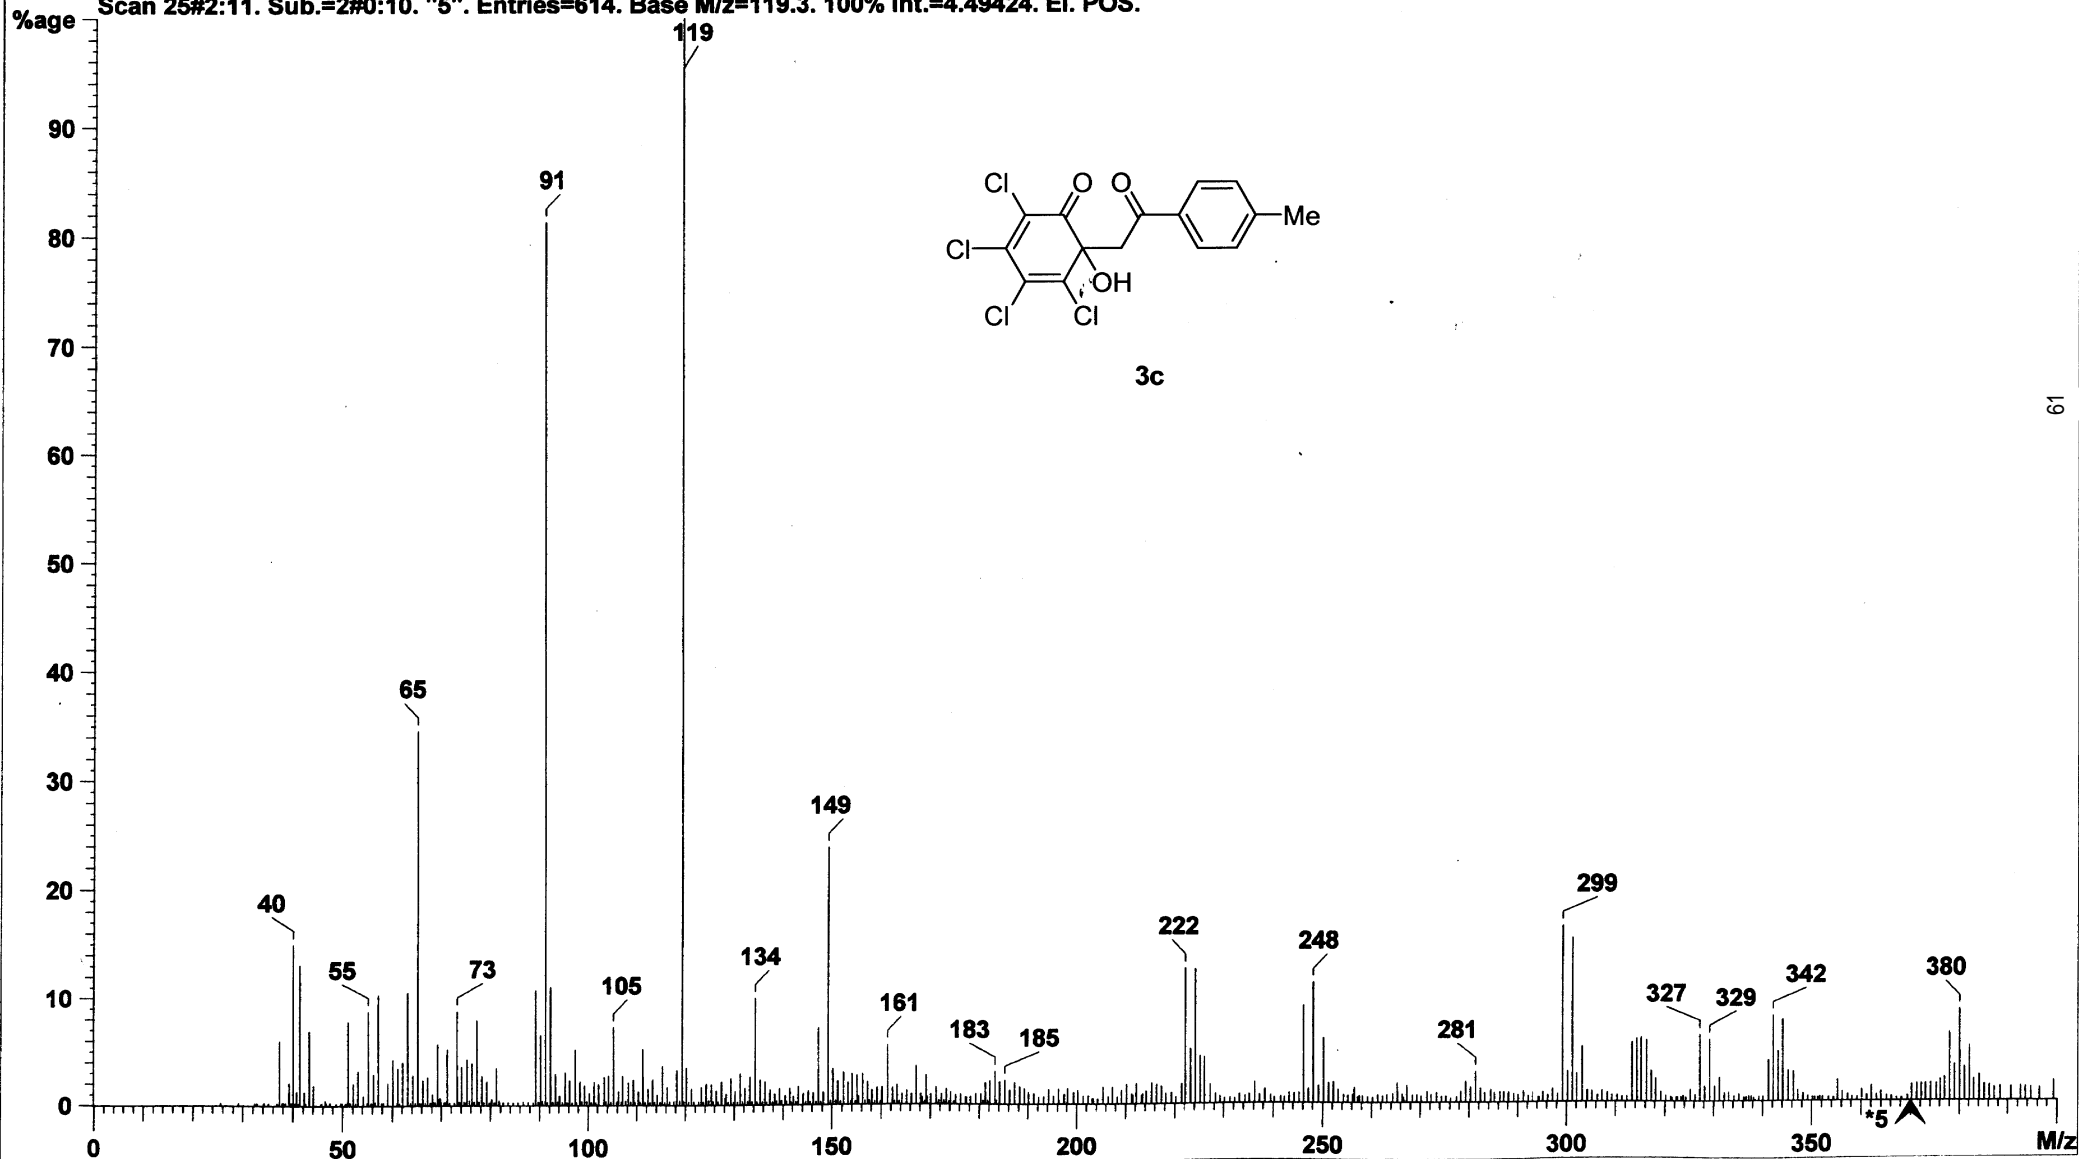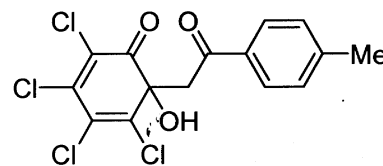

3c

# Peking University Mass Spectrometry Sample Analysis Report

## Analysis Info

**Analysis Name** 81348\_20081209\_000001.d  
**Sample** 6  
**Comment** ESI Positive

**Acquisition Date** 12/9/2008 4:07:01 PM  
**Instrument** Bruker Apex IV FTMS  
**Operator** Peking University

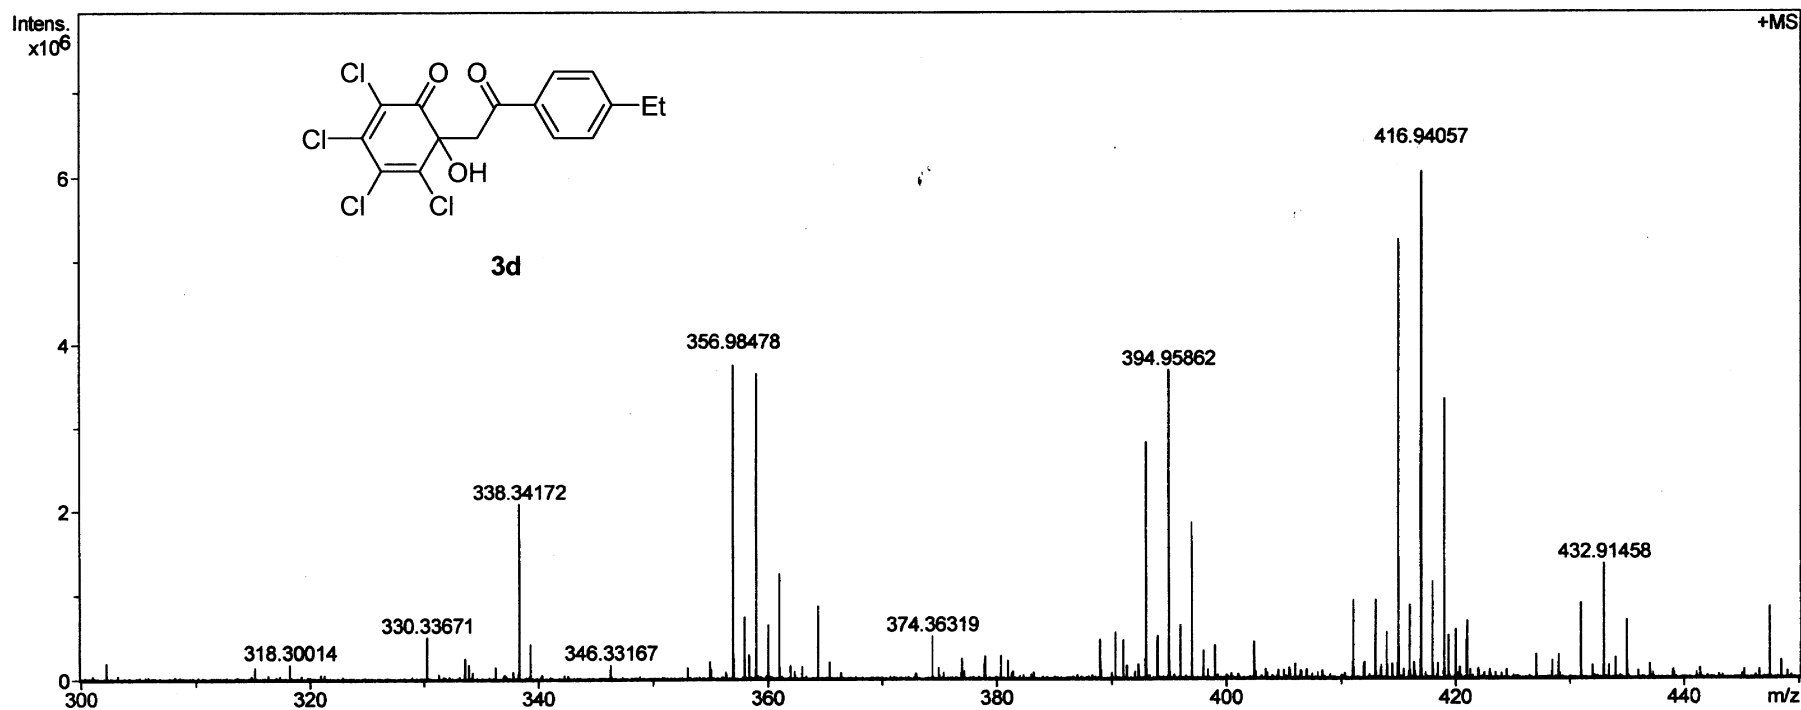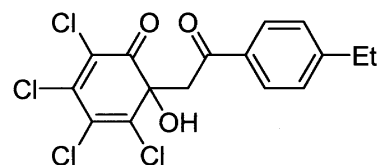

**3d**

| Sum                     | Formula | Sigma | m/z       | Err [ppm] | Mean Err [ppm] | Err [mDa] | rdb  | N Rule | e <sup>-</sup> |
|-------------------------|---------|-------|-----------|-----------|----------------|-----------|------|--------|----------------|
| C 16 H 12 Cl 4 Na 1 O 3 |         | 0.029 | 414.94328 | -0.24     | -0.18          | -0.10     | 8.50 | ok     | even           |

File Name : j:\maspec2\data\81447.ms2  
Creation Date/Time : 08-12-10 at 18:14:43  
File Type : Lo-Res Data - Raw (Magnet)  
File Source : Acquired on MASPEC II system [msw/9888]  
Operator : Peking University  
Instrument : ZAB-HS

SCAN GRAPH. Flagging=Nom.M/z. Ctd=[Thr:1000, Min.Hgt:1000, Min.Wid(Mit):10(7), Inc:10%, Res:10%].  
Scan 22#1:55. Sub.=2#0:10. "6". Entries=539. Base M/z=133.3. 100% Int.=5.41824. EI. POS.

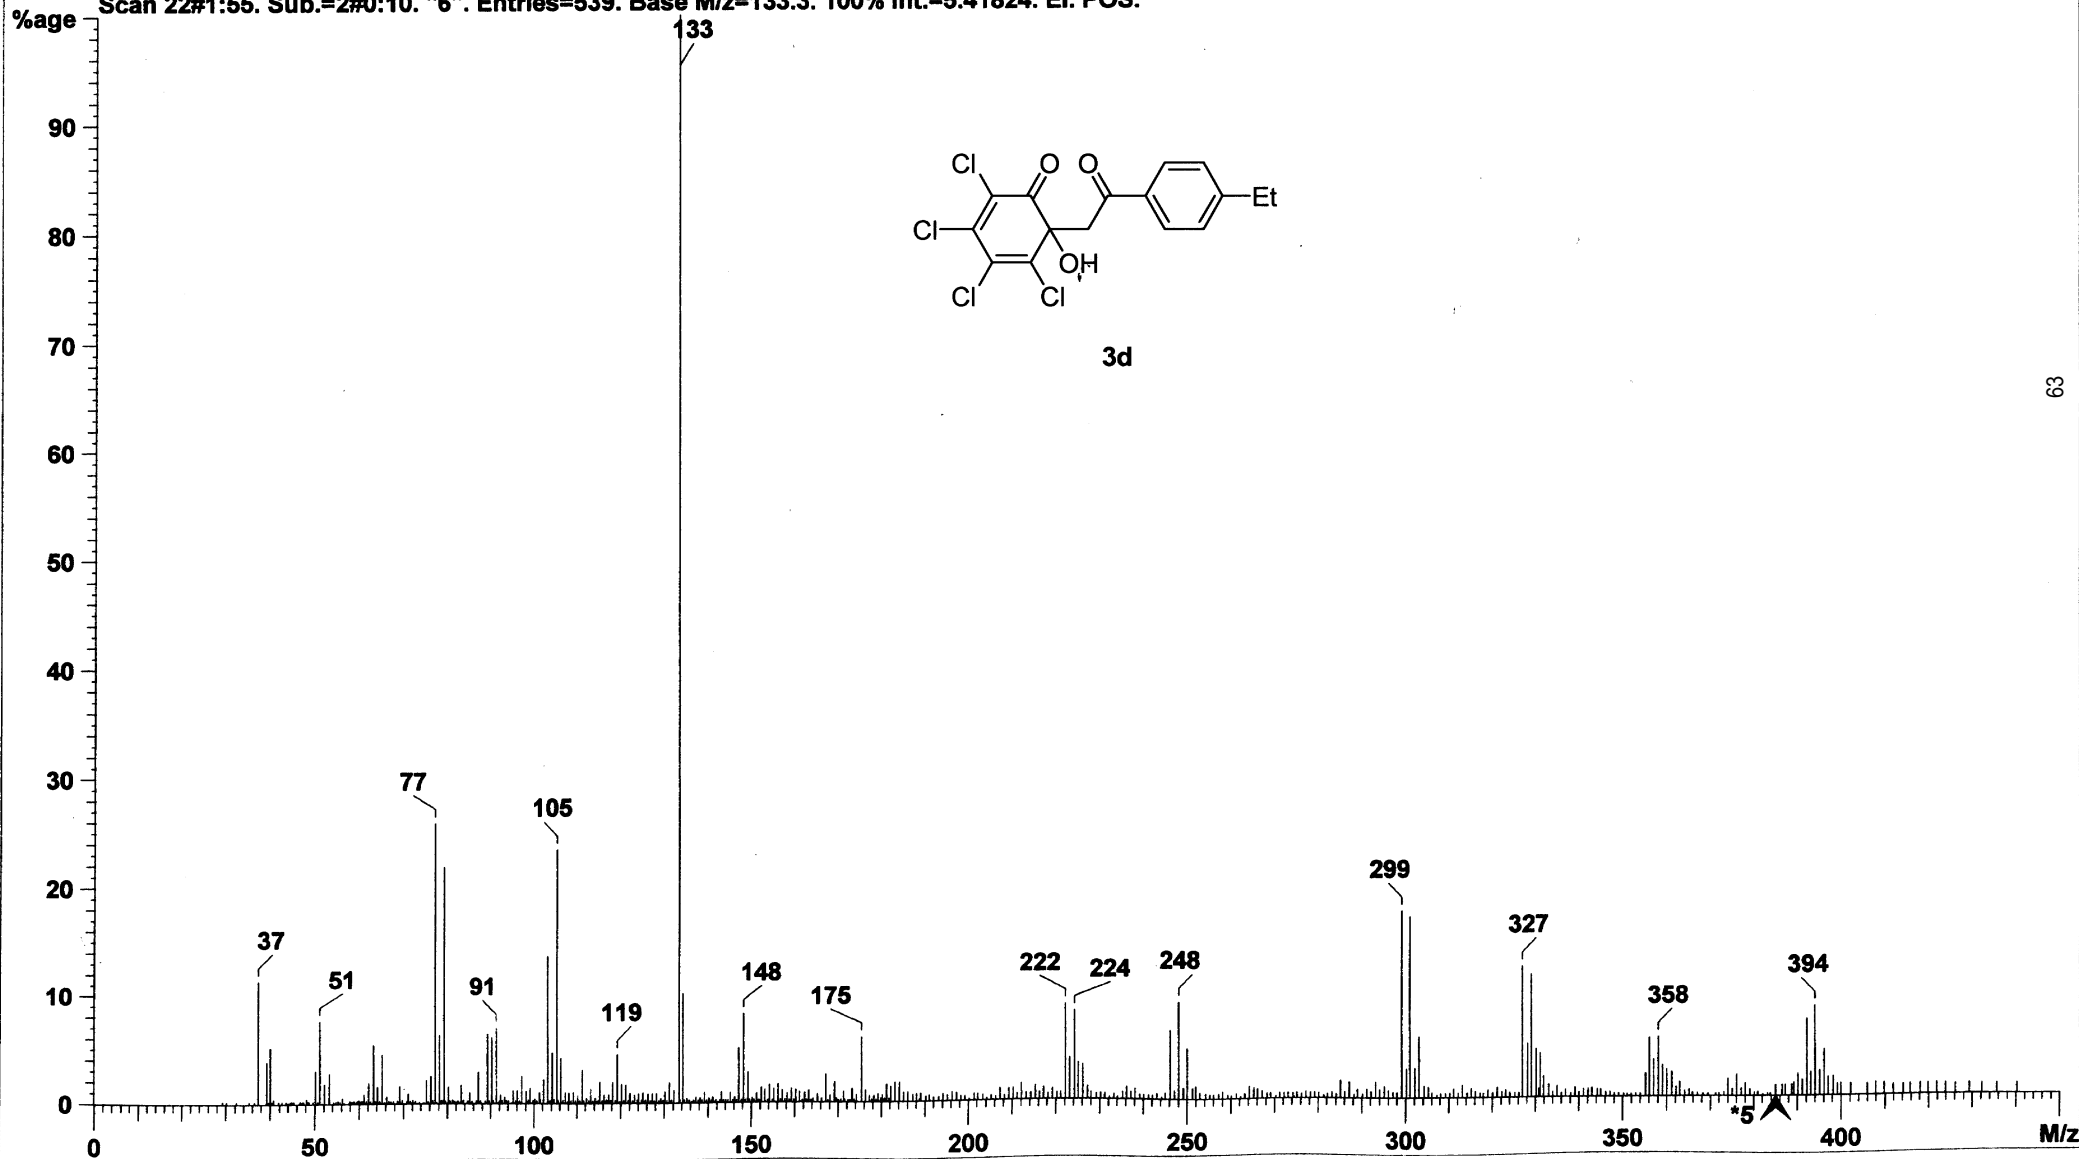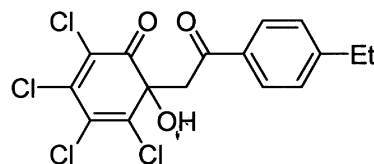

3d

# Peking University Mass Spectrometry Sample Analysis Report

**Analysis Info**

**Analysis Name** 81367\_20081210\_000001.d  
**Sample** 3  
**Comment** ESI Positive

**Acquisition Date** 12/10/2008 3:33:10 PM  
**Instrument** Bruker Apex IV FTMS  
**Operator** Peking University

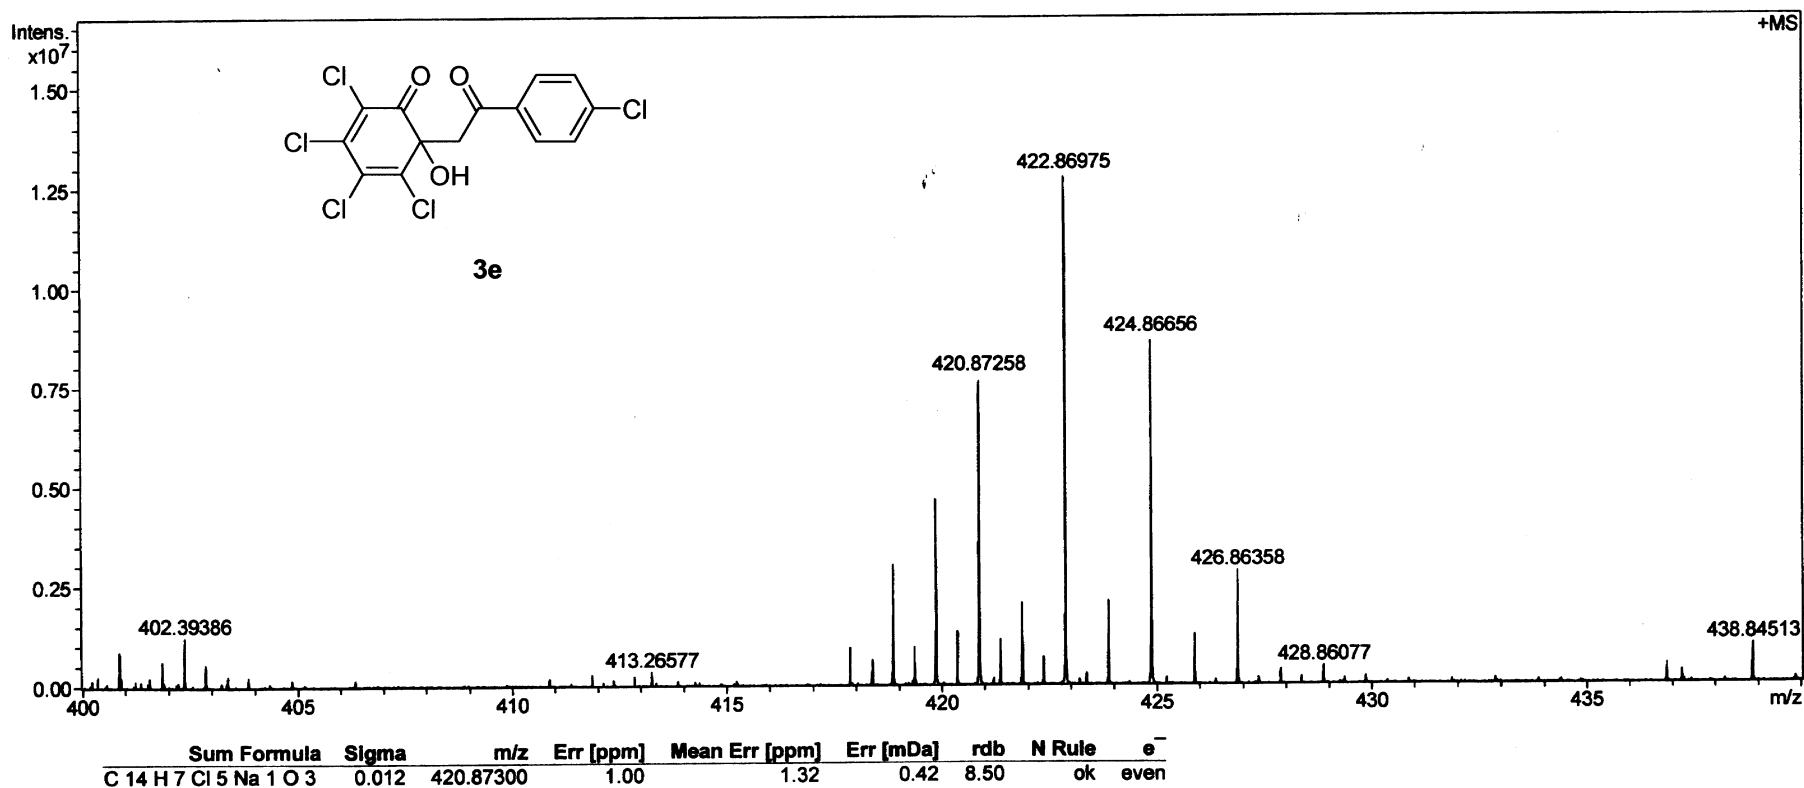

64



File Name : j:\maspec2\data\81453.ms2  
Creation Date/Time : 08-12-12 at 8:35:17  
File Type : Lo-Res Data - Raw (Magnet)  
File Source : Acquired on MASPEC II system [msw/9888]  
Operator : Peking University  
Instrument : ZAB-HS

SCAN GRAPH. Flagging=Nom.M/z. Ctd=[Thr:1000, Min.Hgt:1000, Min.Wid(Mlt):10(7), Inc:10%, Res:10%].  
Scan 22#1:55. Sub.=4#0:20. "3". Entries=327. Base M/z=139.1. 100% Int.=2.46784. EI. POS.

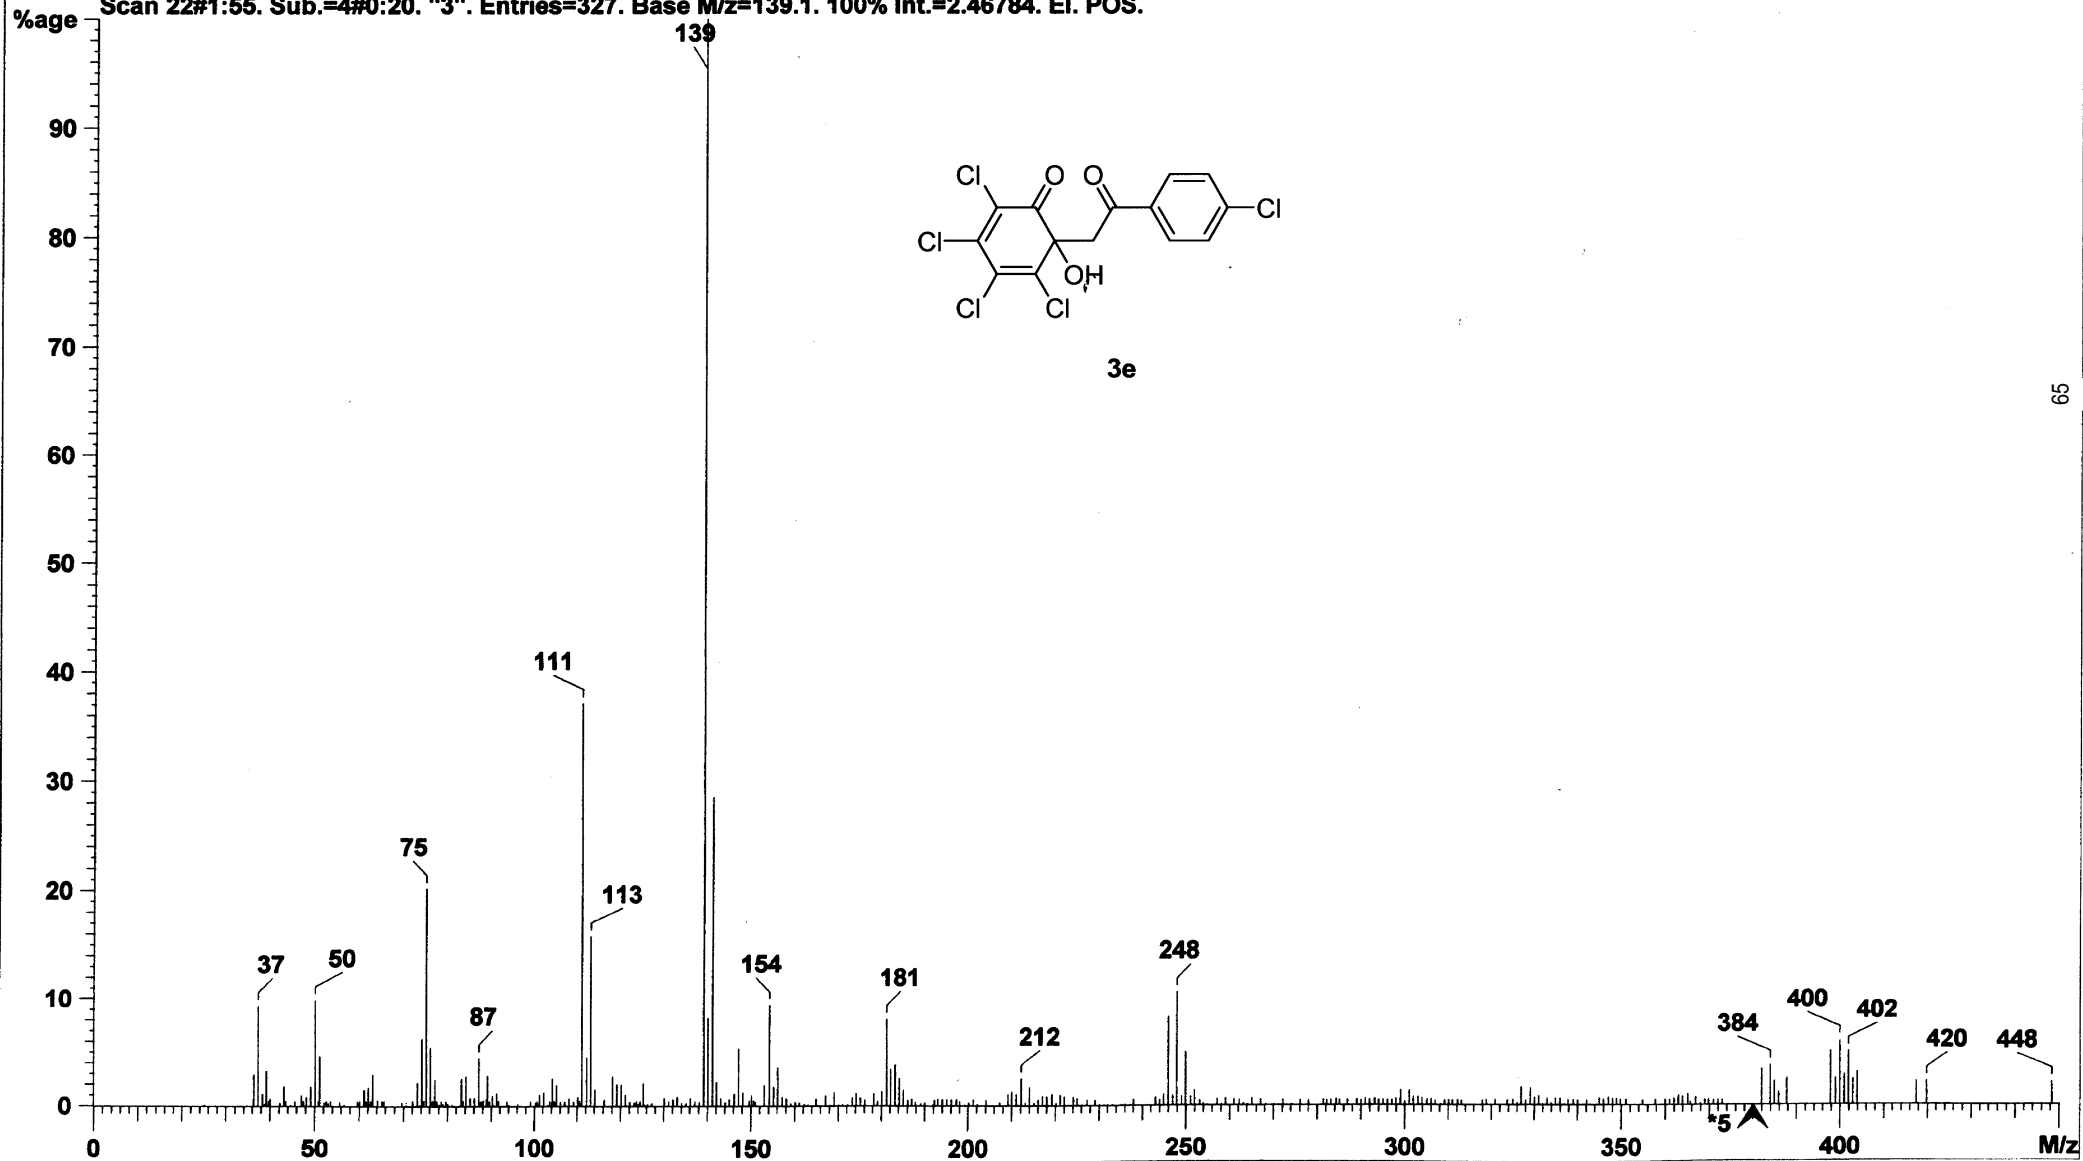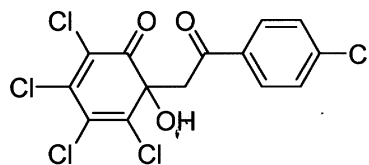

3e

# Peking University Mass Spectrometry Sample Analysis Report

## Analysis Info

Analysis Name 81426\_20081216\_000001.d  
 Sample 4  
 Comment ESI Positive

Acquisition Date 12/16/2008 4:44:23 PM  
 Instrument Bruker Apex IV FTMS  
 Operator Peking University

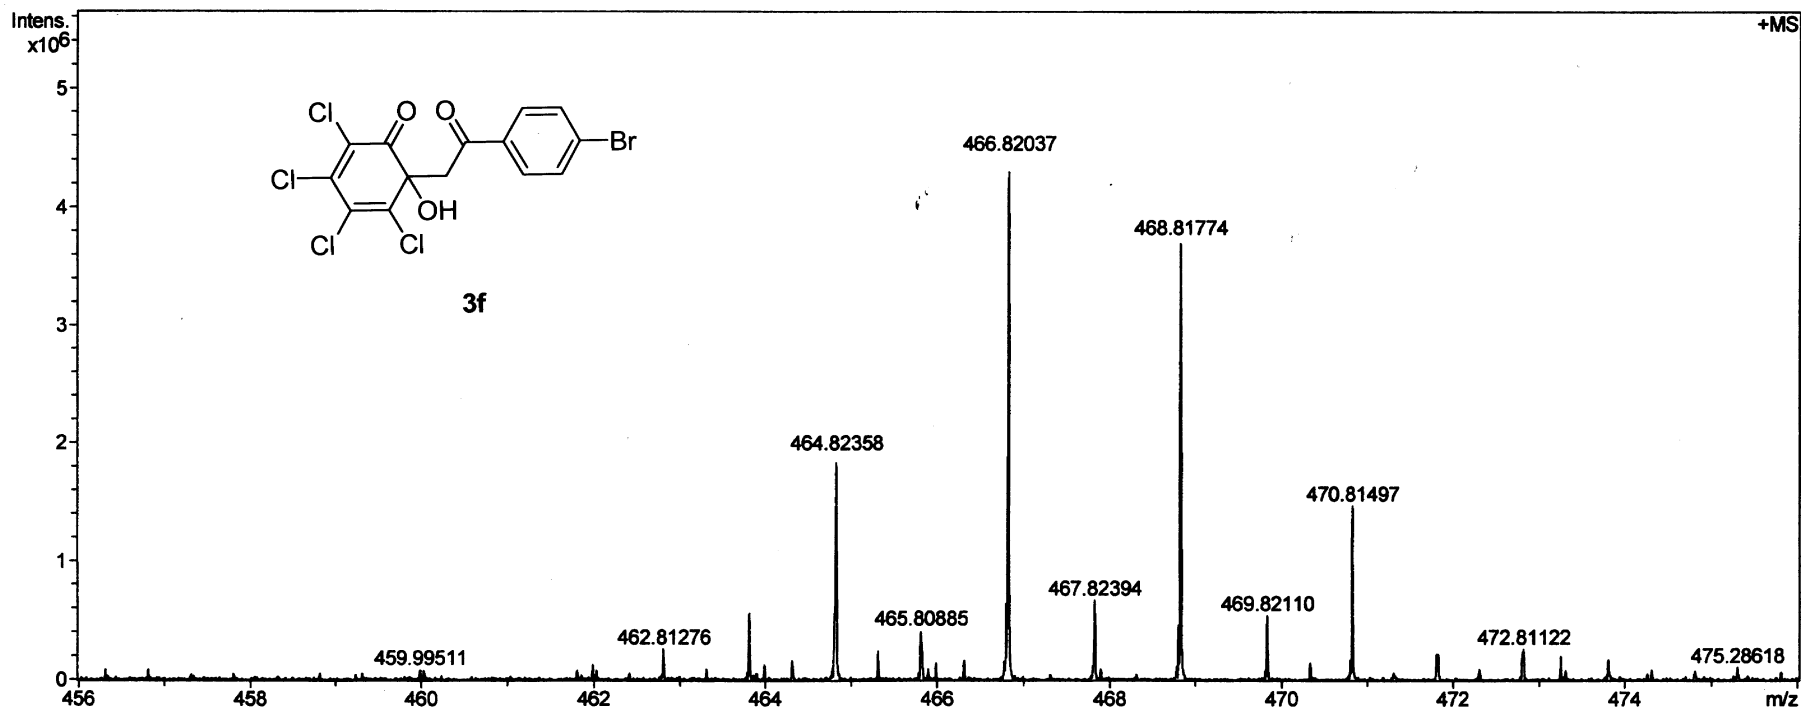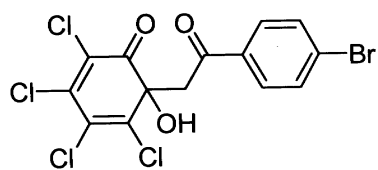

| Sum                         | Formula | Sigma | m/z       | Err [ppm] | Mean Err [ppm] | Err [mDa] | rdb   | N Rule | e <sup>-</sup> |
|-----------------------------|---------|-------|-----------|-----------|----------------|-----------|-------|--------|----------------|
| C 14 H 7 Br 1 Cl 4 Na 1 O 3 |         | 0.011 | 464.82249 | -2.36     | 0.18           | -1.09     | 8.50  | ok     | even           |
| C 16 H 6 Br 1 Cl 4 O 3      |         | 0.027 | 464.82489 | 2.82      | 4.22           | 1.31      | 11.50 | ok     | even           |

File Name : j:\maspec2\data\81478.ms2  
Creation Date/Time : 08-12-17 at 9:44:24  
File Type : Lo-Res Data - Raw (Magnet)  
File Source : Acquired on MASPEC II system [msw/9888].  
Operator : Peking University  
Instrument : ZAB-HS

SCAN GRAPH. Flagging=Nom.M/z. Ctd=[Thr:1000, Min.Hgt:1000, Min.Wid(Mlt):10(7), Inc:10%, Res:10%].  
Scan 22#1:55. Sub.=5#0:25. "4". Entries=624. Base M/z=185. 100% Int.=10.47031. EI. POS. Saturated.

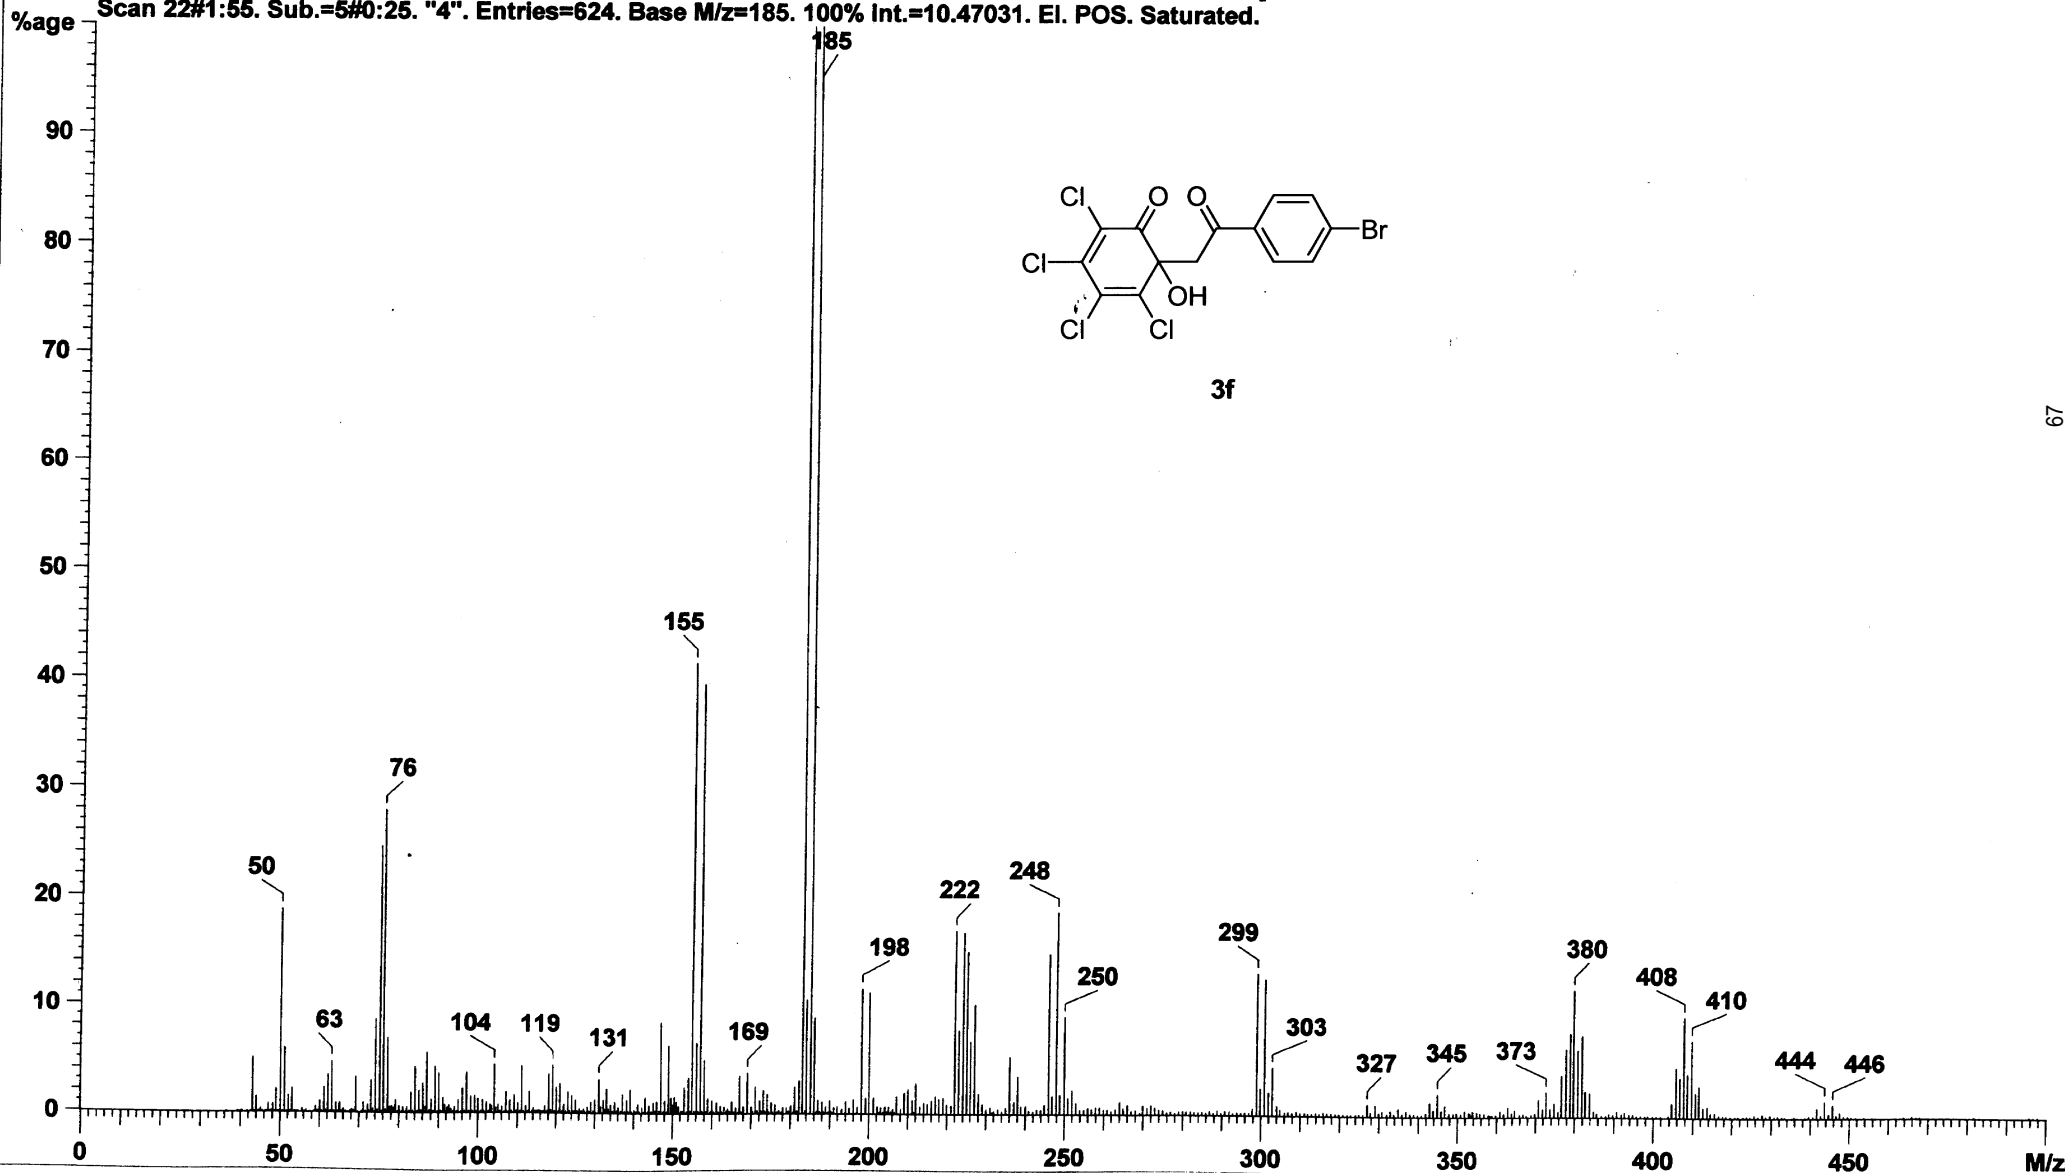

# Peking University Mass Spectrometry Sample Analysis Report

## Analysis Info

Analysis Name 81428\_20081216\_000001.d  
Sample 18  
Comment ESI Positive

Acquisition Date 12/16/2008 4:54:41 PM  
Instrument Bruker Apex IV FTMS  
Operator Peking University

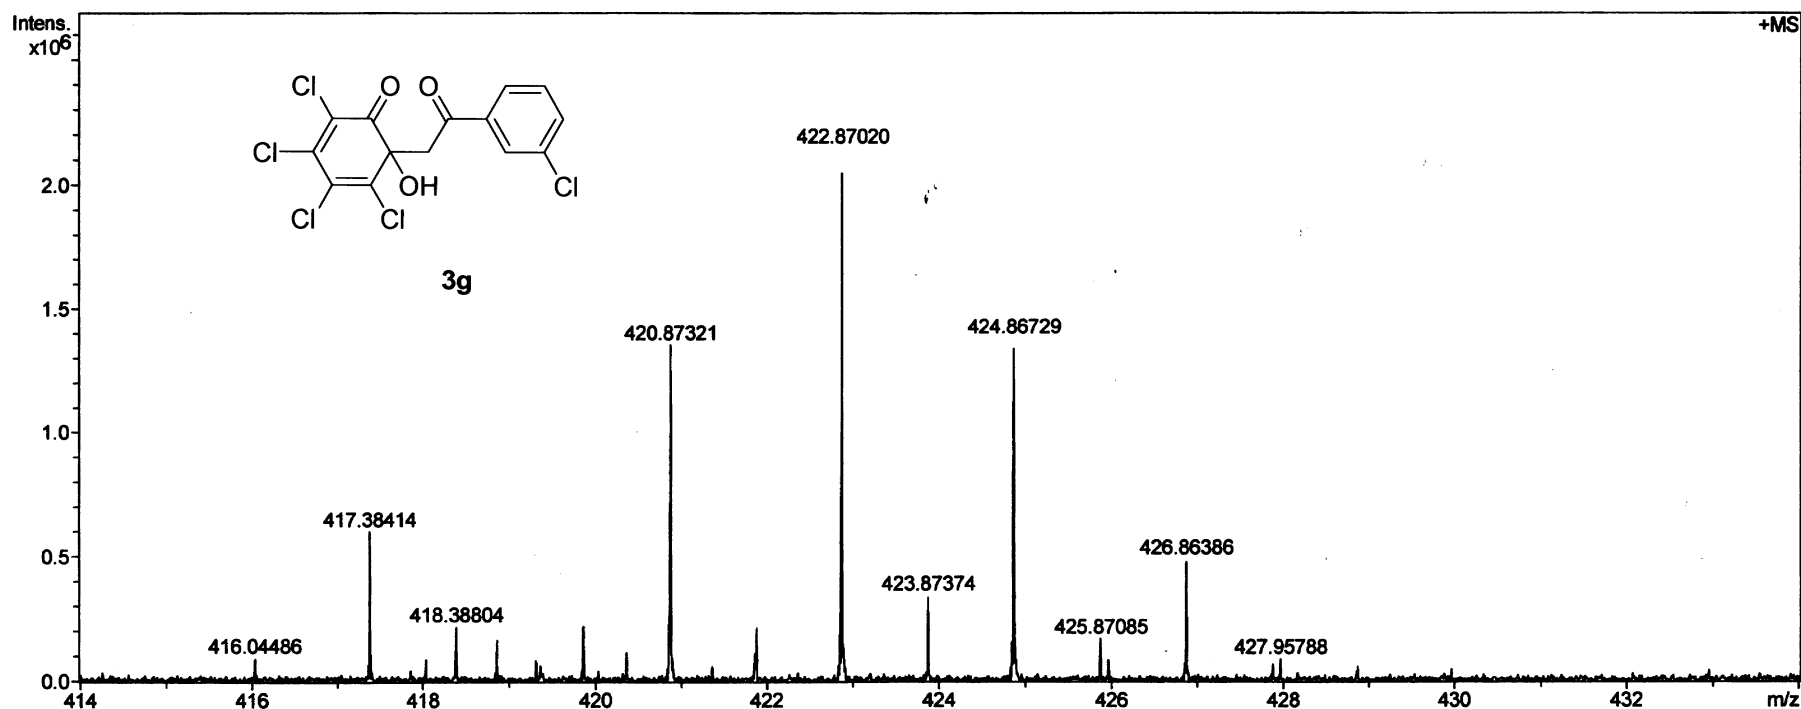

| Sum Formula            | Sigma | m/z       | Err [ppm] | Mean Err [ppm] | Err [mDa] | rdb  | N Rule | e <sup>-</sup> |
|------------------------|-------|-----------|-----------|----------------|-----------|------|--------|----------------|
| C 14 H 7 Cl 5 Na 1 O 3 | 0.010 | 420.87300 | -0.49     | -0.04          | -0.21     | 8.50 | ok     | even           |

File Name : j:\maspec2\data\81480.ms2  
Creation Date/Time : 08-12-17 at 12:07:30  
File Type : Lo-Res Data - Raw (Magnet)  
File Source : Acquired on MASPEC II system [msw/9888]  
Operator : Peking University  
Instrument : ZAB-HS

SCAN GRAPH. Flagging=Nom.M/z. Ctd=[Thr:1000, Min.Hgt:1000, Min.Wid(Mlt):10(7), Inc:10%, Res:10%].  
Scan 17#1:29. Sub.=7#0:36. "18". Entries=715. Base M/z=139.2. 100% Int.=10.40524. EI. POS. Saturated.

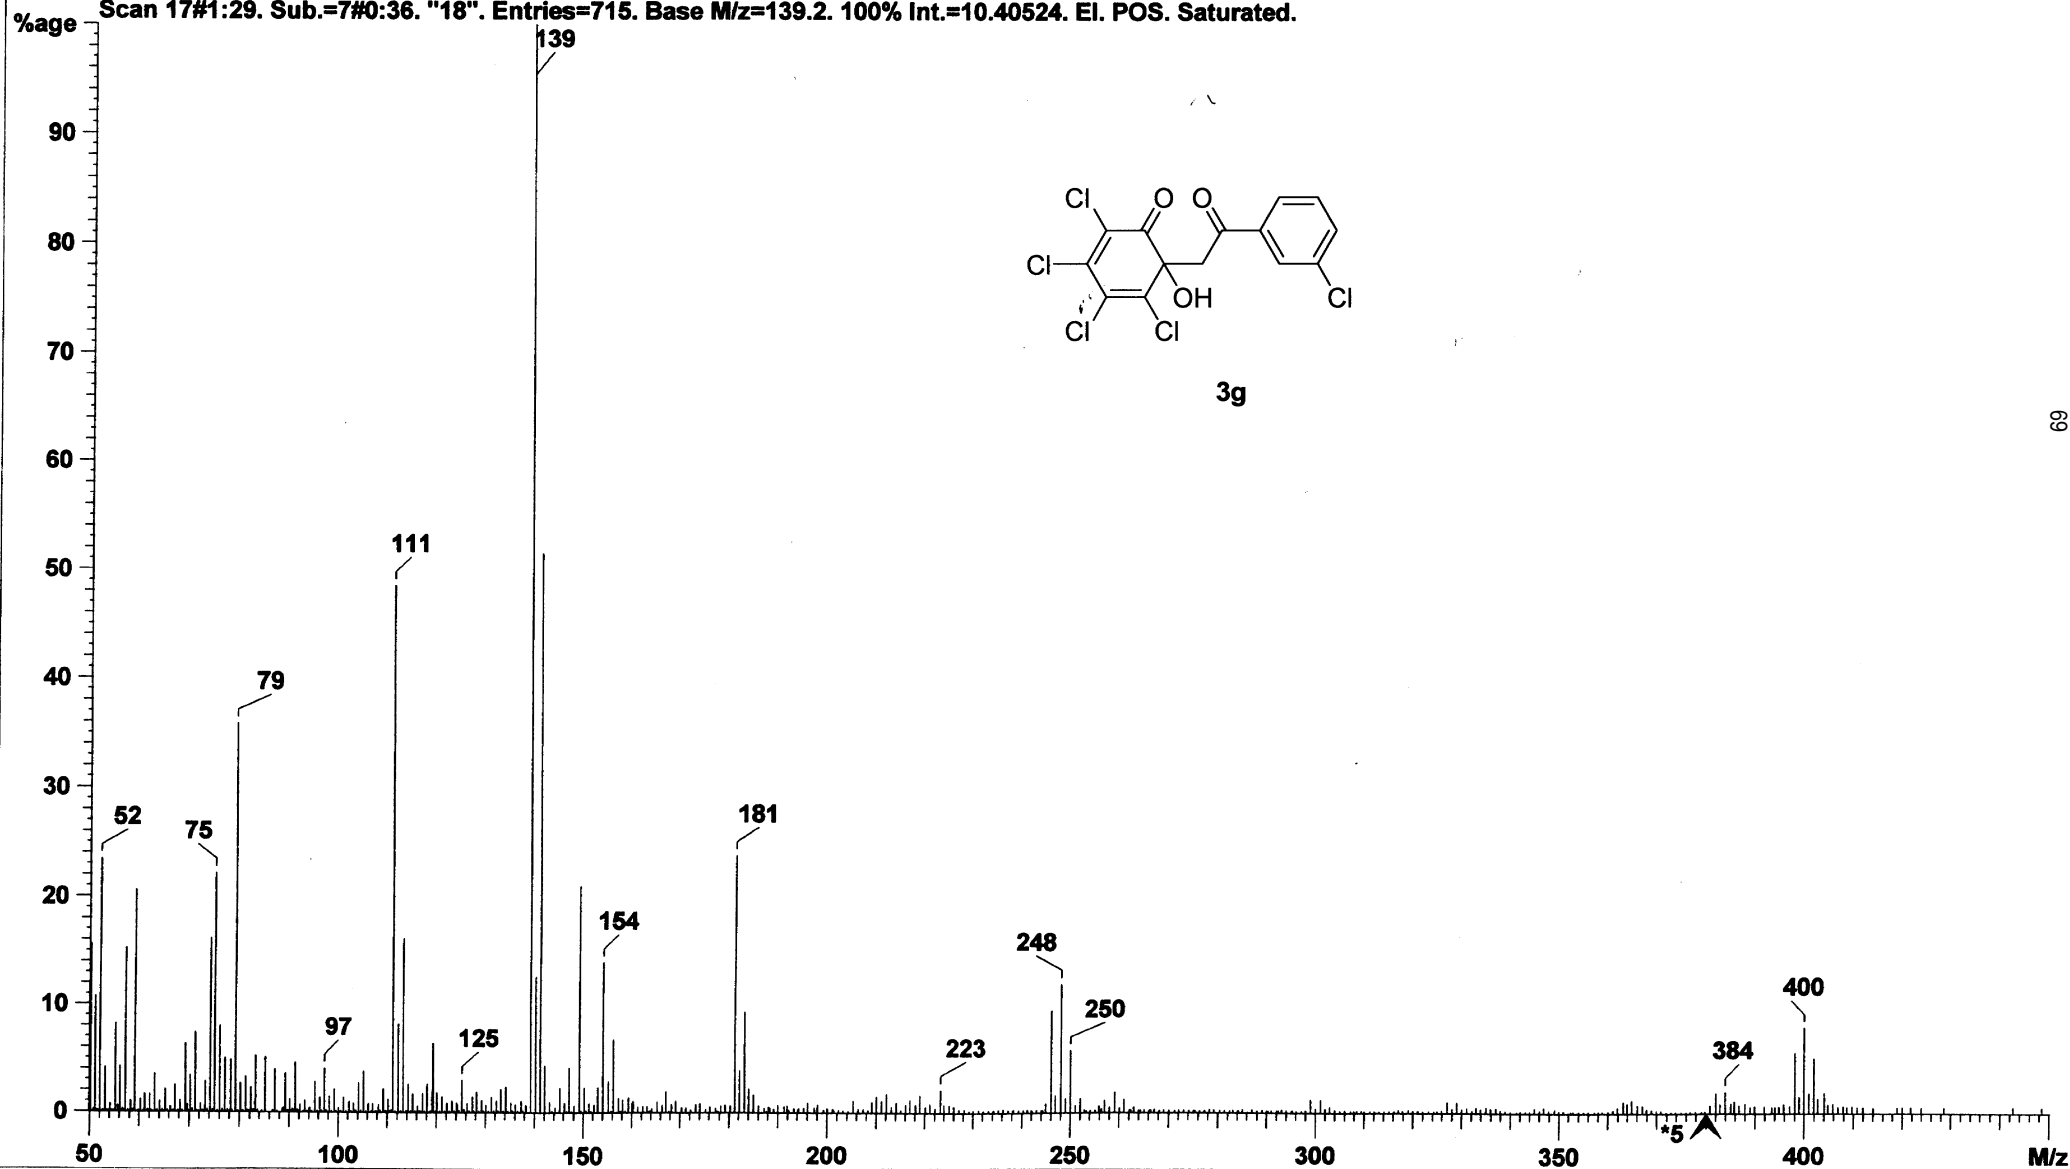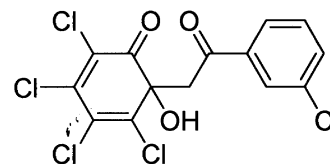

3g

# Peking University Mass Spectrometry Sample Analysis Report

## Analysis Info

Analysis Name 81350\_20081209\_000001.d  
 Sample 8  
 Comment ESI Positive

Acquisition Date 12/9/2008 4:13:51 PM  
 Instrument Bruker Apex IV FTMS  
 Operator Peking University

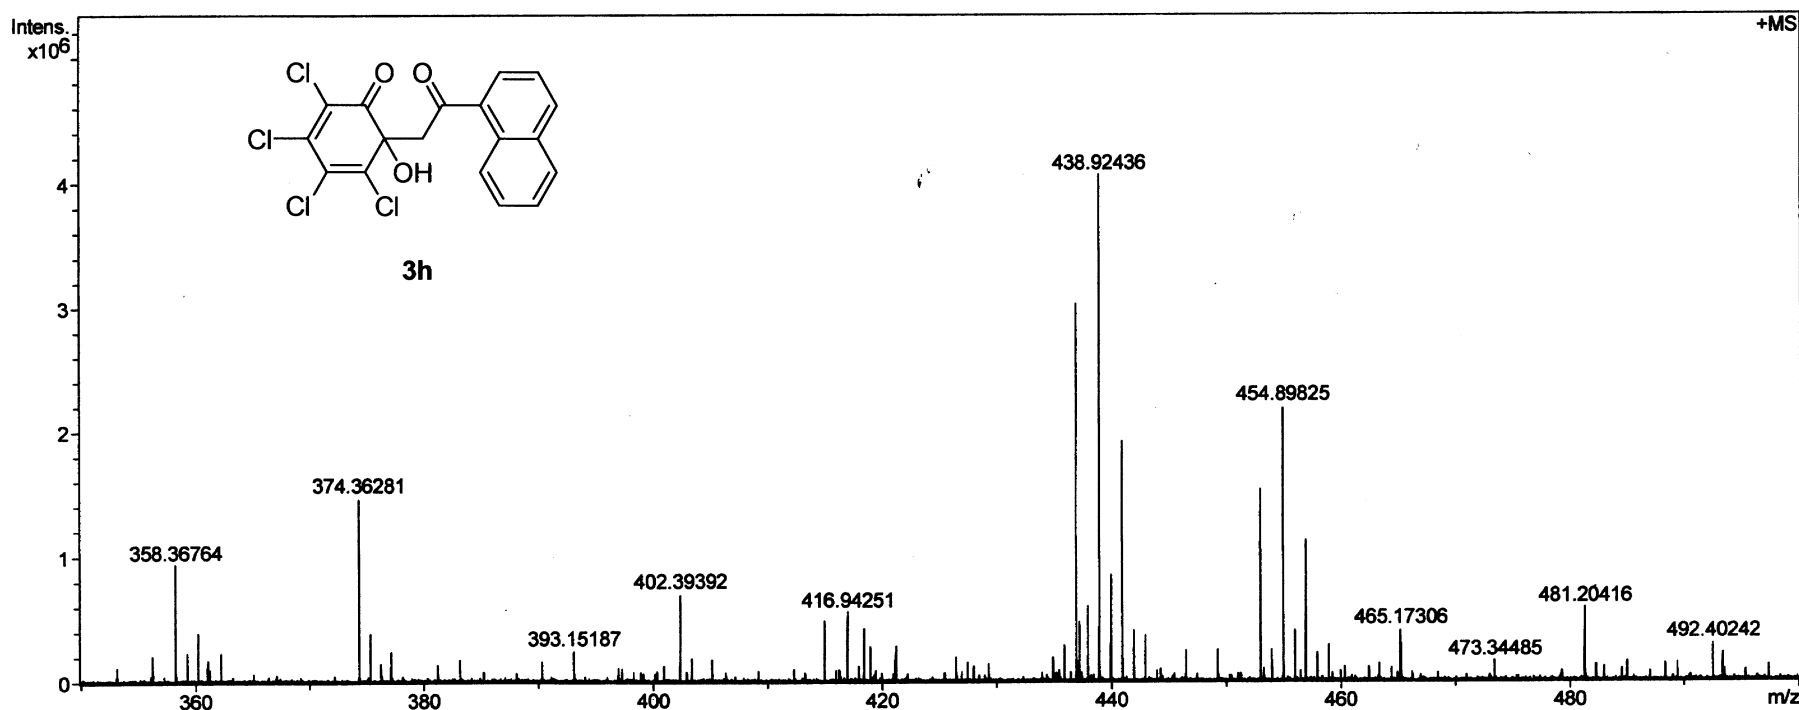

| Sum                     | Formula | Sigma | m/z       | Err [ppm] | Mean Err [ppm] | Err [mDa] | rdb   | N Rule | e <sup>-</sup> |
|-------------------------|---------|-------|-----------|-----------|----------------|-----------|-------|--------|----------------|
| C 18 H 10 Cl 4 Na 1 O 3 |         | 0.011 | 436.92763 | 1.10      | 0.81           | 0.48      | 11.50 | ok     | even           |

File Name : j:\maspec2\data\81449.ms2  
Creation Date/Time : 08-12-10 at 18:29:37  
File Type : Lo-Res Data - Raw (Magnet)  
File Source : Acquired on MASPEC II system [msw/9888]  
Operator : Peking University  
Instrument : ZAB-HS

SCAN GRAPH. Flagging=Nom.M/z. Ctd=[Thr:1000, Min.Hgt:1000, Min.Wid(Mlt):10(7), Inc:10%, Res:10%].  
Scan 30#2:38. Sub.=10#0:52. "8". Entries=789. Base M/z=155.1. 100% Int.=10.4832. EI. POS. Saturated.

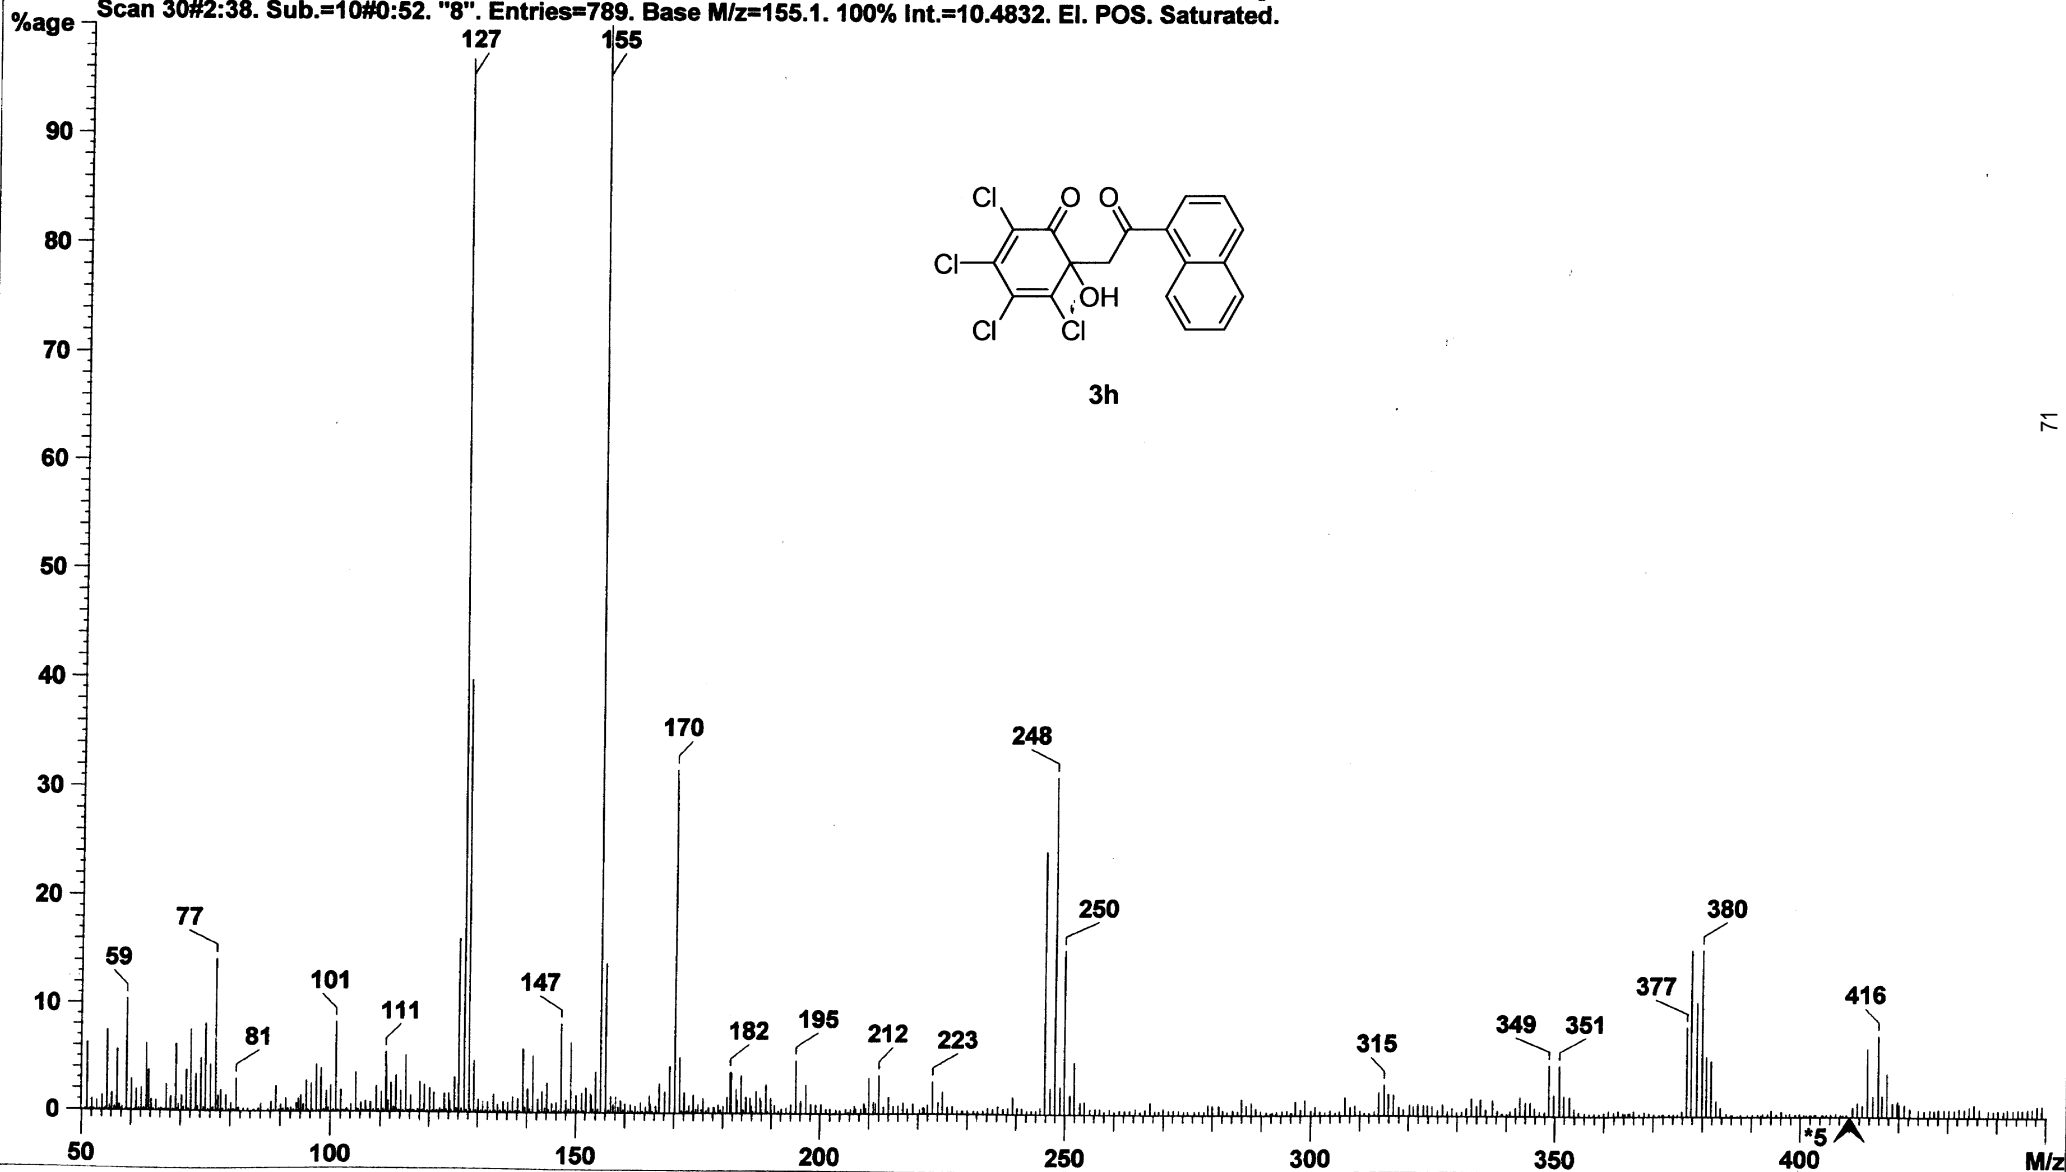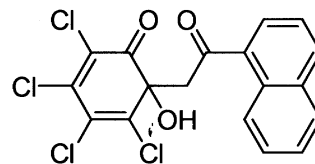

3h

# Peking University Mass Spectrometry Sample Analysis Report

## Analysis Info

Analysis Name 81396\_20081212\_000001.d  
Sample 17  
Comment ESI Positive

Acquisition Date 12/12/2008 3:22:26 PM  
Instrument Bruker Apex IV FTMS  
Operator Peking University

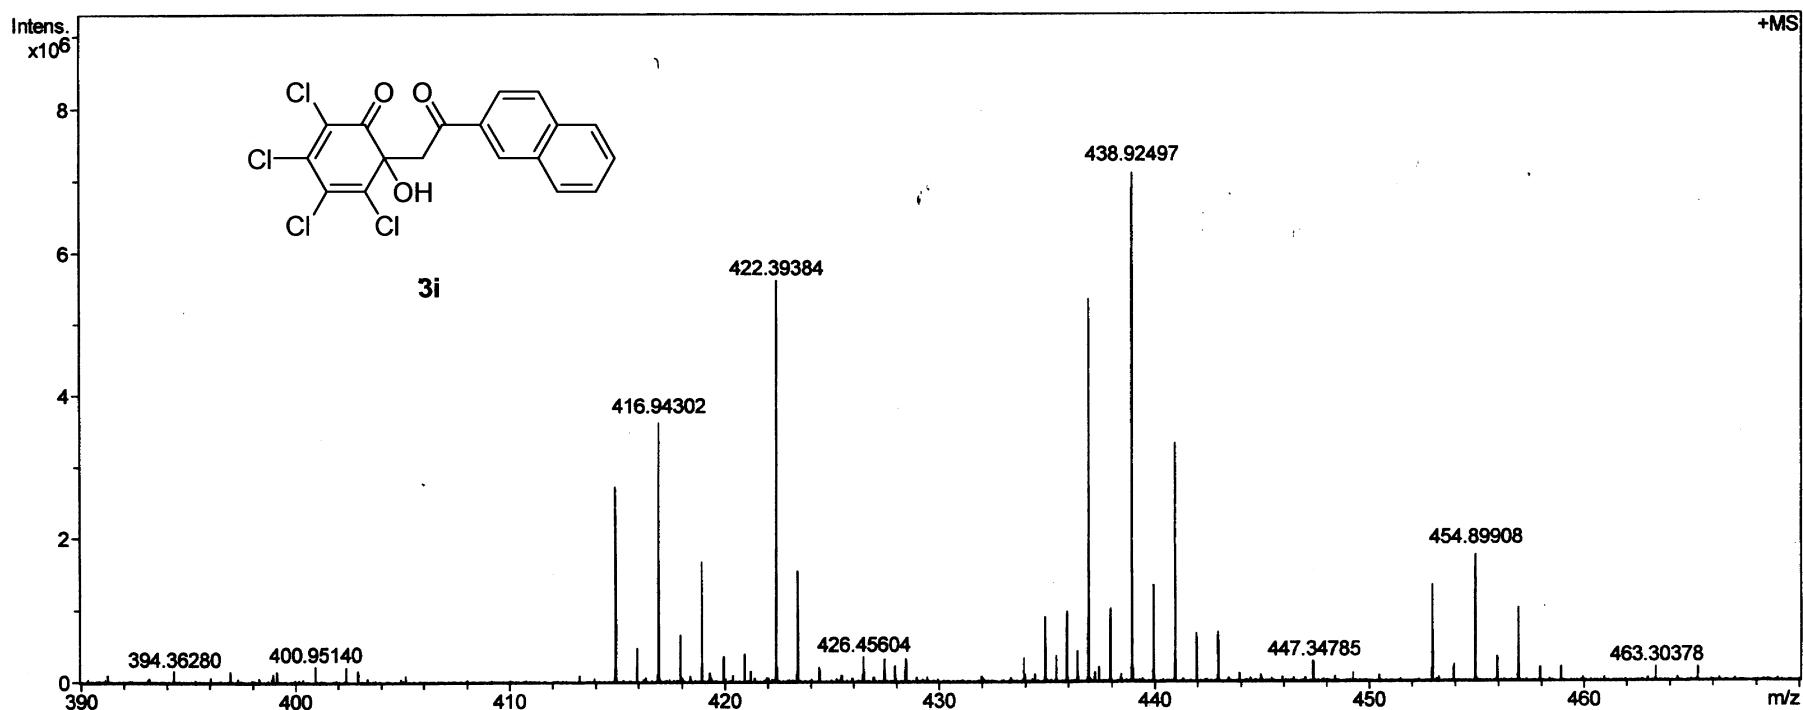

| Sum Formula                                                    | Sigma | m/z       | Err [ppm] | Mean Err [ppm] | Err [mDa] | rdb   | N Rule | e <sup>-</sup> |
|----------------------------------------------------------------|-------|-----------|-----------|----------------|-----------|-------|--------|----------------|
| C <sub>18</sub> H <sub>11</sub> Cl <sub>4</sub> O <sub>3</sub> | 0.012 | 414.94568 | -0.29     | -0.29          | -0.12     | 11.50 | ok     | even           |



File Name : j:\maspec2\data\81468.ms2  
Creation Date/Time : 08-12-15 at 8:53:24  
File Type : Lo-Res Data - Raw (Magnet)  
File Source : Acquired on MASPEC II system [msw/9888]  
Operator : Peking University  
Instrument : ZAB-HS

SCAN GRAPH. Flagging=Nom.M/z. Ctd=[Thr:1000, Min.Hgt:1000, Min.Wid(Mlt):10(7), Inc:10%, Res:10%].  
Scan 32#2:48. Sub.=10#0:52. "17". Entries=492. Base M/z=123.1. 100% Int.=4.6336. EI. POS.

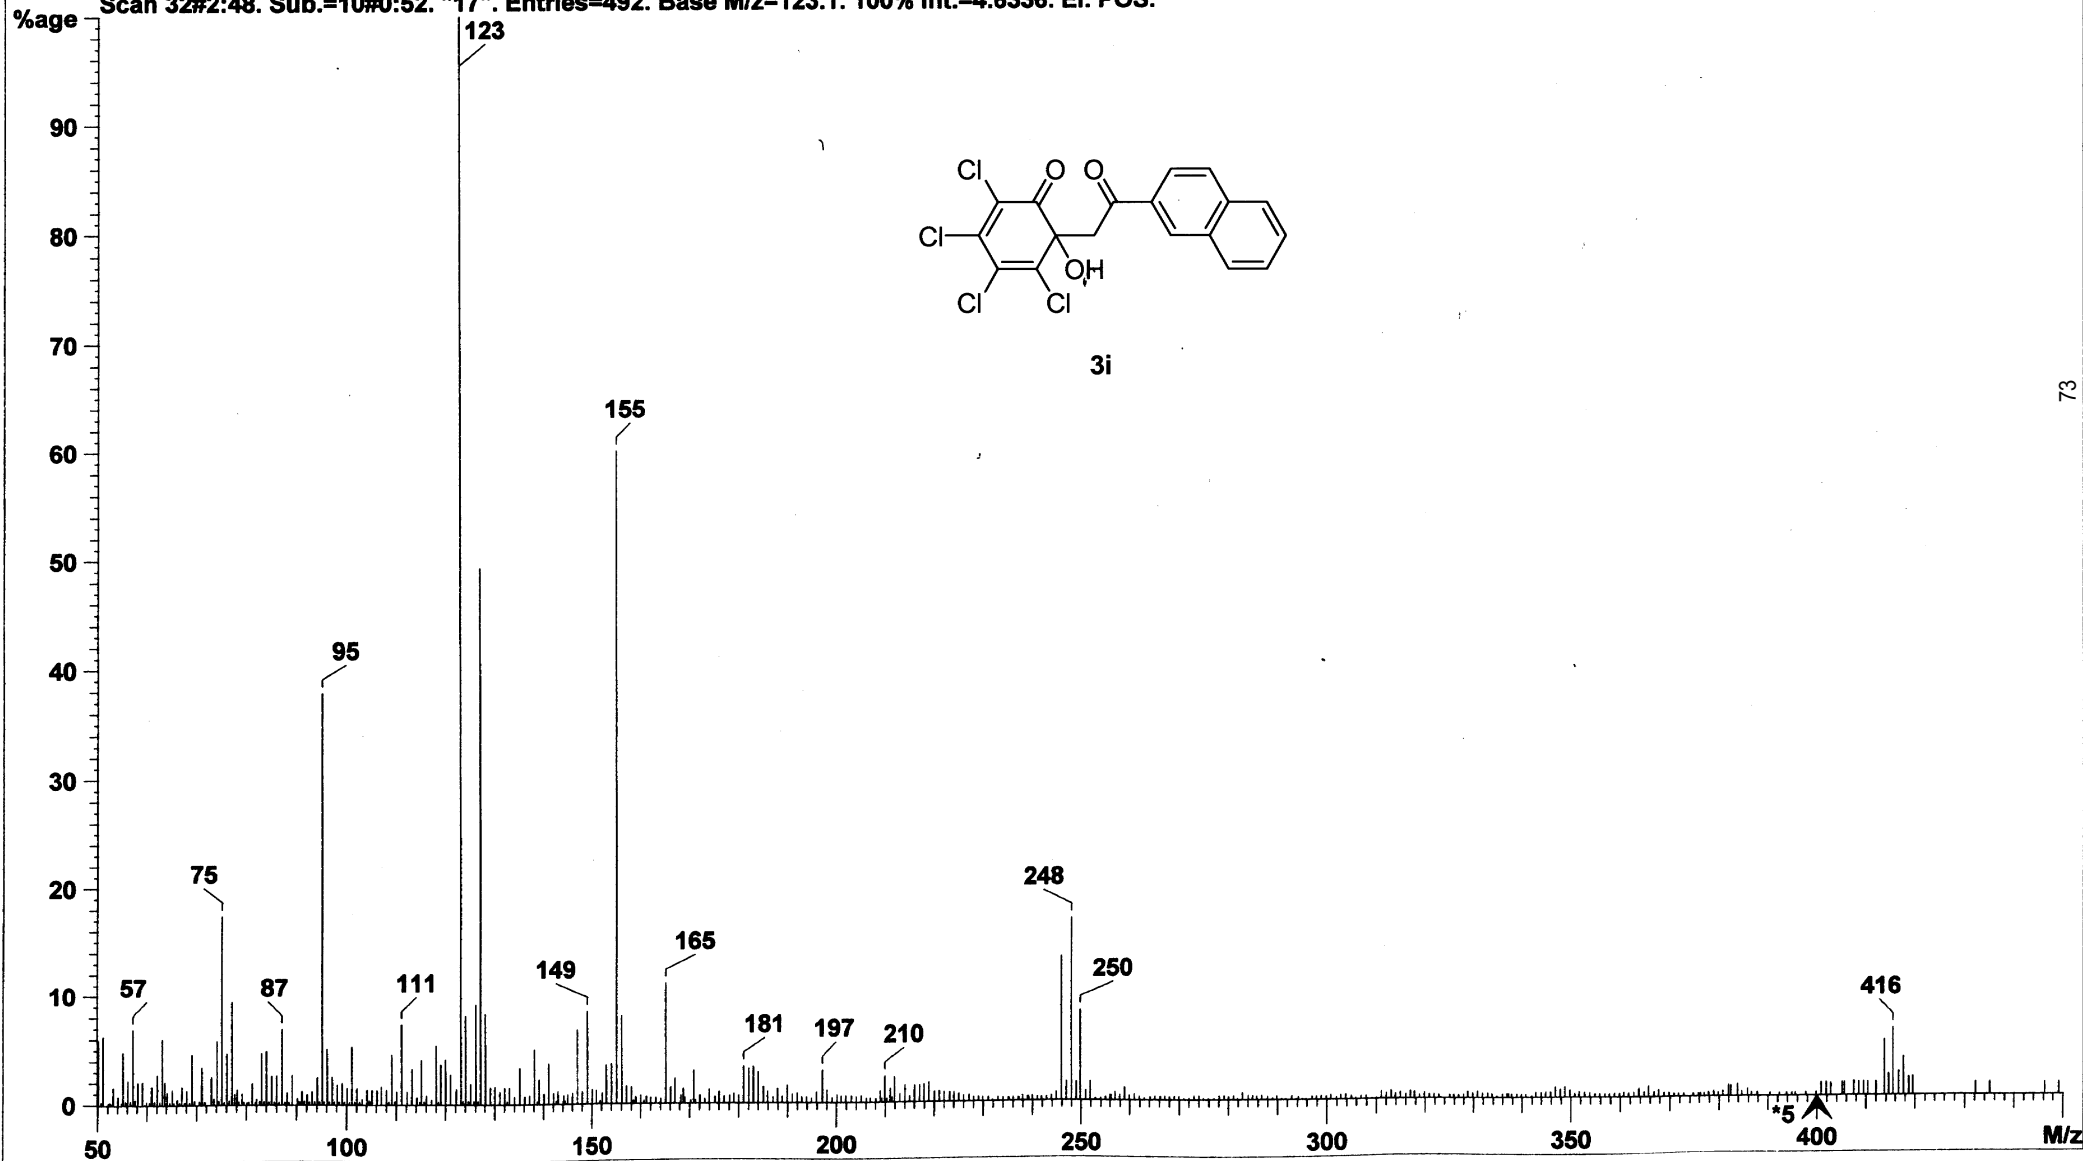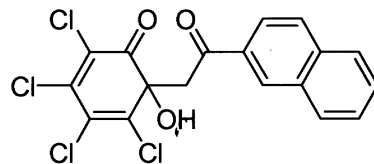

3i

File Name : j:\maspec2\data\81454.ms2  
Creation Date/Time : 08-12-12 at 8:49:33  
File Type : Lo-Res Data - Raw (Magnet)  
File Source : Acquired on MASPEC II system [msw/9888]  
Operator : Peking University  
Instrument : ZAB-HS

SCAN GRAPH. Flaggng=Nom.M/z. Ctd=[Thr:1000, Min.Hgt:1000, Min.Wid(Mlt):10(7), Inc:10%, Res:10%].  
Scan 39#3:25. Sub.=1#0:04. "9". Entries=605. Base M/z=57.1. 100% Int.=0.98736. EI. POS.

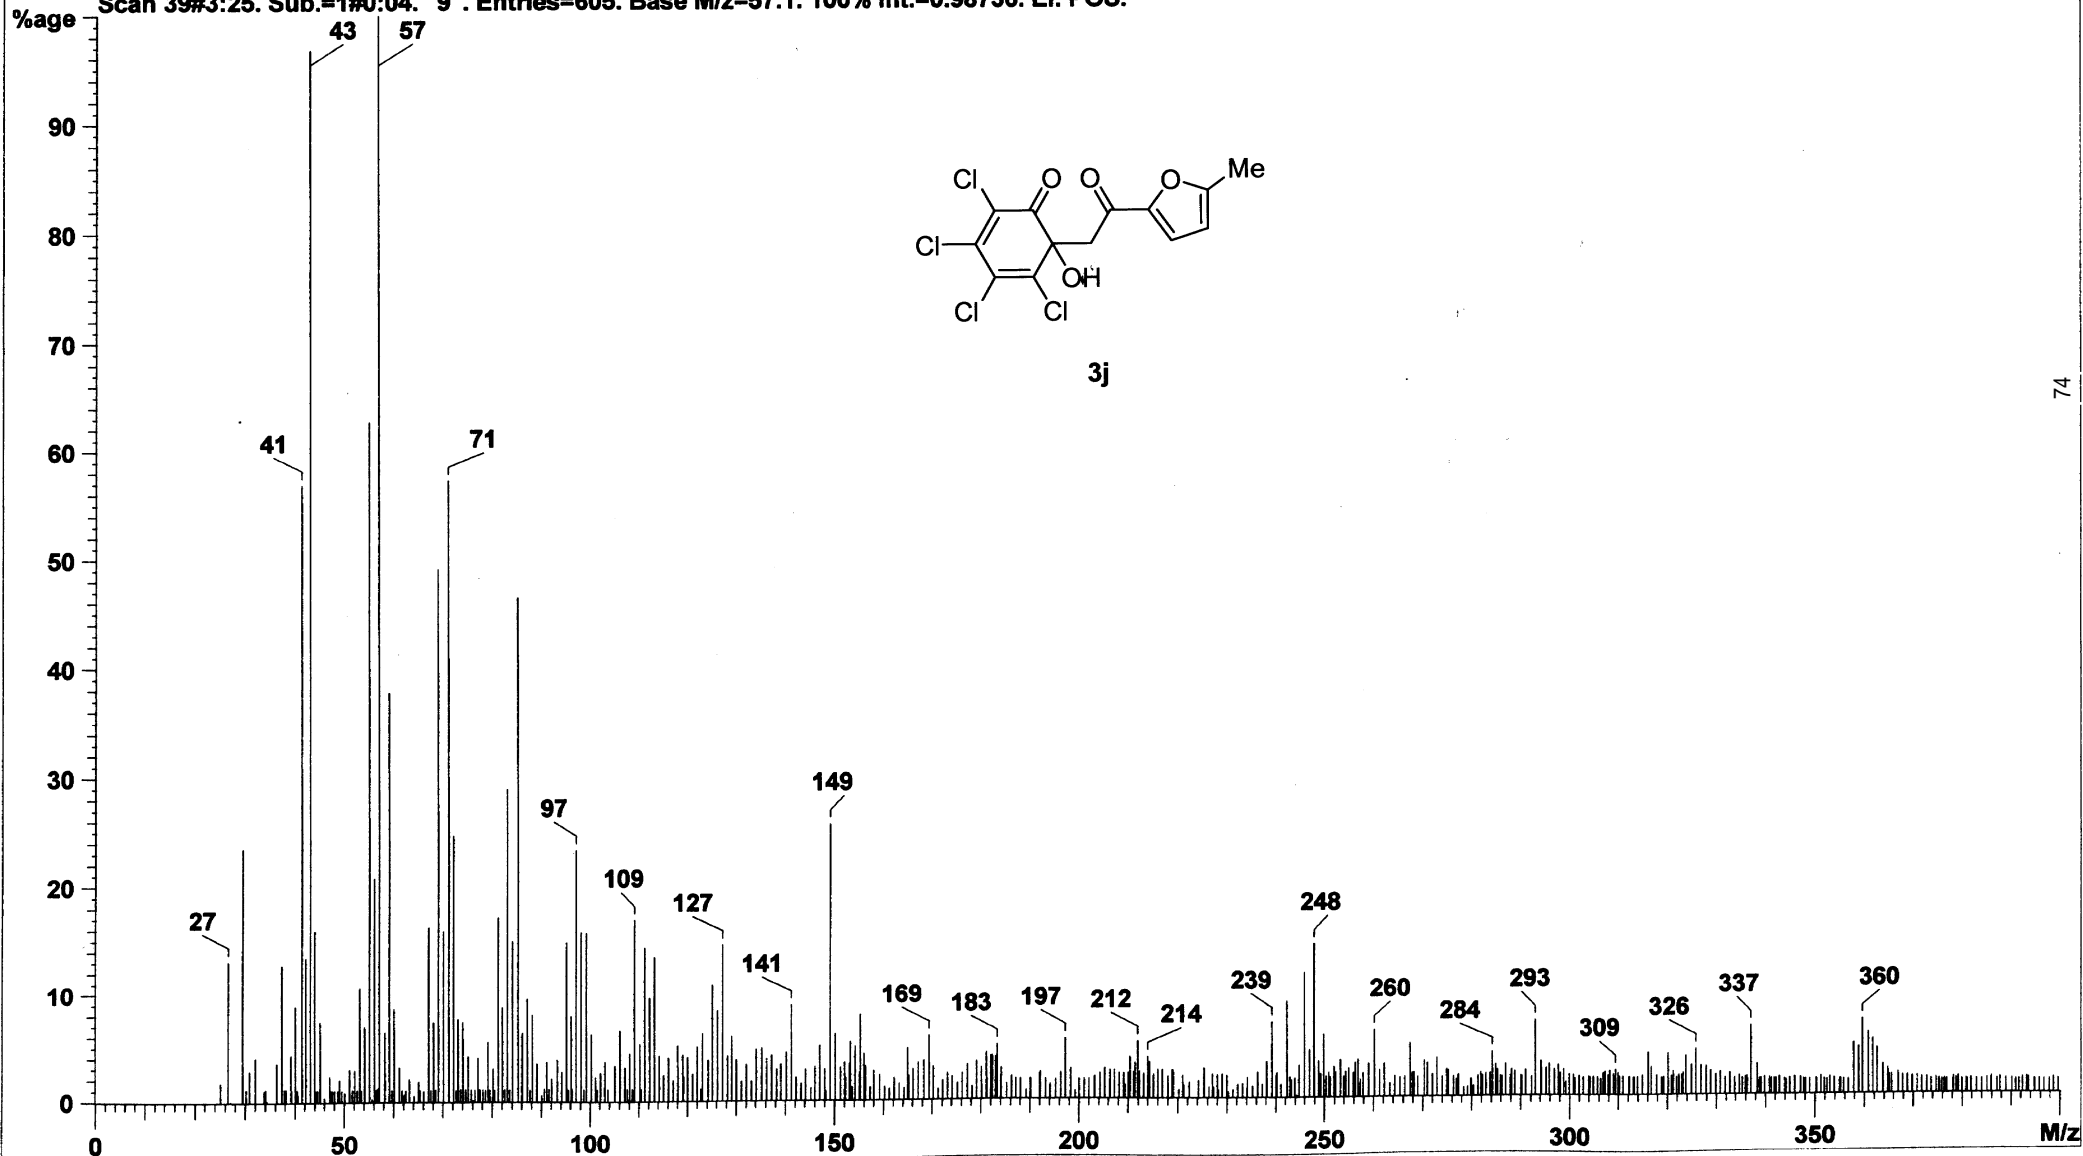

File Name : e:\maspec2\data\73467.ms2  
Creation Date/Time : 08-1-4 at 14:58:56  
File Type : Lo-Res Data - Raw (Magnet)  
File Source : Acquired on MASPEC II system [msw/9888]  
Operator : Peking University  
Instrument : ZAB-HS

SCAN GRAPH. Flagging=Nom.M/z. Ctd=[Thr:1000, Min.Hgt:1000, Min.Wid(Mlt):10(7), Inc:10%, Res:10%].  
Scan 13#1:08. Sub.=3#0:15. Entries=955. Base M/z=43. 100% Int.=10.20928. EI. POS. Saturated.

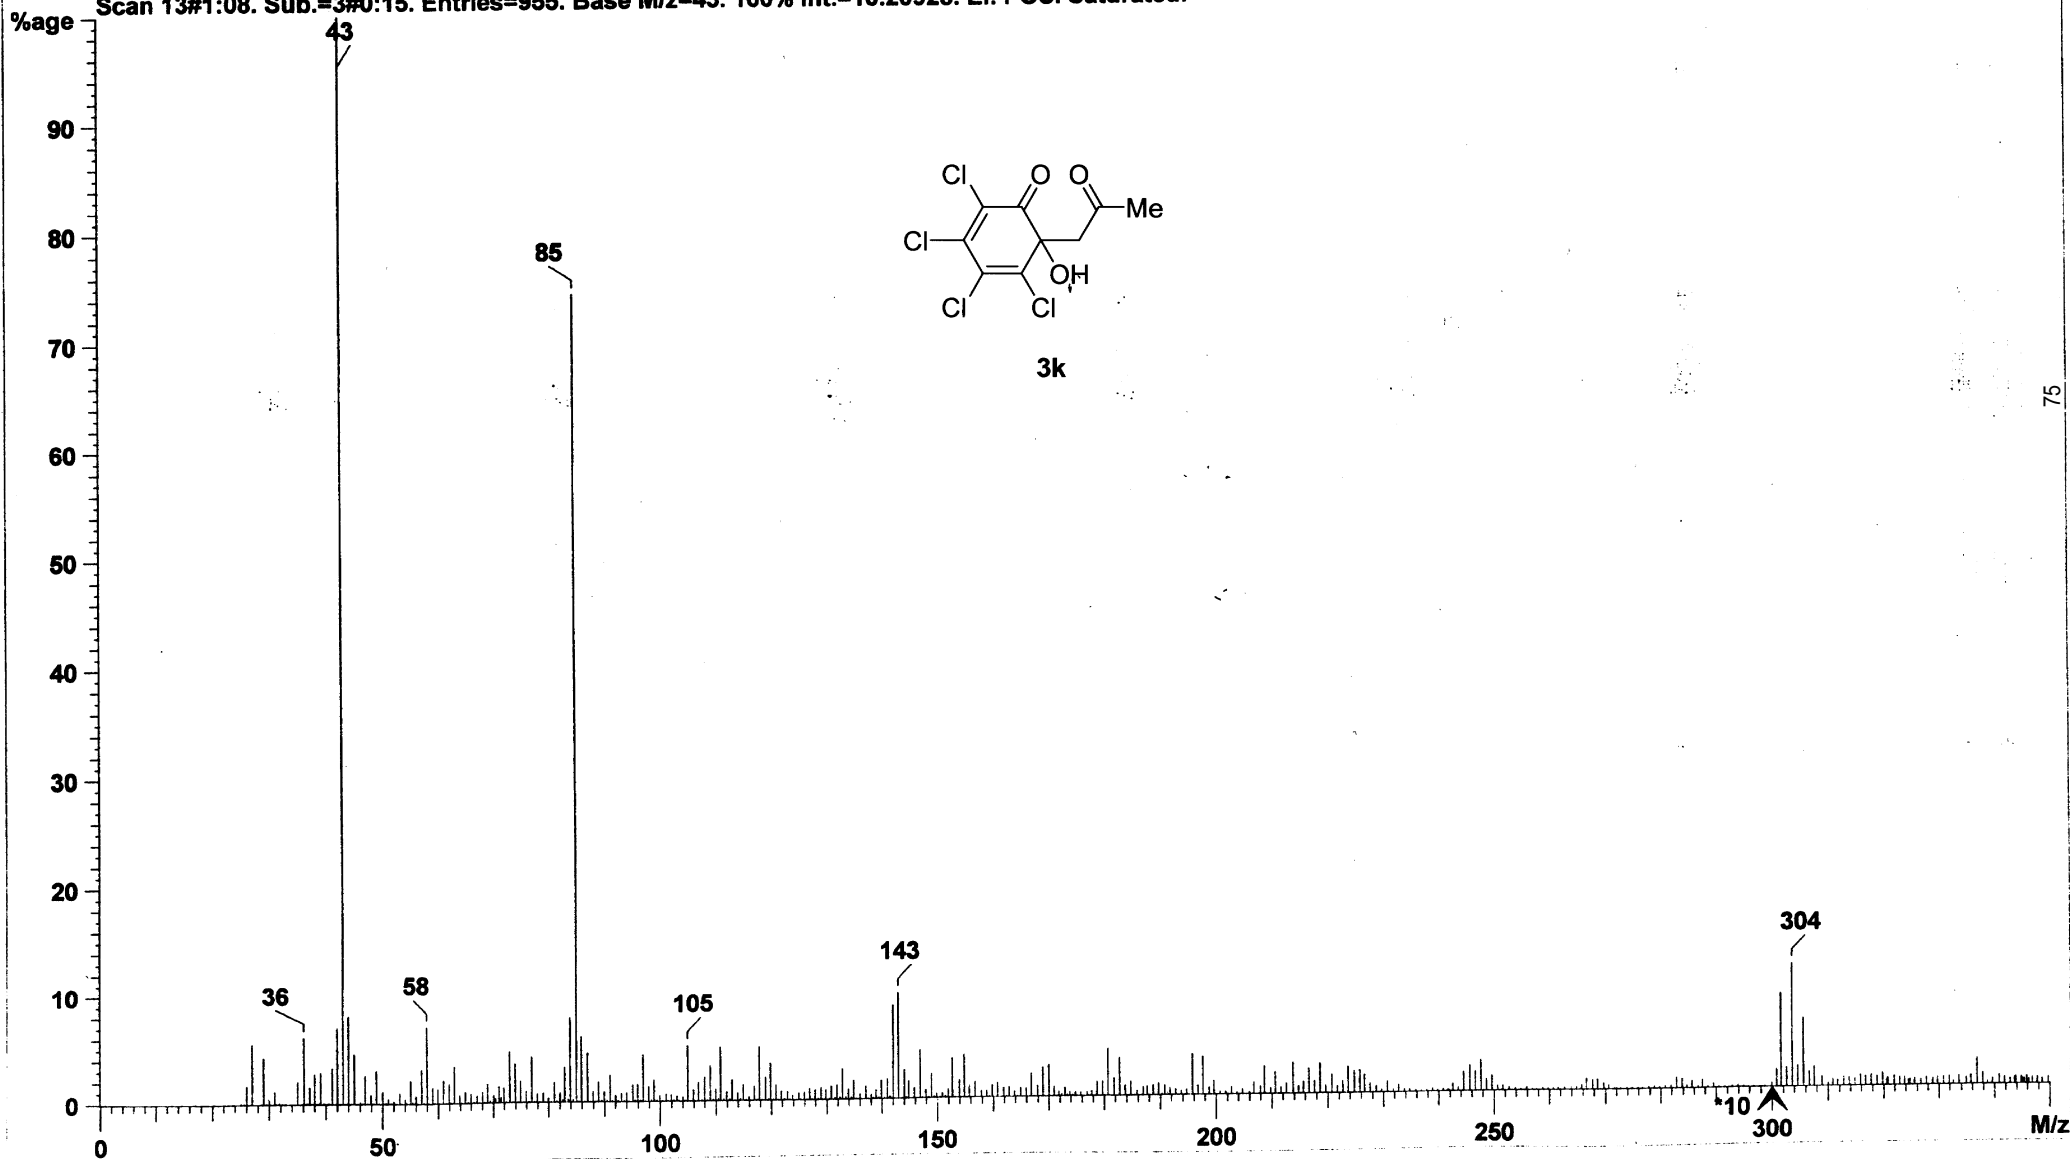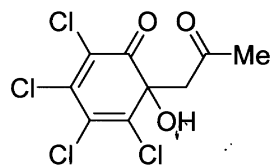

3k

File Name : j:\maspec2\data\81455.ms2  
Creation Date/Time : 08-12-12 at 9:14:41  
File Type : Lo-Res Data - Raw (Magnet)  
File Source : Acquired on MASPEC II system [msw/9888]  
Operator : Peking University  
Instrument : ZAB-HS

SCAN GRAPH. Flagging=Nom.M/z. Ctd=[Thr:1000, Min.Hgt:1000, Min.Wid(Mlt):10(7), Inc:10%, Res:10%].

Scan 5#0:26. Sub.=10#0:52. "12". Entries=310. Base M/z=43.1. 100% Int.=1.39648. El. POS.

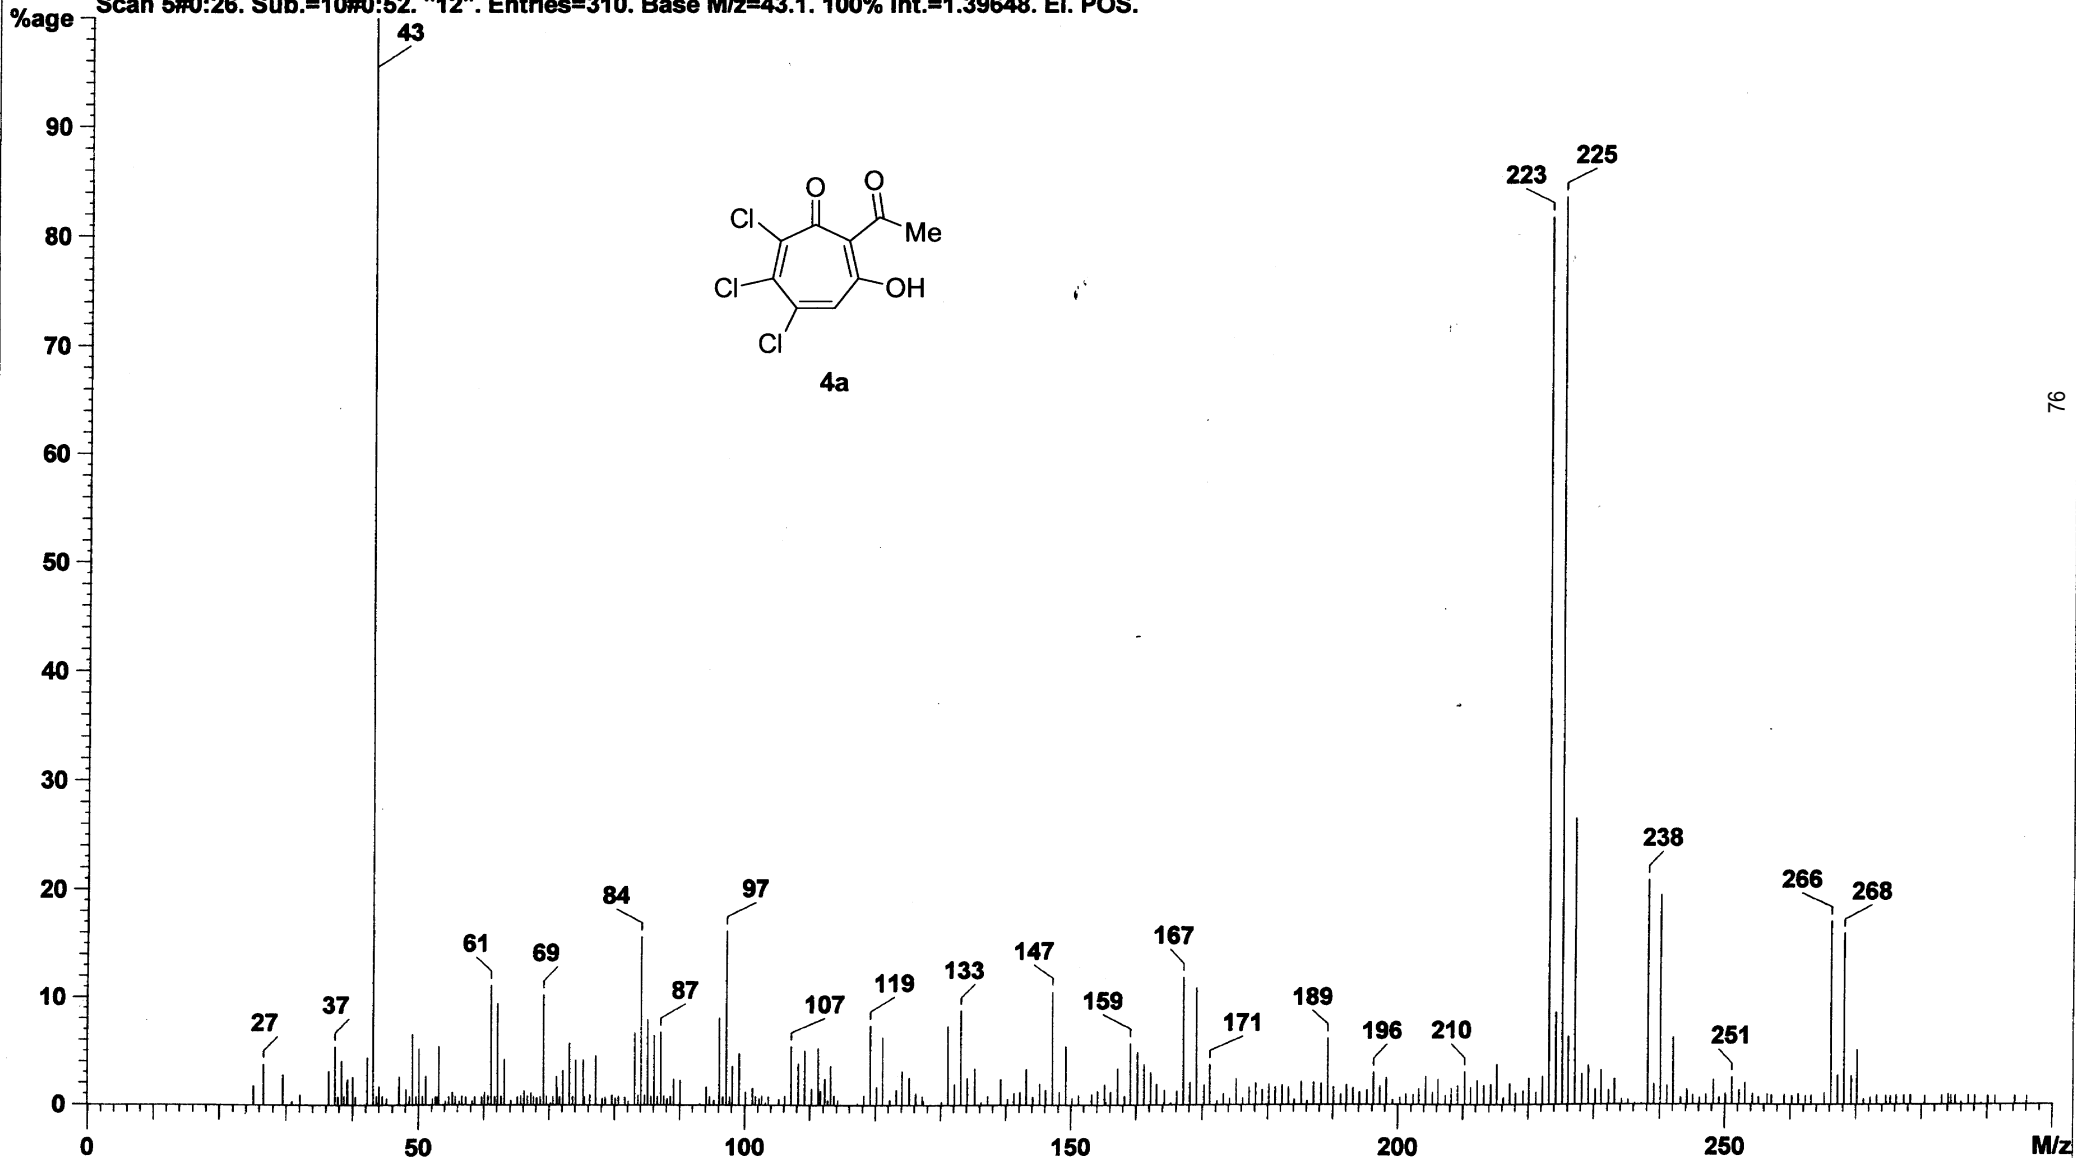

# Peking University Mass Spectrometry Sample Analysis Report

**Analysis Info**

**Analysis Name** 81370\_20081210\_000001.d  
**Sample** 13  
**Comment** ESI Positive

**Acquisition Date** 12/10/2008 4:34:01 PM  
**Instrument** Bruker Apex IV FTMS  
**Operator** Peking University

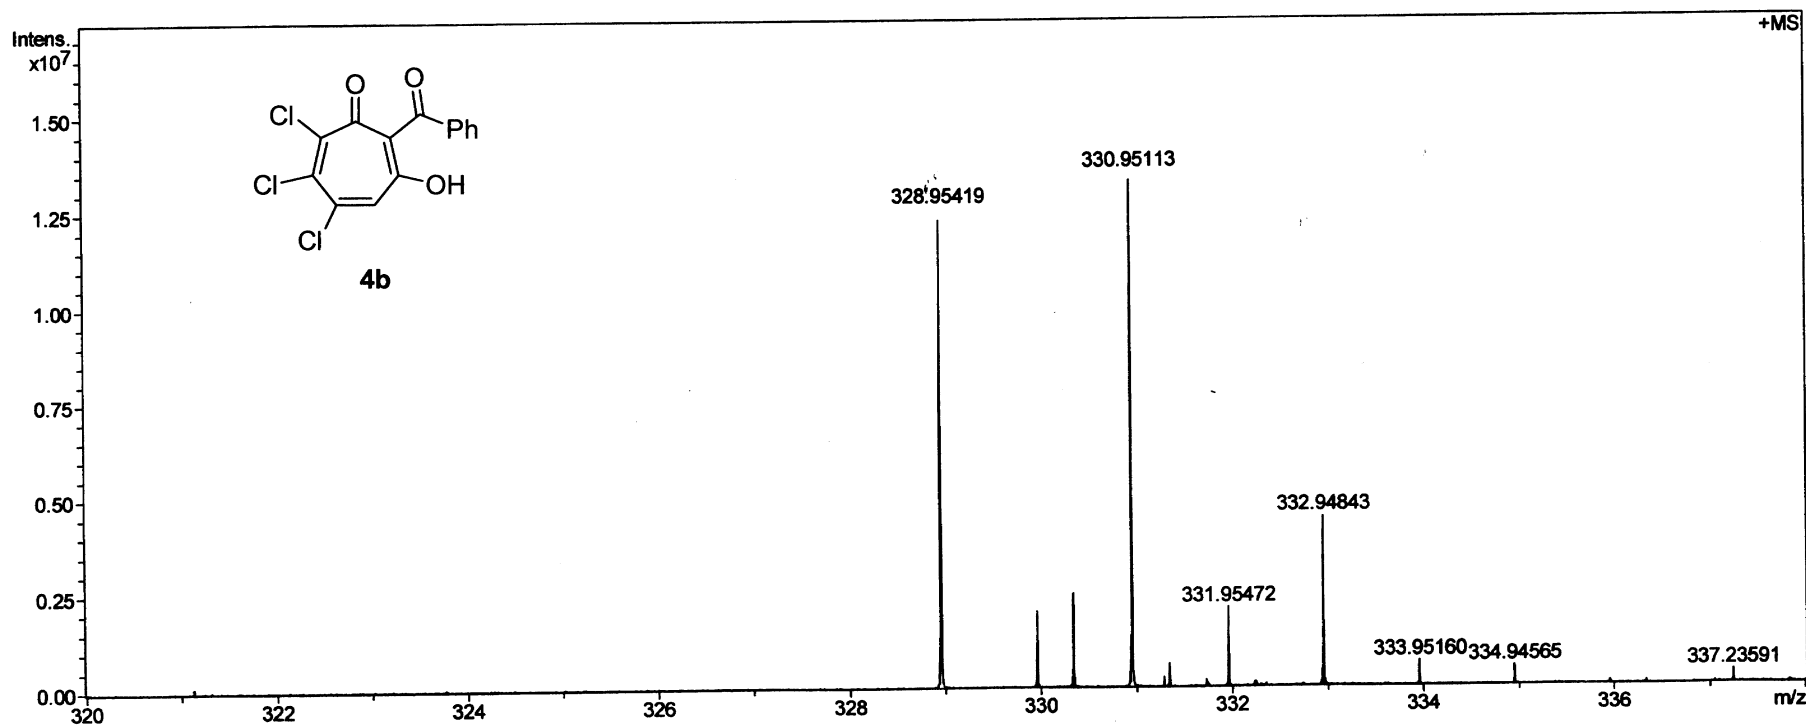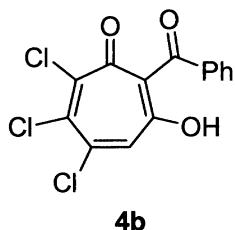

| Sum               | Formula | Sigma | m/z       | Err [ppm] | Mean Err [ppm] | Err [mDa] | rdB   | N Rule | e <sup>-</sup> |
|-------------------|---------|-------|-----------|-----------|----------------|-----------|-------|--------|----------------|
| C 14 H 8 Cl 3 O 3 |         | 0.027 | 328.95335 | -2.53     | -2.05          | -0.83     | 9.50  | ok     | even           |
| C 20 H 3 Cl 2 O 1 |         | 0.167 | 328.95555 | 4.13      | 5.10           | 1.36      | 18.50 | ok     | even           |

File Name : j:\maspec2\data\81456.ms2  
Creation Date/Time : 08-12-12 at 9:17:51  
File Type : Lo-Res Data - Raw (Magnet)  
File Source : Acquired on MASPEC II system [msw/9888]  
Operator : Peking University  
Instrument : ZAB-HS

SCAN GRAPH. Flagging=Nom.M/z. Ctd=[Thr:1000, Min.Hgt:1000, Min.Wid(Mlt):10(7), Inc:10%, Res:10%].

Scan 22#1:55. Sub.=1#0:04. "13". Entries=424. Base M/z=77.1. 100% Int.=3.14001. EI. POS.

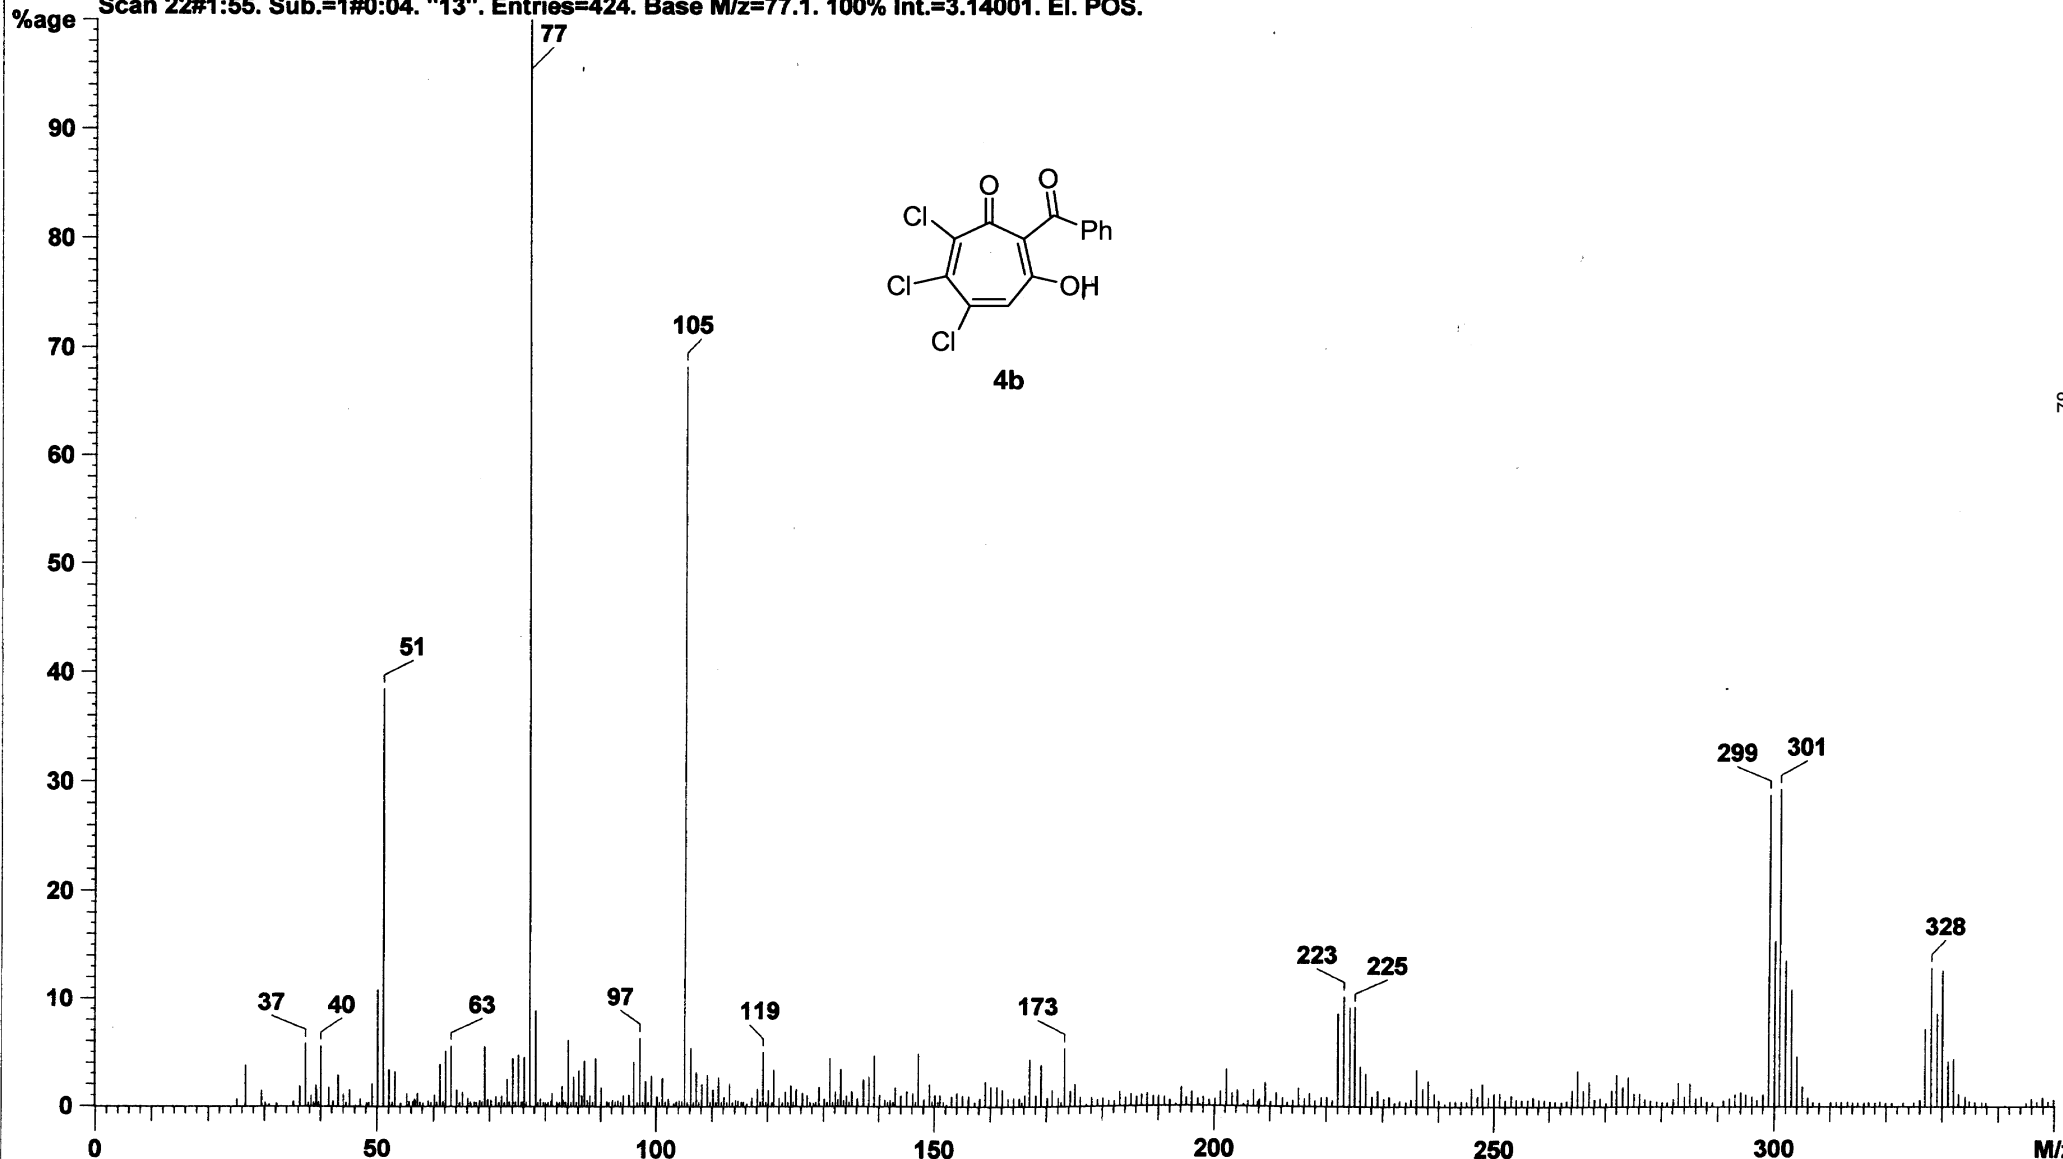

# Peking University Mass Spectrometry Sample Analysis Report

**Analysis Info**

**Analysis Name** 81371\_20081210\_000004.d  
**Sample** 14  
**Comment** ESI Positive

**Acquisition Date**  
**Instrument**  
**Operator**

12/10/2008 4:58:49 PM  
 Bruker Apex IV FTMS  
 Peking University

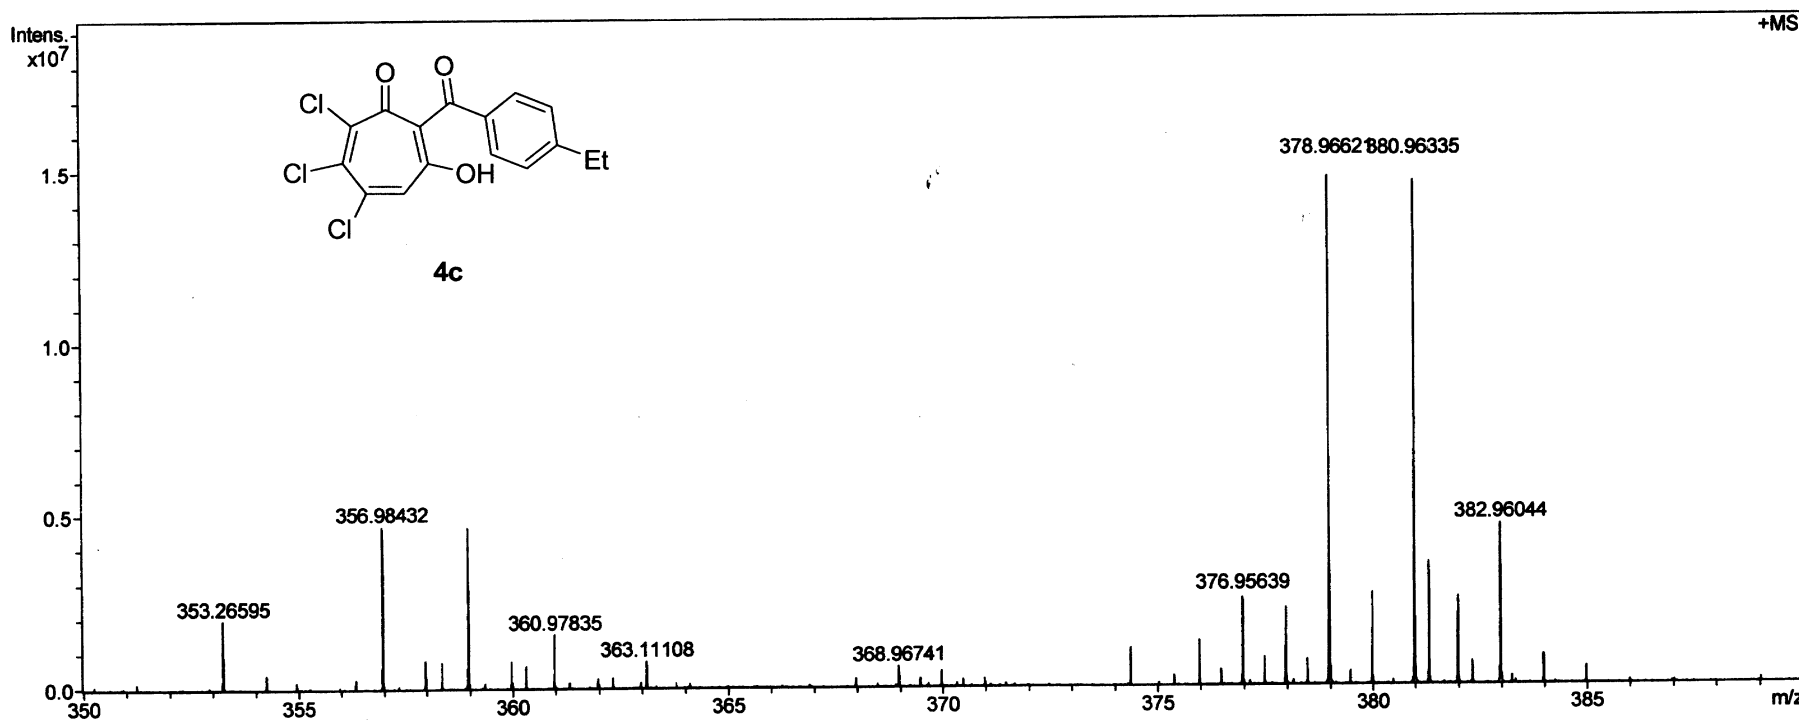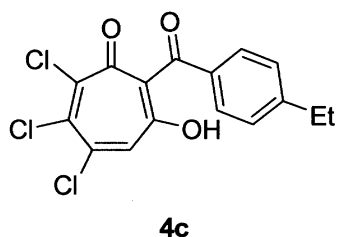

| Sum  | Formula           | Sigma | m/z       | Err [ppm] | Mean Err [ppm] | Err [mDa] | rdb   | N Rule | e <sup>-</sup> |
|------|-------------------|-------|-----------|-----------|----------------|-----------|-------|--------|----------------|
| C 16 | H 12 Cl 3 O 3     | 0.004 | 356.98465 | 0.93      | 1.45           | 0.33      | 9.50  | ok     | even           |
| C 14 | H 10 Cl 3 N 3 O 2 | 0.010 | 356.98331 | -2.83     | -2.58          | -1.01     | 10.00 | ok     | odd            |
| C 17 | H 7 Cl 2 N 2 O 3  | 0.161 | 356.98282 | -4.19     | -3.46          | -1.50     | 14.50 | ok     | even           |

File Name : j:\maspec2\data\81457.ms2  
Creation Date/Time : 08-12-12 at 9:31:52  
File Type : Lo-Res Data - Raw (Magnet)  
File Source : Acquired on MASPEC II system [msw/9888]  
Operator : Peking University  
Instrument : ZAB-HS

SCAN GRAPH. Flagging=Nom.M/z. Ctd=[Thr:1000, Min.Hgt:1000, Min.Wid(Mlt):10(7), Inc:10%, Res:10%].  
Scan 37#3:20. Sub.=1#0:04. "14". Entries=555. Base M/z=133.3. 100% Int.=2.64448. EI. POS.

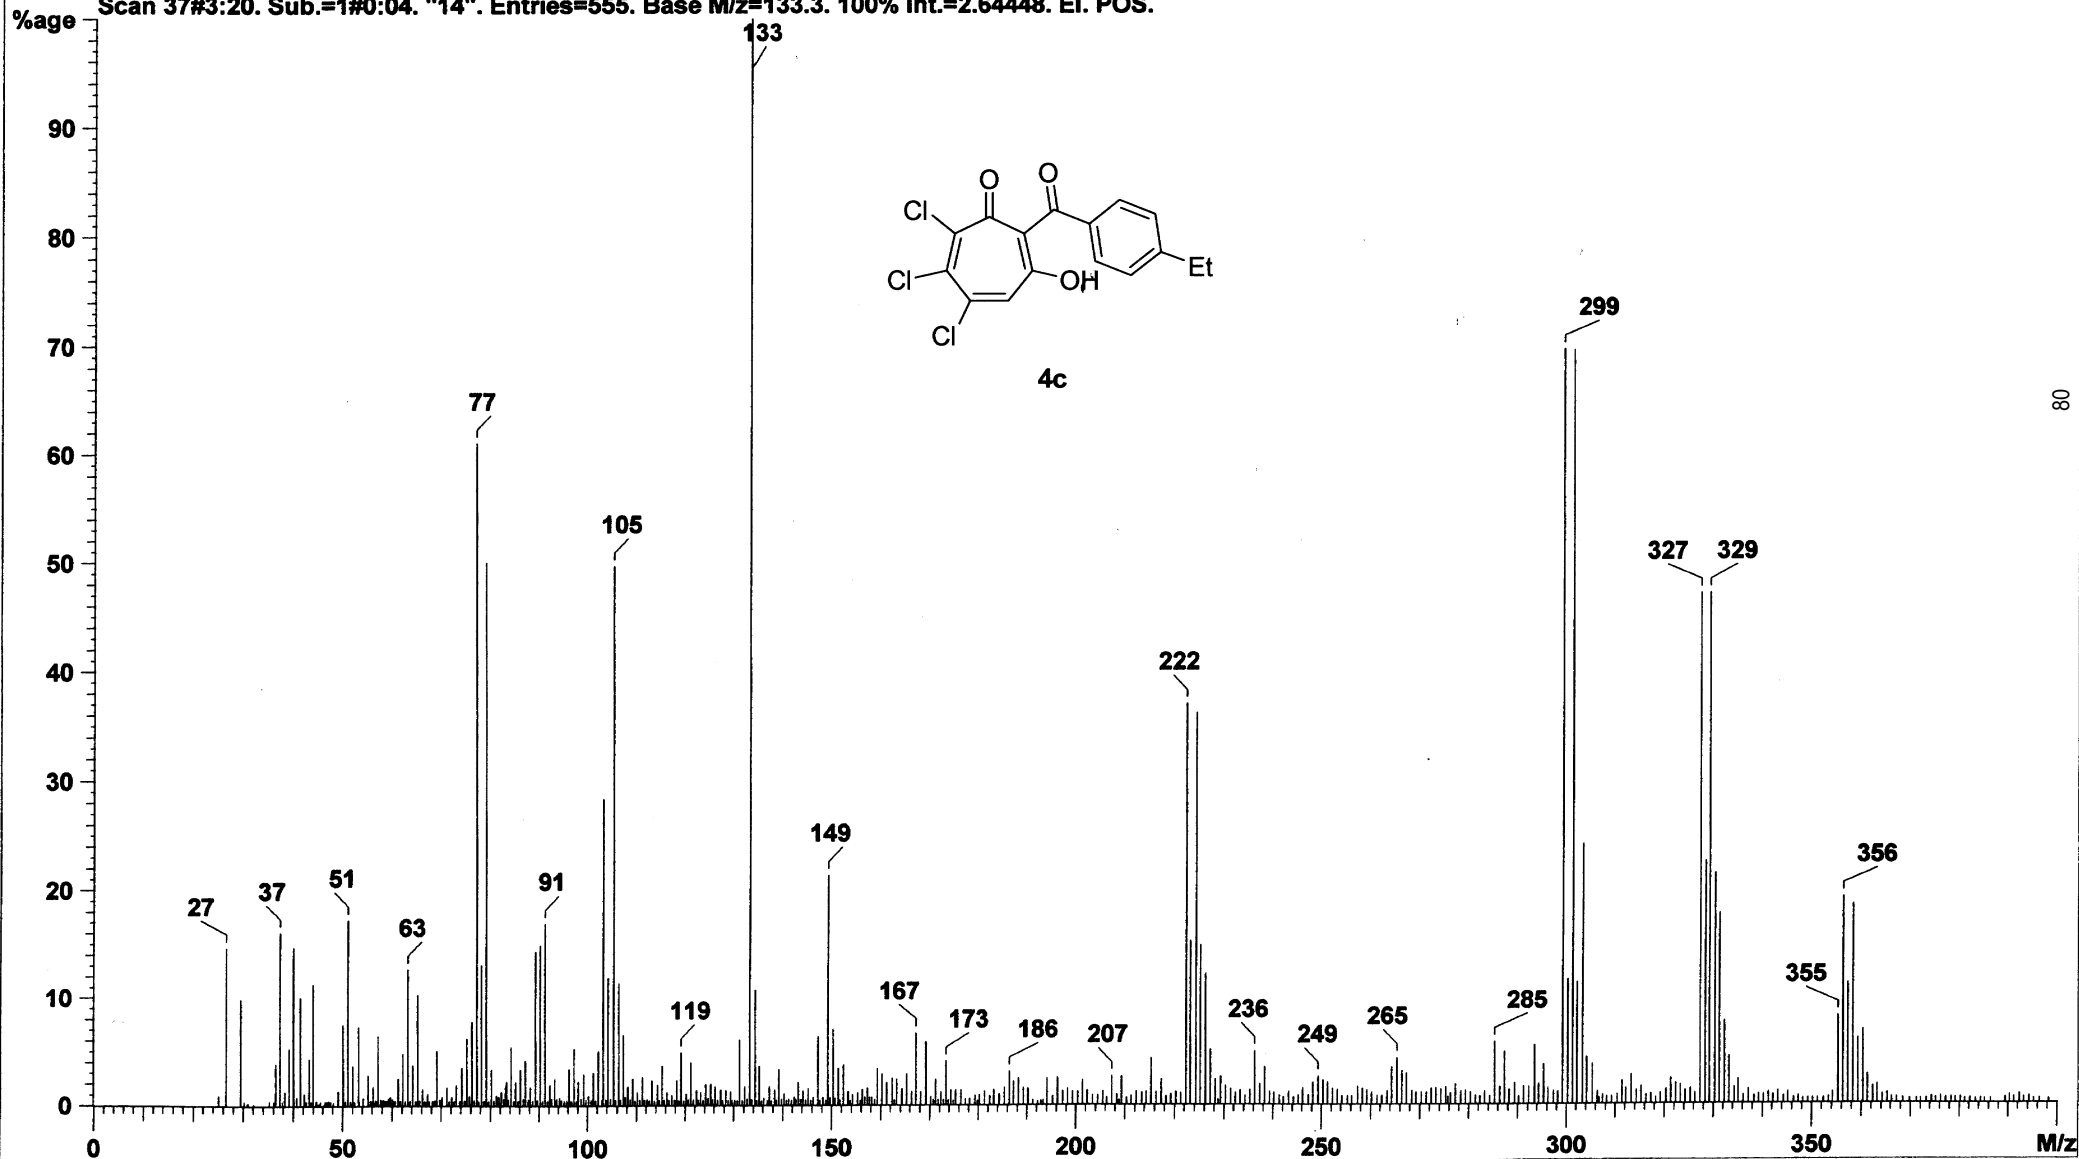



# Peking University Mass Spectrometry Sample Analysis Report

**Analysis Info**

**Analysis Name** 81427\_20081216\_000001.d  
**Sample** 15  
**Comment** ESI Positive

**Acquisition Date** 12/16/2008 4:50:06 PM  
**Instrument** Bruker Apex IV FTMS  
**Operator** Peking University

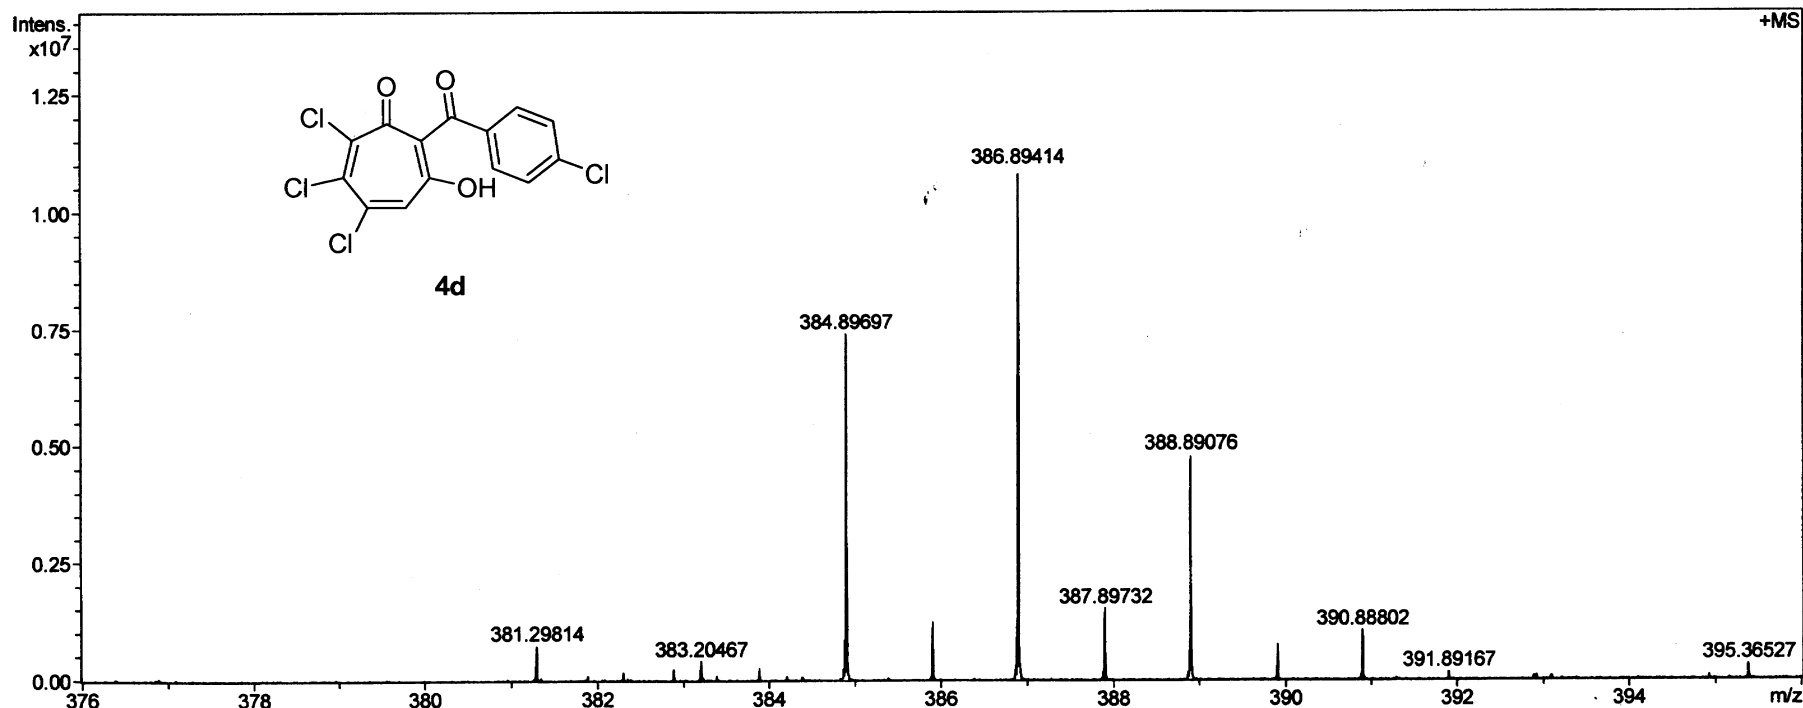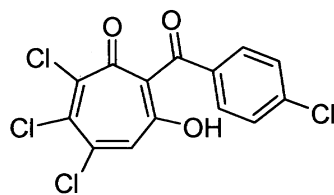
**4d**

| Sum Formula            | Sigma | m/z       | Err [ppm] | Mean Err [ppm] | Err [mDa] | rdb   | N Rule | e <sup>-</sup> |
|------------------------|-------|-----------|-----------|----------------|-----------|-------|--------|----------------|
| C 14 H 6 Cl 4 Na 1 O 3 | 0.036 | 384.89633 | -1.67     | -1.24          | -0.64     | 9.50  | ok     | even           |
| C 16 H 5 Cl 4 O 3      | 0.038 | 384.89873 | 4.58      | 5.07           | 1.76      | 12.50 | ok     | even           |

File Name : j:\maspec2\data\81479.ms2  
 Creation Date/Time : 08-12-17 at 10:23:06  
 File Type : Lo-Res Data - Raw (Magnet)  
 File Source : Acquired on MASPEC II system [msw/9888]  
 Operator : Peking University  
 Instrument : ZAB-HS

SCAN GRAPH. Flagging=Nom.M/z. Ctd=[Thr:1000, Min.Hgt:1000, Min.Wid(Mit):10(7), Inc:10%, Res:10%].

Scan 24#2:11. Sub.=1#0:04. "15". Entries=443. Base M/z=43.1. 100% Int.=2.9056. EI. POS.

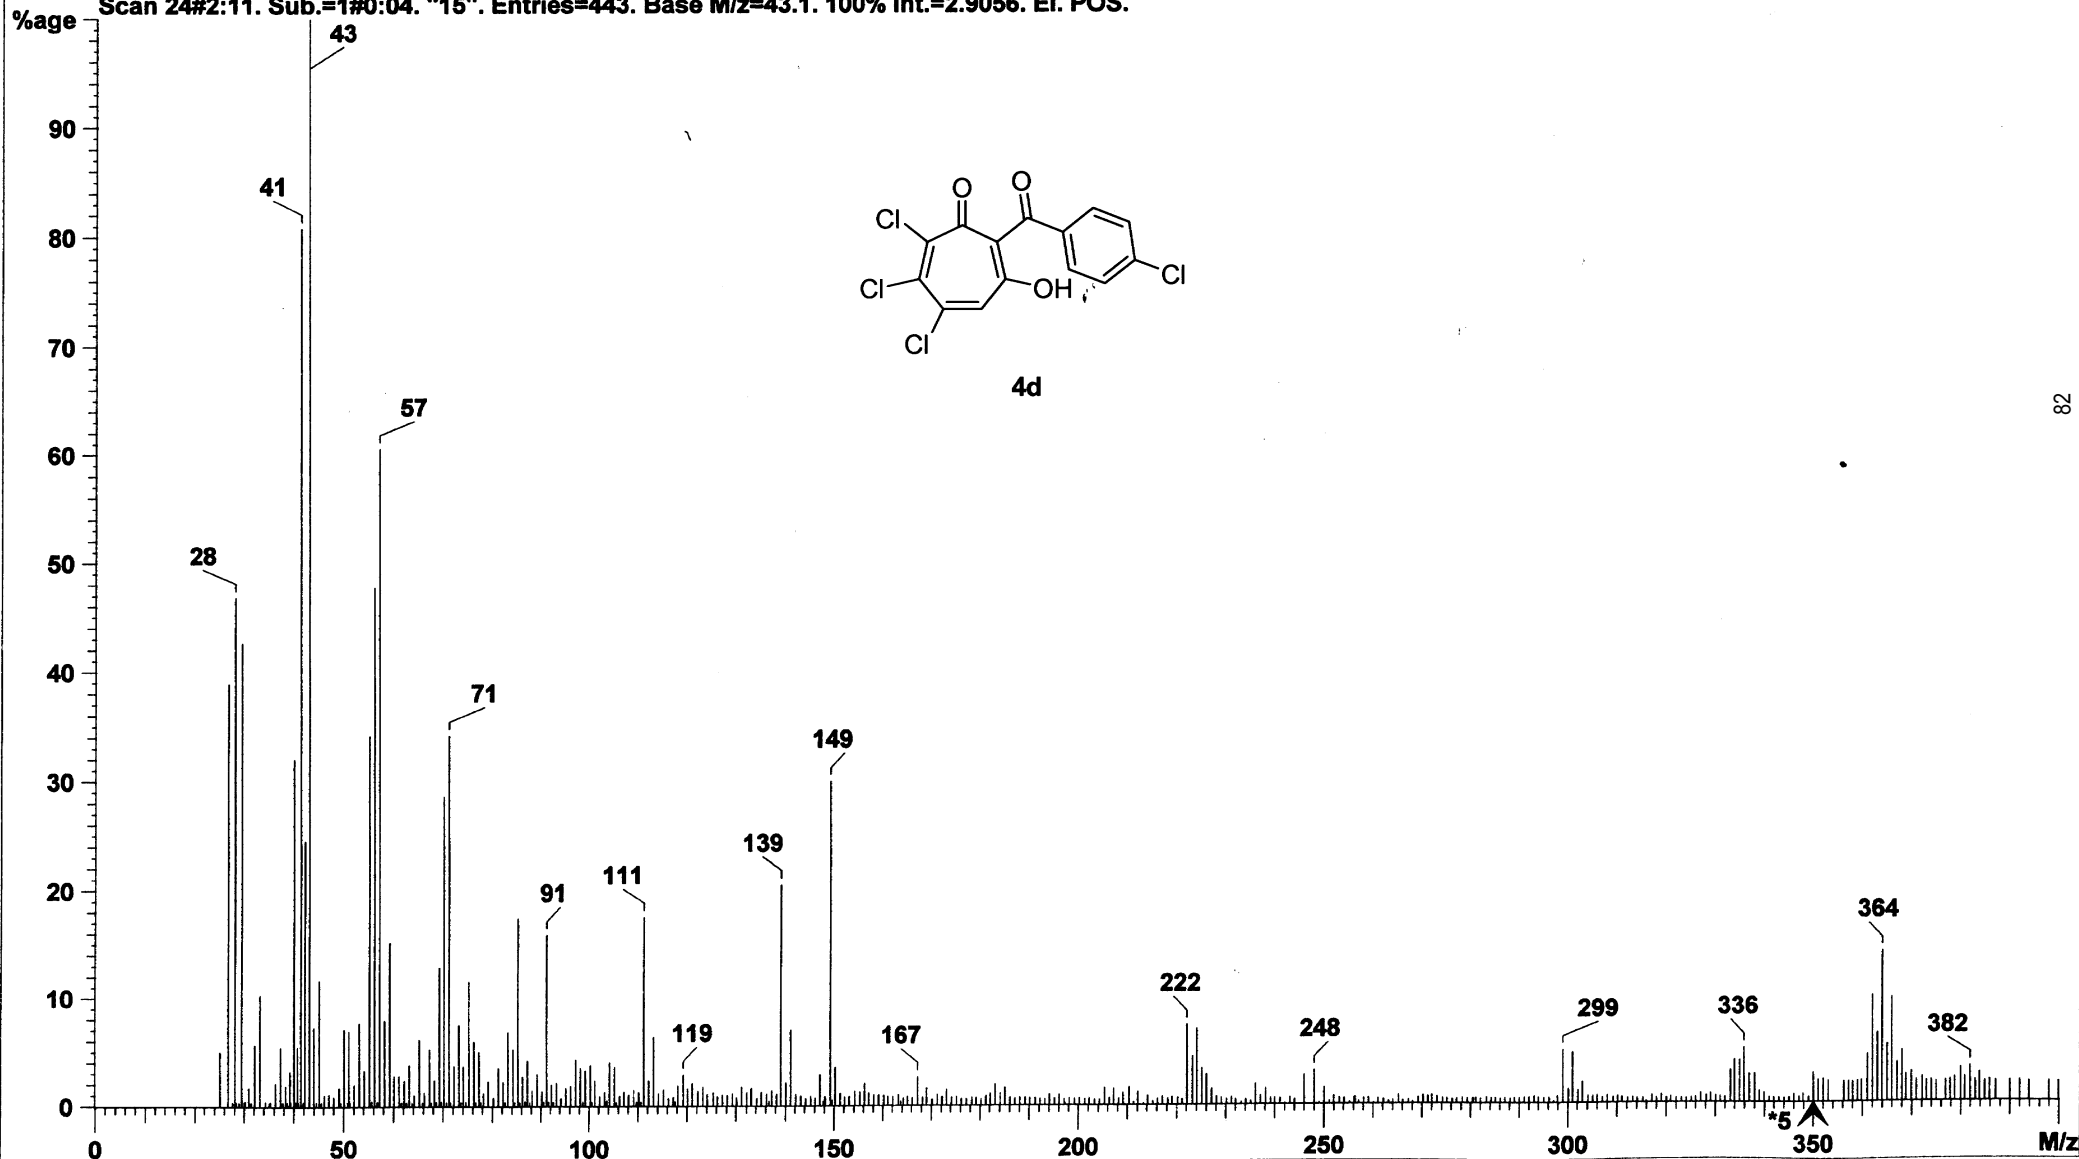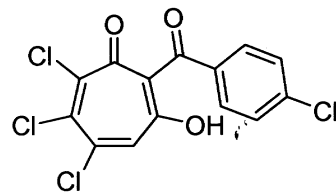

4d

# Peking University Mass Spectrometry Sample Analysis Report

**Analysis Info**

Analysis Name 81430\_20081216\_000001.d  
 Sample 20  
 Comment ESI Positive

Acquisition Date  
 Instrument  
 Operator

12/16/2008 5:16:48 PM  
 Bruker Apex IV FTMS  
 Peking University

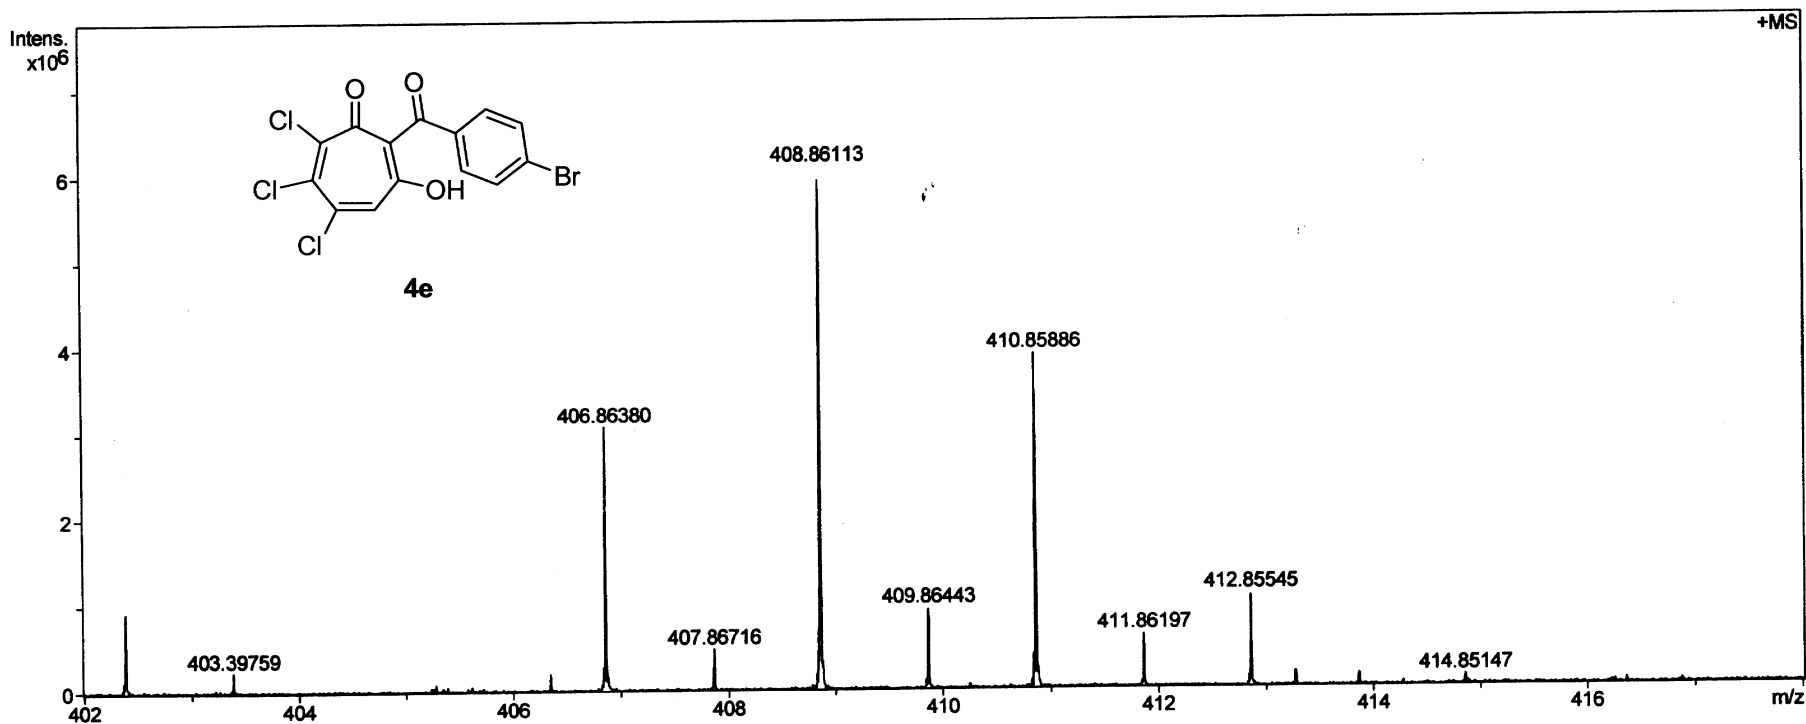

| Sum                    | Formula | Sigma | m/z       | Err [ppm] | Mean Err [ppm] | Err [mDa] | rdb  | N Rule | e <sup>-</sup> |
|------------------------|---------|-------|-----------|-----------|----------------|-----------|------|--------|----------------|
| C 14 H 7 Br 1 Cl 3 O 3 |         | 0.006 | 406.86387 | 0.15      | 0.60           | 0.06      | 9.50 | ok     | even           |

File Name : j:\maspec2\data\81467.ms2  
Creation Date/Time : 08-12-15 at 8:45:30  
File Type : Lo-Res Data - Raw (Magnet)  
File Source : Acquired on MASPEC II system [msw/9888]  
Operator : Peking University  
Instrument : ZAB-HS

SCAN GRAPH. Flagging=Nom.M/z. Ctd=[Thr:1000, Min.Hgt:1000, Min.Wid(Mlt):10(7), Inc:10%, Res:10%].  
Scan 41#3:41. Sub.=19#1:40. "16". Entries=503. Base M/z=123.3. 100% Int.=9.5872. EI. POS.

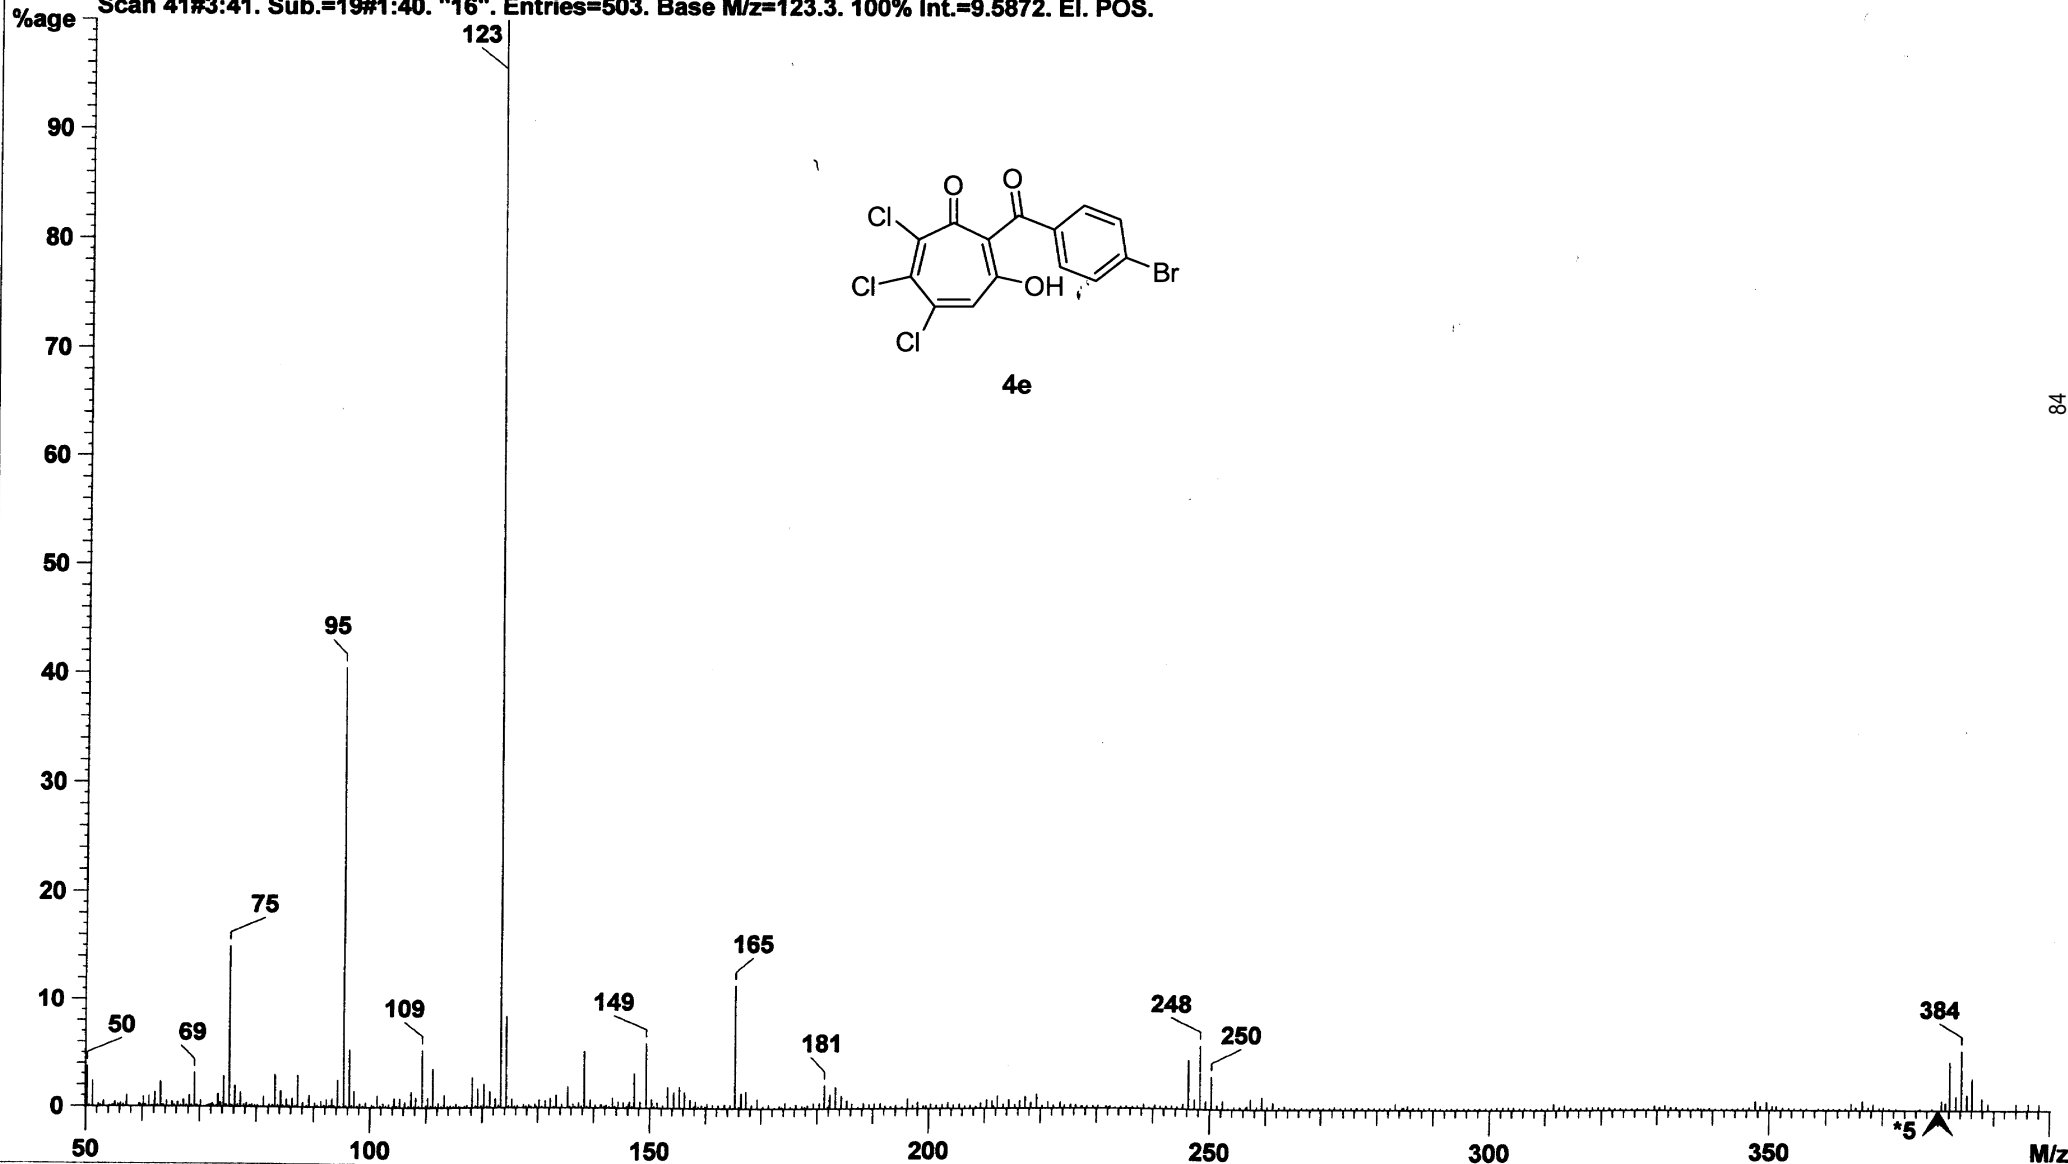

# Peking University Mass Spectrometry Sample Analysis Report

## Analysis Info

Analysis Name 81431\_20081216\_000001.d  
 Sample 21  
 Comment ESI Positive

Acquisition Date 12/16/2008 5:21:07 PM  
 Instrument Bruker Apex IV FTMS  
 Operator Peking University

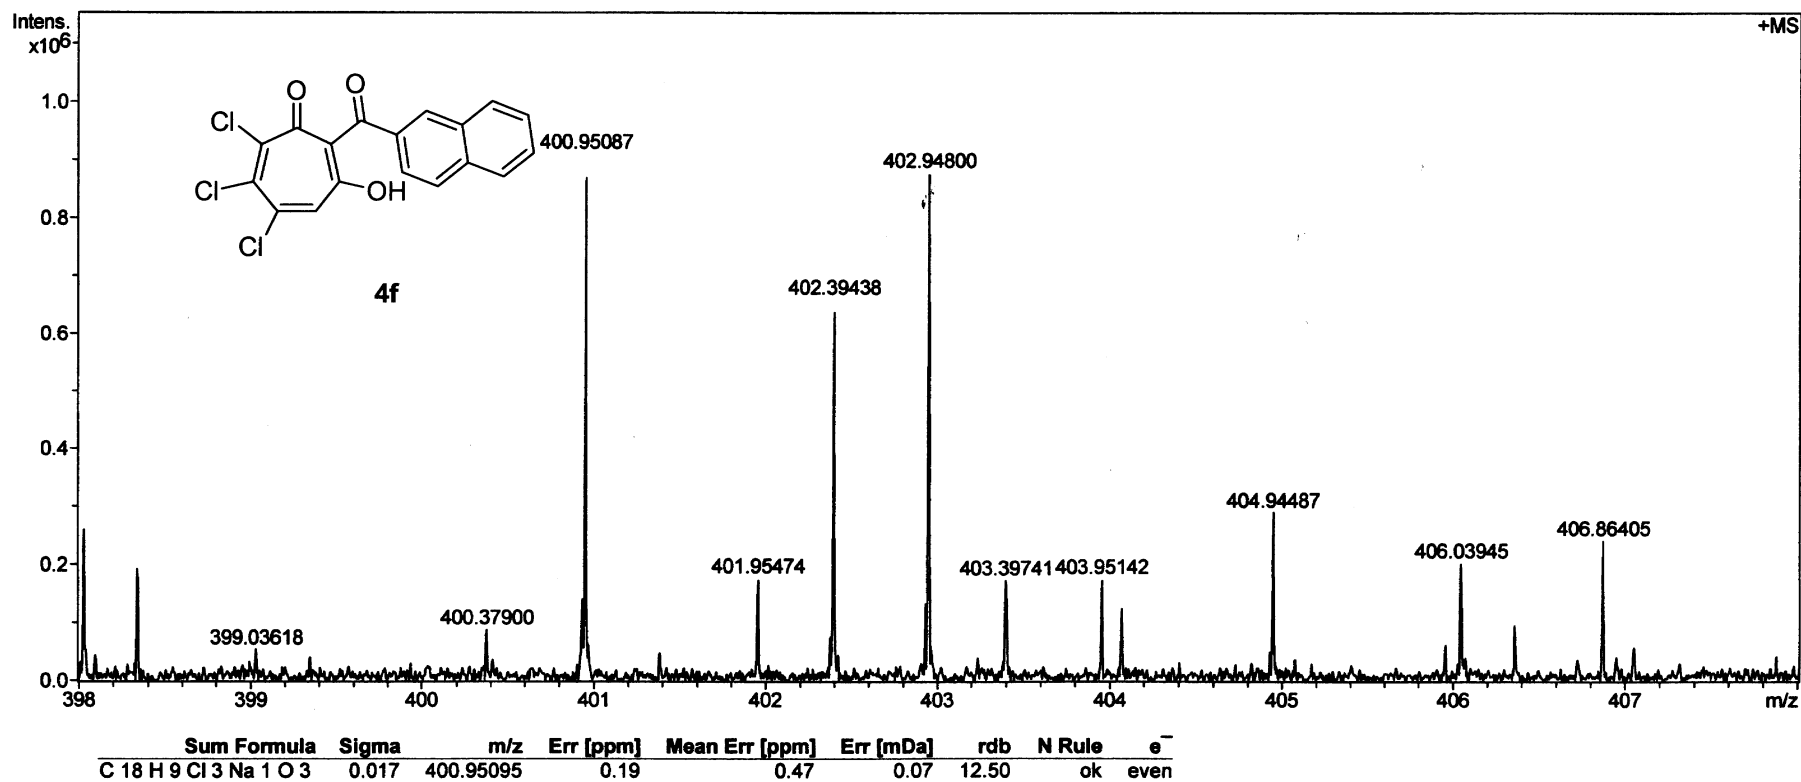

85

File Name : j:\maspec2\data\81483.ms2  
Creation Date/Time : 08-12-17 at 12:24:57  
File Type : Lo-Res Data - Raw (Magnet)  
File Source : Acquired on MASPEC II system [msw/9888]  
Operator : Peking University  
Instrument : ZAB-HS

SCAN GRAPH. Flagging=Nom.M/z. Ctd=[Thr:1000, Min.Hgt:1000, Min.Wid(Mlt):10(7), Inc:10%, Res:10%].

Scan 25#2:11. Sub.=4#0:20. "21". Entries=418. Base M/z=127.2. 100% Int.=1.01888. EI. POS.

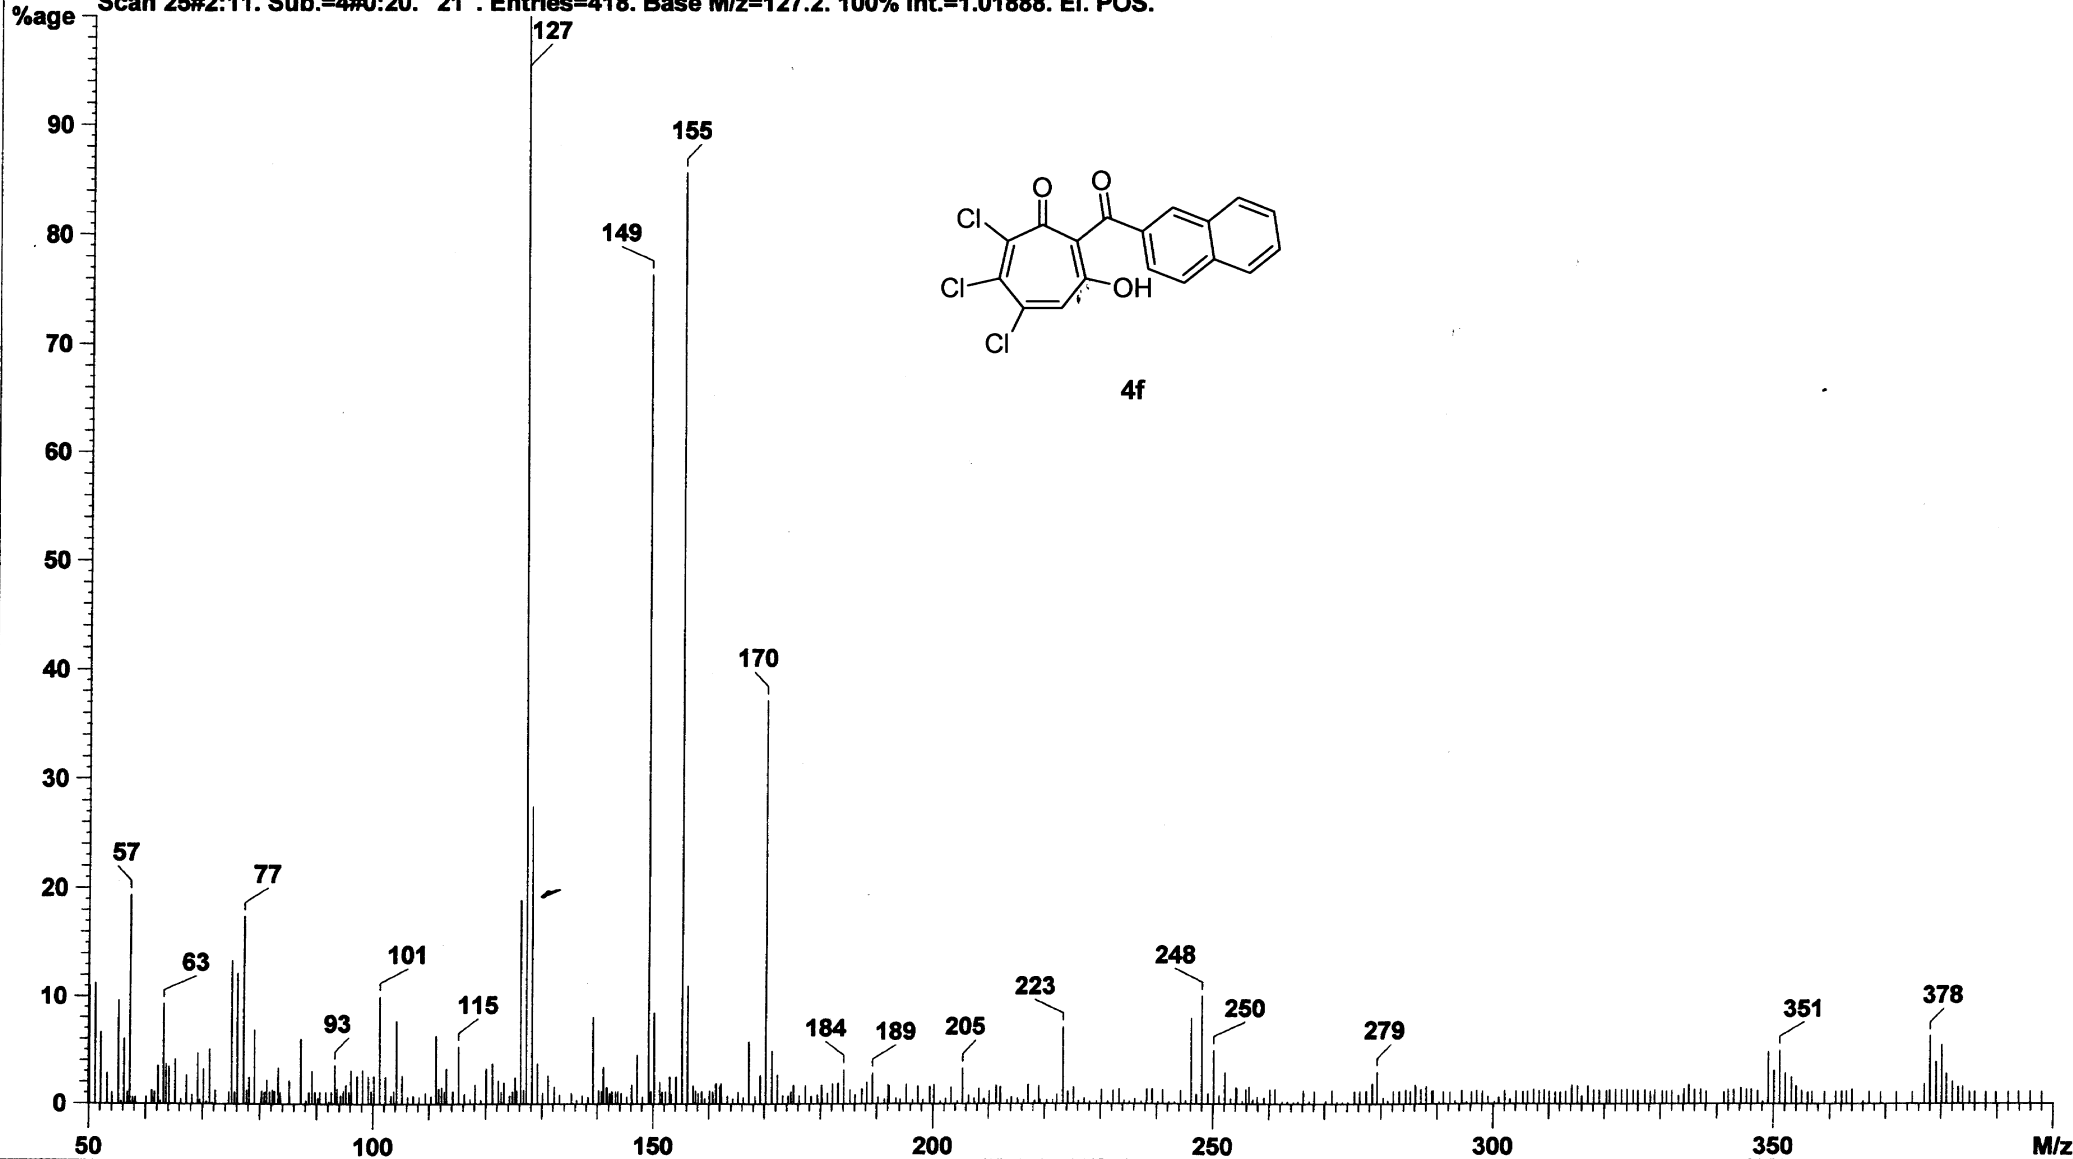

Supplement: b903515j.pdf [file b903515j.pdf]
